# Supplementary material for: Disparities in spread and control of influenza in slums of Delhi: findings from an agent-based modelling study
Source: PubMed Central journal article supplement — BMJ Open. 2018 Jan 21;8(1):e017353. doi: 10.1136/bmjopen-2017-017353 (PMC5780711; doi:10.1136/bmjopen-2017-017353), 2018-01-21
Supplement: bmjopen-2017-017353.draft_revisions.pdf [file bmjopen-2017-017353.draft_revisions.pdf]

# BMJ Open

BMJ Open is committed to open peer review. As part of this commitment we make the peer review history of every article we publish publicly available.

When an article is published we post the peer reviewers' comments and the authors' responses online. We also post the versions of the paper that were used during peer review. These are the versions that the peer review comments apply to.

The versions of the paper that follow are the versions that were submitted during the peer review process. They are not the versions of record or the final published versions. They should not be cited or distributed as the published version of this manuscript.

BMJ Open is an open access journal and the full, final, typeset and author-corrected version of record of the manuscript is available on our site with no access controls, subscription charges or pay-per-view fees (<http://bmjopen.bmj.com>).

If you have any questions on BMJ Open's open peer review process please email [editorial.bmjopen@bmj.com](mailto:editorial.bmjopen@bmj.com)

# BMJ Open

## Disparities in Spread and Control of Influenza in Slums of Delhi

|                                 |                                                                                                                                                                                                                                                                                                                                                                                                                                                                                                                                                                                                                                                                                                                                                                                                                                                                                                                                                                                                                                                                                                                                                                                                                                                                                                                                                                                                |
|---------------------------------|------------------------------------------------------------------------------------------------------------------------------------------------------------------------------------------------------------------------------------------------------------------------------------------------------------------------------------------------------------------------------------------------------------------------------------------------------------------------------------------------------------------------------------------------------------------------------------------------------------------------------------------------------------------------------------------------------------------------------------------------------------------------------------------------------------------------------------------------------------------------------------------------------------------------------------------------------------------------------------------------------------------------------------------------------------------------------------------------------------------------------------------------------------------------------------------------------------------------------------------------------------------------------------------------------------------------------------------------------------------------------------------------|
| Journal:                        | <i>BMJ Open</i>                                                                                                                                                                                                                                                                                                                                                                                                                                                                                                                                                                                                                                                                                                                                                                                                                                                                                                                                                                                                                                                                                                                                                                                                                                                                                                                                                                                |
| Manuscript ID                   | bmjopen-2017-017353                                                                                                                                                                                                                                                                                                                                                                                                                                                                                                                                                                                                                                                                                                                                                                                                                                                                                                                                                                                                                                                                                                                                                                                                                                                                                                                                                                            |
| Article Type:                   | Research                                                                                                                                                                                                                                                                                                                                                                                                                                                                                                                                                                                                                                                                                                                                                                                                                                                                                                                                                                                                                                                                                                                                                                                                                                                                                                                                                                                       |
| Date Submitted by the Author:   | 18-Apr-2017                                                                                                                                                                                                                                                                                                                                                                                                                                                                                                                                                                                                                                                                                                                                                                                                                                                                                                                                                                                                                                                                                                                                                                                                                                                                                                                                                                                    |
| Complete List of Authors:       | Adiga , Abhijin ; Network Dynamics and Simulation Sciences Laboratory, Biocomplexity Institute, Virginia Tech<br>Chu, Shuyu; Network Dynamics and Simulation Sciences Laboratory, Biocomplexity Institute, Virginia Tech<br>Eubank, Stephen; Network Dynamics and Simulation Sciences Laboratory, Biocomplexity Institute, Virginia Tech<br>Gupta, Sandeep; Network Dynamics and Simulation Sciences Laboratory, Biocomplexity Institute, Virginia Tech<br>Kuhlman, Christopher ; Network Dynamics and Simulation Sciences Laboratory, Biocomplexity Institute, Virginia Tech<br>Lewis, Bryan ; Network Dynamics and Simulation Sciences Laboratory, Biocomplexity Institute, Virginia Tech<br>Marathe, Achla; Network Dynamics and Simulation Sciences Laboratory, Biocomplexity Institute, Virginia Tech, ;<br>Marathe, Madhav ; Network Dynamics and Simulation Sciences Laboratory, Biocomplexity Institute, Virginia Tech<br>Nordberg, Eric ; Network Dynamics and Simulation Sciences Laboratory, Biocomplexity Institute, Virginia Tech<br>Swarup, Samarth; Network Dynamics and Simulation Sciences Laboratory, Biocomplexity Institute, Virginia Tech<br>Vullikanti, Anil; Network Dynamics and Simulation Sciences Laboratory, Biocomplexity Institute, Virginia Tech<br>Wilson, Mandy ; Network Dynamics and Simulation Sciences Laboratory, Biocomplexity Institute, Virginia Tech |
| <b>Primary Subject Heading</b>: | Global health                                                                                                                                                                                                                                                                                                                                                                                                                                                                                                                                                                                                                                                                                                                                                                                                                                                                                                                                                                                                                                                                                                                                                                                                                                                                                                                                                                                  |
| Secondary Subject Heading:      | Epidemiology, Public health, Health informatics, Infectious diseases                                                                                                                                                                                                                                                                                                                                                                                                                                                                                                                                                                                                                                                                                                                                                                                                                                                                                                                                                                                                                                                                                                                                                                                                                                                                                                                           |
| Keywords:                       | Delhi, epidemic, interventions, slum population, synthetic social contact network                                                                                                                                                                                                                                                                                                                                                                                                                                                                                                                                                                                                                                                                                                                                                                                                                                                                                                                                                                                                                                                                                                                                                                                                                                                                                                              |
|                                 |                                                                                                                                                                                                                                                                                                                                                                                                                                                                                                                                                                                                                                                                                                                                                                                                                                                                                                                                                                                                                                                                                                                                                                                                                                                                                                                                                                                                |

SCHOLARONE™  
Manuscripts

1 Main manuscript  
2  
3  
4  
5

6 **Disparities in Spread and Control of Influenza in Slums of Delhi**  
7

8 A. Adiga, S. Chu, S. Eubank, S. Gupta, C. J. Kuhlman, B. Lewis, A. Marathe, M.  
9 Marathe, E. K. Nordberg, S. Swarup, A. Vullikanti and M. L. Wilson  
10

11  
12  
13 Corresponding Author:  
14 Achla Marathe  
15

16 Network Dynamics and Simulation Sciences Laboratory  
17 Biocomplexity Institute  
18 Virginia Tech  
19 1015 Life Science Circle  
20 Blacksburg, VA 24061-0477, USA  
21 [amarathe@vt.edu](mailto:amarathe@vt.edu)  
22  
23

24 (F): 540-231-2891  
25 (P): 540-231-9210  
26  
27

28 Co-authors:  
29 Abhijin Adiga, Shuyu Chu, Stephen Eubank, Sandeep Gupta, Chris J  
30 Kuhlman, Bryan Lewis, Achla Marathe, Madhav Marathe, Eric K Nordberg, Samarth  
31 Swarup, Anil Vullikanti, Mandy L Wilson  
32  
33

34 Network Dynamics and Simulation Sciences Laboratory  
35 Biocomplexity Institute  
36 Virginia Tech  
37 1015 Life Science Circle  
38 Blacksburg, VA 24061-0477, USA  
39  
40

41 Keywords: Delhi; epidemic; interventions; slum population; synthetic social contact  
42 network.  
43  
44

45  
46 Word count: 5975  
47  
48  
49  
50  
51  
52  
53  
54  
55  
56  
57  
58  
59  
60

1 Main manuscript  
2

3 **ABSTRACT**  
4

5 **Objectives** This research studies the role of slums in the spread and control of  
6 infectious diseases in the National Capital Territory of India, Delhi, using a detailed  
7 social contact network of its residents.  
8

9 **Methods** We use an agent-based model to study the spread of Influenza in Delhi  
10 through person-to-person contact. Two different networks are used; one in which slum  
11 and non-slum regions are treated the same and the other in which 298 slum zones are  
12 identified. In the second network slum-specific demographics and activities are  
13 assigned to the individuals whose homes reside inside these zones. The main effect of  
14 integrating slums is that the network has more home-related contacts due to larger  
15 family size and more outside contacts due to more daily activities outside home. Various  
16 vaccination and social distancing interventions are applied to control the spread of  
17 Influenza.  
18

19 **Results** Simulation based results show that when slum attributes are ignored, the  
20 effectiveness of vaccination can be overestimated by 30%-55%, in terms of reducing  
21 the peak number of infections and the size of the epidemic, and in delaying the time to  
22 peak infection. The slum population sustains greater infection rates under all  
23 intervention scenarios in the network that treats slums differently. Vaccination strategy  
24 performs better than social distancing strategies in slums.  
25

26 **Conclusions** Unique characteristics of slums play a significant role in the spread of  
27 infectious diseases. Modeling slums and estimating their impact on epidemics will help  
28 policy makers and regulators more accurately prioritize allocation of scarce medical  
29 resources and implement public health policies.  
30

31 **Policy Implications** Currently, over a billion people reside in slums across the world  
32 and this population is expected to double by 2030. This study uses Influenza as an  
33 example to demonstrate the need to understand the role of slum populations in the  
34 spread and containment of infectious diseases.  
35  
36

37 **Strengths and limitations of this study**  
38

- 39
- 40 ➤ We show that the unique attributes of slums must be accounted for in  
41 understanding the spread and control of infectious diseases.
  - 42 ➤ Policymakers should give special consideration to slums when allocating limited  
43 resources.
  - 44 ➤ Intervention strategies have been applied one at a time but a combination of  
45 them could be used simultaneously to more aggressively control the epidemic.
  - 46 ➤ This study does not consider age-specific susceptibility or immunity from past  
47 infections; all agents are assumed to be equally susceptible.
  - 48 ➤ Co-location based contact time is used as a proxy for physical proximity and  
49 short-distance airborne transmission.
  - 50
  - 51
  - 52
  - 53
  - 54
  - 55
  - 56

57 **INTRODUCTION**  
58  
59  
60

1 Main manuscript  
2  
3  
4

5 Infectious disease is one of the leading causes of human morbidity and mortality  
6 worldwide. Reports from Centers for Disease Control (CDC) show that over 200,000  
7 people in the United States (US) are hospitalized with Influenza-like illnesses (ILI)  
8 symptoms each year, and the mortality on average is over 36,000 annually.[1-2] In  
9 Delhi, India, a joint study by CDC, All India Institute of Medical Sciences, and the  
10 National Institute of Virology has shown that ILI cases are present throughout the year,  
11 although they peak in rainy and winter seasons.[3] It carries a significant economic  
12 burden through reduced productivity and high costs of health care.[4-7] A CDC study  
13 finds that for outpatient and non-medically attended individuals, acute respiratory  
14 infections cost 1%-5% of monthly per capita income in India. In contrast, cost of  
15 inpatient care can be as high as 6%-34% of annual per capita income.[8] For developed  
16 countries, the annual cost of Influenza is estimated to be between \$1-\$6 million per  
17 100,000 people, according to the World Health Organization.[9]

20  
21 In 2007, India established an Integrated Disease Surveillance Program (IDSP), which  
22 included a network of 12 regional laboratories, to minimize the threat of avian influenza  
23 and other highly infectious zoonotic diseases.[10] India faces some unique challenges  
24 in surveillance, prevention and control because of the seasonality of Influenza at sub-  
25 regional levels. This seasonal variation depends upon latitude, monsoon season,  
26 humidity and climatic factors of the regions. Acute respiratory infections are estimated to  
27 be 43 million per year, of which 4-12% are due to influenza.[11-12] Chadha et al.[13]  
28 estimated hospitalizations due to respiratory illnesses to be 160 per 10,000 persons in  
29 year 2011, and children under age 5 had the highest incidence of them.

32  
33 Given that Influenza is airborne and spreads through close proximity, population density  
34 is an important factor in its spread. In India, the average population density is about  
35 1000 people per square mile; in the slums, it can be 10 to 100 times higher.[14] Larger  
36 household size and crowding make it easier to transmit airborne infections).[15-18] For  
37 example, Baker et al.[16] find that meningococcal disease risk among children doubles  
38 with the addition of 2 adolescents or adults (10 years or older) to a 6-room house. Other  
39 than overcrowding, slums are characterized by their lack of medical services,[19-20]  
40 which makes slum residents highly vulnerable to infectious diseases. Diseases like  
41 cholera, malaria, dengue and HIV are common in slums across the world.[21-23]

44  
45 This research uses Delhi, the National Capital Territory of India, where 13% of its 13.8  
46 million people live in slum areas, as an example city to study the spread and control of  
47 Influenza. Delhi is an interesting case study. It ranks fourth in the world in urban  
48 population, and, among the top 25 largest urban areas, it ranks tenth in population  
49 density. Moreover, the results are likely to be generalizable to other slum areas within  
50 and outside of India.

52  
53 This paper is an extension of the work done in Chen et al.[4], which shows that slum  
54 populations have a significant effect on Influenza transmission in urban areas. Ignoring  
55 the influence of slum characteristics underestimates the speed of an outbreak and its  
56 extent. However, Chen et al.[4] do not consider any interventions on the epidemic  
57  
58  
59  
60

1 Main manuscript

2  
3 spread. *The focus of this research is to study the effect of different intervention*  
4 *strategies on several subpopulations (slum, age and gender) in two different Delhi*  
5 *networks, i.e., original (referred to as Network 1) and refined (Network 2).*  
6  
7

8 The original network used in Xia et al.[24] studied the spread and control of Influenza in  
9 Delhi using Network 1, which did not take into account the special attributes of the slum  
10 population, such as larger family sizes and different types of daily activity schedules.  
11 Chen et al.[4] used Network 2, the refined social network of Delhi, which accounted for  
12 slum demographics and slum activities, but did not study intervention strategies. In  
13 Network 2, there are 298 slum regions in Delhi, containing about 1.8 million people.  
14  
15

16 The goals of this work focus on understanding the effects of pharmaceutical and non-  
17 pharmaceutical interventions on epidemic outcomes. Pharmaceutical interventions (PI)  
18 include vaccinations, and non-pharmaceutical interventions (NPI) are social distancing  
19 measures such as school closure, quarantine and staying home. These effects are  
20 studied comparatively: (i) in Network 1 versus Network 2, overall and for subpopulations  
21 in each; and (ii) in the slum and non-slum regions of Network 2. Additionally, in a  
22 scenario where interventions can be applied to a limited number of individuals, we  
23 explore how resources should be split between slum and non-slum subpopulations in  
24 order to achieve the best outcomes with respect to total infection rate (i.e., the  
25 cumulative fraction of a population infected), peak infection rate (i.e., the maximum  
26 fraction of a population infected on any day), and time-to-peak infection.  
27  
28  
29

## 30 METHODS

31  
32 We use an agent-based modeling (ABM) approach to simulate the spread and  
33 containment of Influenza in social contact networks of Delhi, India. We compare two  
34 networks, one considers slum-specific attributes, and the other does not. In this section,  
35 we describe the networks, the disease model for each agent, the interventions, and the  
36 heterogeneities of the problem that make ABM uniquely suited to study epidemics.  
37  
38  
39

40 **Social Contact Networks:** This study uses two synthetic social networks of Delhi,  
41 created in Xia et al.[24] and in Chen et al.[4]. Details on their construction can be found  
42 in Xia et al.[24], Chen et al.[4], Barrett et al.[25], Bisset et al.[26] and references therein.  
43 The synthetic social network by Xia et al.[24] is called *Network 1*, and the more refined  
44 network developed in Chen et al.[4], *Network 2*.  
45  
46

47 Network 1 was developed in part from Land Scan and Census data for Delhi, a daily set  
48 of activities of individuals, and the locations of those activities including geo-locations of  
49 residential areas, shopping centers, and schools, collected through surveys by  
50 MapMyIndia.com. By assigning activity locations to individuals' activities, people are  
51 located at particular times at particular geographic coordinates (including office  
52 buildings, schools, etc.) and within particular rooms of buildings. Next, contacts between  
53 individuals are estimated when each person is deemed to have made contact with a  
54 subset of other people simultaneously present at the same location. This gives rise to a  
55 synthetic social contact network where network edges represent these contacts.  
56  
57  
58  
59  
60

1 Main manuscript  
2  
3  
4

5 Network 2 models the slum regions in Delhi and assigns slum-specific attributes to the  
6 individuals whose homes reside in the slum polygons. Slum residents' attributes and  
7 their daily sets of activities are collected through a ground survey in Delhi slums, by a  
8 vendor, Indiamart ([www.Indiamart.com/trips](http://www.Indiamart.com/trips)). The slum polygons are obtained from  
9 *MapMechanic.com*. Individuals living in the slum regions are a part of the slum  
10 population. All other individuals are part of the non-slum population. Network 2 is a geo-  
11 located, and contextualized social contact network of Delhi with slums integrated in it.  
12

13  
14 Following are the main differences between the original network (Network 1) and the  
15 refined network (Network 2). The original social contact network treats the slum regions  
16 like any other region in Delhi in terms of assignment of demographics and individual  
17 activities, i.e. no special consideration is given to slum residents. The refined Network 2  
18 identifies 298 slum polygons (zones) in Delhi and assigns slum-specific demographics  
19 and activities to the individuals whose homes reside inside these polygons. Thus, the  
20 number of individuals is the same in both populations. The slum population constitutes  
21 about 13% (1.8 million) of the entire Delhi population of 13.8 million people. The main  
22 effect of integrating slums is that Network 2 has more home-related contacts due to  
23 larger family size and more outside contacts due to more daily activities outside home.  
24 Also, those individuals who reside outside of slum zones have the same activities in  
25 both networks. Overall, there are over 231 million daily interactions between pairs of  
26 individuals. Table S1 compares those two networks as well as data sources for slum  
27 and non-slum Delhi, India. (Table and figure numbers that are prefixed with 'S' are in  
28 the supplementary information (SI)). We refer to Chen et al.[4] for more detailed  
29 information about the two networks. Several plots of properties and structural  
30 characteristics of Networks 1 and 2 are given in Chen et al.[27].  
31  
32  
33  
34

35 **Disease Model:** An SEIR, Susceptible (S), Exposed (E), Infectious (I) and Removed or  
36 Recovered (R) model is considered within each individual. Each node in the network  
37 represents an individual, and each edge represents a contact on which the disease can  
38 spread. A contact represents possible transmission between two people that are co-  
39 located for some duration (based on their activity schedules). This is an approximation  
40 to model direct contact and short-distance airborne transmission.  
41  
42  
43

44 We start each epidemic simulation with 20 index cases, randomly chosen. (We find that  
45 results are not sensitive to the number of initial infections.) The detailed description of  
46 the SEIR model as well as the choices of transmissibility value,  $R_0$ , the explicit  
47 incubation and exposed periods can be found in the supplementary information. This  
48 disease model has been used in other works such as Liao et al.[28], Marathe et al.[29].  
49  
50

51 The transmissibility value for disease transmission is that for the strong influenza model  
52 in Chen et al.[4]. That work used mild, strong, and catastrophic influenza models, so we  
53 chose the intermediate transmissibility. This corresponds to base attack rates (i.e.,  
54 cumulative infection fractions) of 0.42 and 0.48, respectively, in Networks 1 and 2.  
55 These rates are generally higher than those in some other studies that either compute  
56 experimental attack rates from cases or compute them in modeling studies such as this  
57  
58  
59  
60

1 Main manuscript  
2  
3

4 one. Attack rates used by past researchers for different strains of influenza include Asia  
5 [0.22 to 0.50],[30] Southeast Asia [0.11 to 0.31 in children [31]; 0.05 to 0.65 [32]], and  
6 India [0.111 to 0.235 [33]; 0.074 to 0.424 [34]; 0.045 to 0.294 [35]; 0.008 to 0.100 [36];  
7 0.209 for various strains [13]]. The results of Chen et al.[4] indicate that the results here,  
8 for this particular transmissibility, will be qualitatively the same for other transmissibility,  
9 but will scale down or up as transmissibility changes in the same direction.  
10

11 **Interventions:** This work considers three vaccination scenarios, i.e., vaccinate when  
12 cumulative infection rate is 0% (VAX0, i.e. vaccinate on day 1), 1% (VAX1), and 5%  
13 (VAX5). Three classes of social distancing strategies are considered: (i) stay-home  
14 (SHO) if infected i.e. eliminate all non-home related contacts but continue to maintain  
15 contacts within the household; (ii) close-schools when cumulative infection rate has  
16 reached 1% (CS1) and when it has reached 5% (CS5) i.e. eliminate school related  
17 contacts; and (iii) (ISO), in which all contacts, including home contacts, of a person are  
18 eliminated when a person becomes infectious. For vaccination, five different compliance  
19 rates (10%, 30%, 50%, 70%, 90%) and two different vaccine efficacies (30% and 70%)  
20 are considered. Interventions are applied to slum residents, non-slum residents, and the  
21 entire region of Delhi. For each experiment, 25 replicates are simulated for 400 days,  
22 and their mean results are reported. Table S2 summarizes all the interventions  
23 considered, and Table S3 contains all variables in simulations, including intervention  
24 parameters.  
25  
26  
27  
28

29 **Heterogeneities captured:** There are several heterogeneous aspects to this problem  
30 that motivate the use of an ABM approach: (i) the 298 slum zones have populations that  
31 vary by more than four orders of magnitude in size; (ii) the geographic extent of slum  
32 zones differ; (iii) the slum zones are located at irregular spatial intervals throughout  
33 Delhi; (iv) the activity patterns of people living in slums are different from those in the  
34 non-slum region; and (v) each individual interacts with specific others based on co-  
35 location.  
36  
37  
38

39 The implications of these heterogeneities include the following. First, the particular  
40 synthetic households that live within slums are predicated on the number of slum zones,  
41 their locations, and their spatial geometries. These homes have larger family size and  
42 hence more home contacts. Second, slum individuals have different activity patterns  
43 which change the co-located contacts of each slum person: that is, with whom they  
44 interact and for how long. For example, see the supplemental Figure S6 of Chen et  
45 al.[27]. The average total contact durations by activity type and by slum/non-slum  
46 residents are provided, which show that non-slum people have greater contact  
47 durations for work, school, and college activities, but less for home and other types.  
48 Overall, a slum person has about 50% greater total contact duration per day compared  
49 to a non-slum person. Figure S7 of the same supplemental shows that in the age range  
50 20 to 60 years (by year), females that live in slums have more contacts per day than  
51 their male counterparts. However, females whose homes are outside of slum regions  
52 have average number of daily contacts that are below their male counterparts.  
53  
54  
55  
56  
57  
58  
59  
60



1 Main manuscript  
2  
3

## 4 **RESULTS AND ANALYSIS**

5 Our results are grouped as follows. (1) Comparisons of Network 1 and Network 2 for  
6 base case and intervention cases. (2) Results for both networks based on demographic  
7 classes, such as slum/non-slum, gender, and age groups, for a wider range of  
8 intervention strategies. (3) Effects of pharmaceutical and non-pharmaceutical  
9 interventions for a wide range of parameter values. (4) Effects of different resource  
10 allocation strategies.  
11

12 All differences are tested with the two-sample t-test and they are all statistically  
13 significant with p-values smaller than  $2.2e-16$ . The 95% confidence intervals are given  
14 for each comparison. Here is a brief summary of selected results with examples of  
15 mechanisms, to provide a high-level overview. Details of results follow this summary  
16 and these details matter because there are many factors (inputs) in a simulation whose  
17 interactions change results.  
18  
19

20  
21 (1) Ignoring the unique attributes of slums in a population overestimates the benefits of  
22 the interventions. For example, in the case of vaccination intervention (efficacy 30% and  
23 compliance 30%), the values for the epidemic size (i.e., cumulative percentage of  
24 infected), peak infection rate, and time to peak are 33.1%, 3.0%, and 184 days,  
25 respectively, in Network 2, whereas they are 23.3%, 1.34%, and 286 days in Network 1.  
26 In relative terms, the epidemic size and peak infection rate are underestimated by  
27 42.2% and 123.2% respectively, while the time to peak is overestimated by 35.7% in  
28 Network 1 (see Figure 1 and Table S5). The larger family sizes for slum families in  
29 Network 2 and the increased number of edges result in larger outbreaks and faster time  
30 to peak infections.  
31  
32

33  
34 (2) Interventions are more effective in Network 1 than Network 2 for all types of  
35 interventions: vaccination, closing schools, staying home, and isolation. These trends  
36 also hold over wide ranges of efficacy and compliance (see Figures 3, 4, S1, S2 and  
37 S7). Hence, not accounting for slums gives overly optimistic results for the effectiveness  
38 of the interventions. The reduced average family size in Network 1 means fewer within-  
39 home edges, which slows infection and reduces spreading. Closing schools and staying  
40 home interventions do not affect home edges. However, the magnitude of this effect  
41 varies with intervention conditions (e.g., compliance rate, time at which intervention is  
42 applied).  
43  
44

45  
46 (3) Cumulative infection rates by subpopulation in Network 2 show that slums sustain  
47 greater infection rates than non-slums under all intervention scenarios, sometimes by as  
48 much as 44.0%. See Figure 4 and Table S9 for more details. This is due to the greater  
49 household sizes in slums.  
50

51  
52 (4) For Network 2, under a wide range of intervention compliance rates (10% to 90%),  
53 the isolation strategy is up to 32% more effective in containing an outbreak than  
54 vaccination (for 30% efficacy). Staying home is up to 18% more effective than  
55 vaccination at 50% compliance. See Figure 3 and Table S10 for more details. Isolation,  
56 although hard to implement from practical considerations, is most effective because  
57  
58  
59  
60

1 Main manuscript  
2

3 edges to susceptible individuals are removed (isolation also provides a good  
4 comparative case). Differences between staying home and vaccination depend on  
5 compliance rates.  
6

7  
8 (5) For Network 2, delay in triggering interventions has 7.3% to 44.0% more adverse  
9 effect in slums than in non-slum regions across compliance rates from 10% to 90%. See  
10 Figure 4 and Table S7 for more details. Early interventions mean actions are taken  
11 when outbreaks are smaller and are therefore more readily contained.  
12

13  
14 (6) A full-factorial design that splits resources between slum and non-slum regions  
15 indicates that the most effective intervention is to give vaccines to slums and apply  
16 social distancing to non-slums. Applying vaccine and social distancing to slum regions  
17 is the next most effective intervention. See Figure 5. By applying social distancing to  
18 non-slums, these individuals are kept isolated from slum individuals that are infected.  
19  
20

## 21 22 **Comparison between Networks 1 and 2: Base case versus interventions** 23

24 We start with a comparative analysis of the Influenza epidemic, with and without  
25 interventions, on Network 1 and Network 2 to measure the impact of integrating slums  
26 in the population on epidemic measures. Figure 1 shows the simulation time histories  
27 (averaged across 25 simulations) for the base case, and when vaccination is applied  
28 randomly to 30% of the population in each network with vaccine efficacy set at 30%.  
29 Mean infection rate is the daily fraction of infected individuals. Simulations for other  
30 vaccine efficacies and compliance rates give qualitatively similar results. Two sets of  
31 those results are shown in the supplemental information, see Figures S1 and S2. Note  
32 that Network 1 does not distinguish between slum and non-slum individuals, so the  
33 epidemic curve is not split by subpopulation.  
34  
35

36  
37 Results in Network 2 differ significantly from results in Network 1 for both the base case  
38 and intervention case. In Network 2, the epidemic starts earlier, peaks earlier, has a  
39 larger epidemic size and has higher peaks compared to the corresponding epidemic  
40 quantities in Network 1. Thus, if policy planners ignore slums and use Network 1 to  
41 plan, there will be a false sense of security and lack of urgency to implement  
42 interventions. For both the base case and the intervention case, ignoring unique  
43 characteristics of the slums will result in an underestimation of the infections and the  
44 speed of spread.  
45  
46

47  
48 Figure 1 goes here  
49

50  
51 For the intervention cases, the time to peak infection decreases by 35.7%, i.e. from 286  
52 days for Network 1 to 184 days for Network 2, meaning an influenza epidemic would  
53 peak roughly 100 days earlier than one would expect based on the results from Network  
54 1. For the base case, time to peak infection drops by 20.8%, i.e. 34 days reduction for  
55 Network 2 as compared to Network 1.  
56  
57  
58  
59  
60

1 Main manuscript  
2  
3

4 Percentage changes and differences must be viewed cautiously, and to illustrate this  
5 point, we present data for the key parameters in Tables S4 and S5. The difference in  
6 the peak infection rate (i.e., the maximum fraction of daily infected individuals during the  
7 simulation) between Networks 1 and 2 for the base case is 2.2%, or 47.6% in  
8 percentage change (see Table S4). For the intervention case shown in Table S5, the  
9 difference between the two networks is less (1.7%), but the percentage change is more  
10 (123.2%) because the magnitudes of the peak infection rates are reduced when  
11 effective interventions are used. We make note of this here and mainly use the  
12 percentage change values in discussing results. For more detailed comparison between  
13 vaccination intervention and the base case in Network1 and Network 2, we refer to  
14 Tables S6 and S7, Figures S3 and S4.  
15  
16  
17

### 18 **Comparison between Networks 1 and 2 based on individual demographic** 19 **information** 20

21  
22 We divide the Delhi population into strata by age, gender, and geographic home  
23 location (i.e., slum and non-slum), and analyze mean cumulative infection rates by  
24 subpopulation for the two networks. In simulations, individuals are chosen at random in  
25 the entire network for vaccination. Various vaccination scenarios are investigated.  
26  
27

28 Figure 2 displays the cumulative infection rate results. On the x-axis, 'Total' refers to the  
29 entire population of Delhi. There are three breakdowns of the entire population. 'Slum'  
30 and 'Non-slum' refer to slum and non-slum regions, respectively. 'Male' and 'Female'  
31 denote the total number of males and females in Delhi, respectively. Four age groups  
32 are considered: 'Preschool' (0-4), 'School' (5-18), 'Adult' (19-64), and 'Senior' (65+). The  
33 black lines correspond to the mean cumulative infection rates for the base case. Other  
34 curves indicate vaccination strategies under different levels of vaccination rate ( $v$ ) and  
35 vaccine efficacy ( $\alpha$ ). Two vaccination rates (30%, 50%) and two vaccine efficacy rates  
36 (30%, 70%) are shown in the figure.  
37  
38

39 For Network 1, vaccination rate of 50% or higher stops the epidemic for all categories of  
40 individuals, regardless of vaccine efficacy. An efficacy of 70% also contains the  
41 epidemic, given a vaccination rate of at least 30%. In comparison, for Network 2, either  
42 a vaccination rate of 70% is required (not shown in plot for clarity) or a vaccination rate  
43 of 50% combined with a vaccine efficacy of 70% is required to stop the epidemic for all  
44 categories of individuals.  
45  
46  
47

48 In Network 1, slum and non-slums are treated the same so the infection rates are  
49 identical in Figure 2. However, all scenarios in Network 2 show a higher burden of  
50 disease on the slum population. This is due to the fact that slum households have larger  
51 family size and more contacts on average than households in non-slum areas, see  
52 Chen et al.[27]. As shown later, we find similar patterns of infection in slum and non-  
53 slum subpopulations for other interventions such as 'close-schools' and 'stay-home'.  
54  
55  
56  
57  
58  
59  
60

1 Main manuscript  
2

3 The results in both Figure 1 and Figure 2 indicate that ignoring the effect of slums  
4 results in overestimation of the benefits of interventions in terms of reduction in the  
5 mean infection rate and peak infection rate, as well as the time to peak. This optimism  
6 holds for slum, non-slum and total population under various levels of vaccination rates  
7 and efficacy rates in Network 2. See Table S8 for more detailed comparison of results  
8 between slum and non-slum in Network 2.  
9  
10

11 Figure 2 goes here  
12  
13

### 14 **Comparison between Networks 1 and 2 across a wide range of intervention** 15 **strategies** 16

17  
18 Next, we consider a variety of intervention strategies for comparative analysis. We  
19 consider vaccination, school closure, stay home, and isolation strategies. For vaccines,  
20 three different trigger points are considered: when cumulative infection rate reaches 0%  
21 (VAX0), 1% (VAX1) and 5% (VAX5). For close-schools, two trigger points are used:  
22 when the cumulative infection rate reaches 1% (CS1), and 5% (CS5). Under the stay at  
23 home (SHO) strategy, all non-home activities and interactions are eliminated but all  
24 contacts within the household are maintained. Under isolation (ISO) an individual has  
25 no contact with other individuals (even home interactions are eliminated). The stay-at-  
26 home and isolation interventions are implemented for compliant infectious individuals,  
27 after they become infectious, for the entire infectious duration.  
28  
29  
30

31 Figure 3 displays average cumulative infection rates in Network 1 and Network 2 for a  
32 wide range of intervention strategies. For each strategy, five different compliance rates  
33 are considered, i.e., 10%, 30%, 50%, 70% and 90%. The cumulative infection rates  
34 (i.e., fractions) are displayed as larger numbers in boxes, while smaller-font numbers  
35 are the actual number of infected individuals. Darker colors correspond to higher  
36 infection rates. Note that compliance rate is simply the vaccination rate for strategies  
37 VAX0, VAX1 and VAX5. Compliant individuals are selected at random from the entire  
38 population. The 'Base' values do not vary with compliance because the base case has  
39 no intervention. Note that all heat maps in this paper use the same color scheme so that  
40 colors can be compared across figures.  
41  
42  
43

44 Since Network 1 does not distinguish between slum and non-slum populations, we only  
45 compare the two networks for the whole of Delhi. The general pattern is similar for both  
46 networks. However, all interventions have a larger effect on Network 1 under the same  
47 compliance rate (that is, corresponding numbers are uniformly lower for Network 1 than  
48 for Network 2). The infection rates drop to zero at a smaller compliance rate for VAX0,  
49 stay-home, and isolation strategies in Network 1 as compared to those for Network 2.  
50  
51

52 Figure 3 goes here  
53  
54

### 55 **Effect of vaccination versus social distancing on slum and non-slum** 56 **subpopulations** 57 58 59 60

1 Main manuscript  
2  
3  
4

5 We now compare the impact of vaccination and social distancing on slum and non-slum  
6 subpopulations from Network 2. Social distancing interventions are close-schools, stay-  
7 home, and isolation.  
8

9 The mean cumulative infection rates (and actual numbers of infections underneath) for  
10 each compliance level are shown in the heat maps in Figure 4 for slum and non-slum  
11 populations in Network 2. The axis labels are identical to those in Figure 3, as is the  
12 color scheme of the cells. The base case values are constant since there is no  
13 intervention and hence no compliance. Darker colors correspond to higher infection  
14 rates.  
15  
16

17 Compared to the base case, all interventions reduce infection rates to some extent. As  
18 the compliance rate increases, infection rates drop for all interventions. Infection rates  
19 drop to zero in slum and non-slum regions at a compliance level of 70% or higher,  
20 under SHO, ISO, and VAX0 strategies. Early interventions or lower trigger levels reduce  
21 the infection rates significantly, and this effect increases with compliance rate.  
22  
23

24 The following observations can be made from Figure 4. Social distancing i.e. SHO at  
25 low and intermediate compliance and CS at all compliance levels, are less effective in  
26 slum regions as compared to non-slum regions. This is because CS only eliminates  
27 school interactions for those attending school, and there are fewer school edges in  
28 slums compared to non-slum areas, as shown in Figure S5. The effectiveness of CS in  
29 slums is mitigated by the greater average number and duration of interactions at home  
30 in slums as compared to non-slums (see Figure S5 and Chen et al.[27]). Thus, if a  
31 person is sick, there is a greater chance of transmitting contagion to family members,  
32 who then may have activities outside of school, thus circumventing the CS intervention.  
33 At high compliance, SHO is effective because all interactions outside home (including  
34 school) are eliminated.[27]  
35  
36  
37  
38

39 These observations are also supported by Figure S6, which contains numbers of edges  
40 used to transmit contagion for a base-case run of Figure 1. There are several effects  
41 that bear on the above observations. First, in the cases of activities "work", "other", and  
42 "school", the number of edges transmitting contagion from slums to non-slums is greater  
43 than the reverse: from non-slum to slum. Second, in two of these three activity  
44 categories, there is more slum to non-slum transmissions than slum to slum  
45 transmissions. Edges of transmission for slum dwellers is dominated by home  
46 interactions. The infected homes in slums serve as launching points to drive disease to  
47 non-slums through slum to non-slum interactions. (There are no "mixed" edges at  
48 homes, and shopping and college activities have low levels of slum activity because of  
49 socio-economic factors.) We will see the effects of these mechanisms in Figure 5, but  
50 we now return to Figure 4.  
51  
52  
53

54 Isolation works well at 30% or higher compliance rates, but it is a much harder strategy  
55 to implement, especially in slums. However, it is considered here for comparative  
56 analysis. Vaccination also produces marked decreases in cumulative outbreak sizes as  
57  
58  
59  
60

1 Main manuscript  
2  
3

4 compliance increases. However, close-school is generally less effective because this  
5 intervention removes only a fraction of interactions for a fraction of the population, i.e.  
6 school aged children. Simulations were also run for 70% vaccine efficacy. Since results  
7 are qualitatively similar for those parameters, these plots are provided in Figure S7.  
8

9 Figure 4 goes here  
10

### 11 **Constrained resource allocation among slum and non-slum areas**

12  
13 We consider a specific scenario under Network 2. If only a limited number of vaccines  
14 are available, and only a certain fraction of individuals can be kept home during an  
15 epidemic, how should these interventions be applied to the slum and non-slum regions  
16 so that the epidemic can be controlled effectively? Given that slum residents' attributes  
17 differ from those of non-slum residents, is there a strategy that works better in slums  
18 than in non-slum areas? The total population in Delhi is about 13.8 million, which  
19 includes about 1.8 million slum residents. We assume that only 10% of the total  
20 population can be covered by interventions, half through vaccination and the other half  
21 through stay home. Enough vaccines are available to cover 5% of the total population  
22 (i.e. 692,183 vaccinated, corresponding to about 38.25% of slum or 5.75% of non-slum  
23 population), and 5% of the individuals can stay home (692,183 individuals; this is  
24 applied to only the infected individuals). Note that an individual may receive a vaccine  
25 and also stay at home if this individual, in spite of being vaccinated, gets infected.  
26  
27  
28  
29  
30

31 We consider 4 different ways of applying interventions to 10% of the total population: (i)  
32 apply both interventions to slums, i.e. give all vaccines to slums and apply SHO only in  
33 the slums (VsSs); (ii) apply all interventions to non-slum areas (VnSn); (iii) give vaccines  
34 to slums and SHO to non-slums (VsSn) and (iv) give vaccines to non-slums and apply  
35 SHO to slums (VnSs).  
36  
37

38 For both types of intervention, the same number of individuals is chosen randomly from  
39 slum or non-slum areas. 10% of the total Delhi population amounts to 76.5% of slum  
40 population, 11.5% of the non-slum population, or a combination of 38.25% of the slum  
41 and 5.75% of the non-slum population (i.e. half from slums and half from non-slums).  
42 Figure 5 shows the mean cumulative infection rates, as well as the number of infected  
43 from the entire population of Delhi, the slums, and non-slum areas under each of the  
44 four scenarios.  
45  
46  
47

48 The results in Figure 5 indicate that the mean infection rates are the lowest when  
49 vaccines are given to slums and social distancing is applied to non-slums, or both  
50 vaccines and social distancing are applied to slums. The benefits primarily accrue to the  
51 slum population because it drives down the fraction of infected slum residents from 0.74  
52 to 0.55 or 0.58. Also, as described in the context of Figures 4 and S6 above, social  
53 distancing of the non-slum residents helps to isolate them from the infected slum  
54 residents. This effect also bears on the following.  
55  
56  
57  
58  
59  
60

1 Main manuscript

2  
3 Note that vaccination is more effective in slums (top 2 rows) than in non-slums (3<sup>rd</sup> and  
4 4<sup>th</sup> rows from top) in reducing infections among slums and in the overall population.  
5 Although non-slums are marginally better off (compared to the base case), the overall  
6 infection rate drops and the slum population is significantly better off, leading to a  
7 Pareto-optimal situation. This is a counterintuitive result, since the density of population  
8 is much higher in the slums, which may lead to the belief that social distancing in slums  
9 will break up the dense clusters. However, a careful examination shows that keeping  
10 slum residents home is not an effective social distancing strategy because their family  
11 size is, on average, almost 3 times larger than the family size of non-slum  
12 households.[27] The high level of mixing at home makes social distancing ineffective in  
13 slums unless the infected individual is completely isolated. However, complete isolation  
14 is not viable in slum areas where the entire household may live in a single room.  
15  
16  
17

18  
19 Figure 5 goes here

## 20 21 22 **DISCUSSION**

23  
24 With slum populations expected to grow to 2 billion by 2030,[37] it is becoming  
25 increasingly urgent to understand how to control the spread of infectious diseases in  
26 slum areas and measure its effect on urban populations. To our knowledge, a detailed  
27 study of interventions to control Influenza epidemics in slums, using an agent-based  
28 simulation model, has never been done before. Slum conditions are important for a city  
29 beyond the direct effects of disease transmission. For example, civil wars may be  
30 precipitated or exacerbated by disease outbreaks because they decrease social health  
31 and welfare. [38]  
32  
33

34  
35 Even though slum regions contain only 13% of the total population of Delhi, Chen et  
36 al.[4] show that omitting their attributes leads to underestimation of the overall infection  
37 rate and the peak infection rate of the epidemic. This paper extends that work by  
38 evaluating the differential impact of interventions on slum and non-slum regions.  
39 Various vaccination and social distancing strategies are analyzed under different  
40 scenarios that show that the slum population is more prone to infections under the same  
41 control measures. Furthermore, taking account of slum populations significantly alters  
42 the disease dynamics in the *entire* population. Differences in key measures are  
43 demonstrated between the cases of accounting for slum populations and not: e.g., a  
44 100% increase in the peak attack rate in some cases when slum regions' characteristics  
45 are taken into account, compared to the case when they are ignored.  
46  
47  
48

49  
50 Figure 4, which compares infections in slum with non-slum areas, shows that at very  
51 high compliance rates, some interventions can be equally effective in both slums and  
52 non-slums. However, such high compliance rates are typically not feasible due to  
53 practical realities on the ground, and also because they require timely diagnosis of  
54 infected cases. For SHO to be effective, the coverage rate needs to be 70% or more in  
55 both slums and non-slums, and the diagnosis of the infected individuals needs to be  
56 correct and immediate. In other words, effective control of a contagious epidemic in a  
57  
58  
59  
60

1 Main manuscript

2  
3 high density place like Delhi, would require either early and drastic action (e.g. ISO) or a  
4 highly compliant set of individuals, or a combination of these features.  
5

6  
7 This work overall demonstrates the power of agent-based and population modeling to  
8 evaluate complicated interaction-based epidemiological phenomena. Clearly, there are  
9 limitations to this work (noted above). But these agent and population approaches  
10 provide a platform for adding additional complexity. All of the figures demonstrate that  
11 quantitative results depend on complicated interplay among inputs. These results are  
12 important because they inform policy decisions. An equally important benefit of this type  
13 of work, but not often stated, is developing intuition about epidemic dynamics (in this  
14 case, with the effects of slums), to enable decision makers to reason about nuanced  
15 interactions among effects to a degree that is hard to obtain with other approaches that  
16 lack this level of detail.  
17  
18

19  
20 Despite this being the first work of its kind—to model the outbreak of influenza in a city-  
21 level population, along with a host of intervention strategies and parameter values, that  
22 includes the effects of slum populations—there are limitations of this work and areas for  
23 improvement and for future work. For example: (1) Examination of different population  
24 level base attack rates. (2) Different susceptibilities and infectivity for individual agents;  
25 e.g., based on age. (3) Effects of asymptomatic infections (although we have addressed  
26 this to some extent with compliance and efficacy of interventions). (4) Seasonal  
27 effects.[39-40] (5) Effects of immunity for an individual from previous infections (in  
28 previous seasons). (6) Evaluation of interaction of different strains from season to  
29 season. (7) Comparison of tropical versus subtropical factors. (8) Evaluation of a  
30 specific outbreak scenario. (9) Impact of sickness on absenteeism from work and its  
31 economic ramifications. (10) Effects on rural versus urban populations. (11) Using  
32 combinations of interventions rather than one at a time; this was only done here in  
33 Figure 5. However, to disambiguate results, it is prudent to first examine individual  
34 interventions. (12) To capture close-proximity airborne transmission, one could use  
35 actual physical proximity. Here, we use colocation.  
36  
37  
38  
39

40 Returning to the practical implications and recognizing this work's limitations, this  
41 research demonstrates that modeling slum populations is important, not only for  
42 understanding disease dynamics, but also for designing effective control measures.  
43 Ignoring the influence of slum characteristics on their urban environment will  
44 significantly underestimate the speed of an outbreak and its extent, and hence will lead  
45 to misguided interventions by public health officials and policy planners. This research  
46 also analyzes the effect of different intervention strategies on slum and non-slum  
47 subpopulations. Under limited resources, policymakers should give special  
48 consideration to slums in order to control the spread in not only the slum areas, but also  
49 the city as a whole. Given the large family size and high population density in the slum  
50 regions, it is harder to break up the social network through social distancing strategies.  
51 This research provides simulation-based evidence that it may be more effective to  
52 concentrate pharmaceutical resources in the slum regions to control the epidemic. The  
53 social distancing strategies are ineffective in slums because of a large number of  
54 contacts at home. Unless one applies complete isolation, which is not feasible in slums,  
55  
56  
57  
58  
59  
60



Main manuscript

unless isolation is orchestrated by health professional, just staying at home still keeps a large number of contacts and pathways of spread intact.

For peer review only

1  
2  
3  
4  
5  
6  
7  
8  
9  
10  
11  
12  
13  
14  
15  
16  
17  
18  
19  
20  
21  
22  
23  
24  
25  
26  
27  
28  
29  
30  
31  
32  
33  
34  
35  
36  
37  
38  
39  
40  
41  
42  
43  
44  
45  
46  
47  
48  
49  
50  
51  
52  
53  
54  
55  
56  
57  
58  
59  
60

1 Main manuscript  
2  
3

4 **Contributorship statement**

5 AA, SE, CK, AM, MM, SS, AV designed and conceived the study. SC carried out the  
6 experiments and simulations. SC, CK, AM performed data analysis. SG, CK, BL, AM,  
7 MM, EKN, MLW helped with reviewing the results and writing the paper.  
8  
9

10  
11  
12 **Competing Interests**

13 There are no competing interests.  
14  
15

16  
17 **Funding statement**

18 This work has been partially supported by the Defense Threat Reduction Agency  
19 (DTRA) (grant no. HDTRA1-11-1-0016 and HDTRA1-11-D-0016-0001), National  
20 Institutes of Health (NIH) (grant no. 1R01GM109718) and National Science Foundation  
21 (NSF) (grant no. CCF-1216000, CNS-1011769, and NRT-DESE-154362).  
22  
23  
24

25  
26 **Data Sharing Statement**

27 Data pertaining to figures and statistical analysis are partially provided in the  
28 supplementary file, and also can be obtained by contacting the corresponding author  
29 through email.  
30  
31  
32  
33  
34  
35  
36  
37  
38  
39  
40  
41  
42  
43  
44  
45  
46  
47  
48  
49  
50  
51  
52  
53  
54  
55  
56  
57  
58  
59  
60

Main manuscript

## REFERENCES

1. Thompson WW, Shay DK, Weintraub E, Brammer L, Cox N, Anderson LJ, Fukuda K. Mortality associated with influenza and respiratory syncytial virus in the United States. *JAMA* 2003 Jan 8;289(2):179-186.
2. Thompson WW, Shay DK, Weintraub E, Brammer L, Bridges CB, Cox NJ, Fukuda K. Influenza-associated hospitalizations in the United States. *JAMA* 2004 Sep 15;292(11):1333-1340.
3. Chandra N. Influenza viruses circulate in Delhi throughout the year. March 2012. <http://indiatoday.intoday.in/story/influenza-viruses-circulate-in-delhi-throughout-the-year/1/179252.html>
4. Chen J, Chu S, Chungbaek Y, Khan M, Kuhlman C, Marathe A, Mortveit H, Vullikanti A, Xie D. Effect of modelling slum populations on influenza spread in Delhi. *BMJ Open* 2016a Sep 1;6(9):e011699.
5. Barrett C, Bisset K, Leidig J, Marathe A, Marathe M. Economic and social impact of influenza mitigation strategies by demographic class. *Epidemics* 2011 Mar 31;3(1):19-31.
6. Liao S, Ma Y, Chen J, Marathe A. Paid Sick-Leave: Is It a Good Way to Control Epidemics? International Conference on Complex Sciences 2012 Dec 5 (pp. 213-227). Springer International Publishing.
7. Dorratoltaj N, Marathe A, Lewis B, Swarup S, Eubank S, Abbas K. Cost-benefit Analysis of Vaccine-based Interventions to Control Pandemic Influenza. 3rd Conference on Modeling of Infectious Diseases. Institute of Mathematical Sciences, Chennai, India, November 2015.
8. Peasah SK, Purakayastha DR, Koul PA, Dawood FS, Saha S, Amarchand R, Broor S, Rastogi V, Assad R, Kaul KA, Widdowson MA, Lal RB, Krishnan A. [The cost of acute respiratory infections in Northern India: a multi-site study](#). *BMC Public Health* 2015; 15: 330. Published online 2015 April 7.
9. WHO. Influenza vaccines. WHO position paper. *Weekly Epidemiol Record* 2005; 80(33):279-87.
10. Integrated Disease Surveillance Program, Influenza Surveillance Lab Network. URL: <http://idsp.nic.in/index1.php?lang=1&level=1&sublinkid=5789&lid=3722>
11. Broor S, Krishnan A, Roy DS, Dhakad S, Kaushik S, Mir MA, Singh Y, Moen A, Chadha M, Mishra AC, Lal RB. Dynamic patterns of circulating seasonal and pandemic A(H1N1)pdm09 influenza viruses from 2007–2010 in and around Delhi, India. *PLoS ONE* 2012 Jan 2;7(1):e29129.

## Main manuscript

12. Chadha MS, Broor S, Gunasekaran P, Potdar VA, Krishnan A, Chawla - Sarkar M, Biswas D, Abraham AM, Jalgaonkar SV, Kaur H, Klimov A. Multisite virological influenza surveillance in India: 2004–2008. *Influenza and other respiratory viruses* 2012 May 1;6(3):196-203.
13. Chadha MS, Hirve S, Dawood FS, Lele P, Deoshatwar A, Sambhudas S, Juvekar S, LaFond KE, Mott JA, Lal RB, Mishra AC. Burden of seasonal and pandemic influenza-associated hospitalization during and after 2009 A (H1N1) pdm09 pandemic in a rural community in India. *PloS ONE* 2013 May 15;8(5):e55918.
14. Nijman J. A study of space in Mumbai's slums. *Tijdschrift voor Economische en Sociale Geografie* 2010 Feb 1;101(1): 4-17.
15. Lofgren E, Fefferman NH, Naumov YN, Gorski J, Naumova EN. Influenza seasonality: underlying causes and modeling theories. *Journal of Virology* 2007 Jun 1;81(11):5429-36.
16. Baker M, McNicholas A, Garrett N, Jones N, Stewart J, Koberstein V, Lennon D. Household crowding a major risk factor for epidemic meningococcal disease in Auckland children. *The Pediatric Infectious Disease Journal* 2000 Oct 1;19(10):983-90.
17. Burström B, Diderichsen F, Smedman L. Child mortality in Stockholm during 1885–1910: the impact of household size and number of children in the family on the risk of death from measles. *American Journal of Epidemiology* 1999 Jun 15;149(12):1134-41.
18. Souza LS, Ramos EA, Carvalho FM, Guedes VM, Souza LS, Rocha CM, Soares AB, Velloso LD, Macedo IS, Moura FE, Siqueira M. Viral respiratory infections in young children attending day care in urban Northeast Brazil. *Pediatric Pulmonology* 2003 Mar 1;35(3):184-191.
19. Gulyani S, Bassett EM, Talukdar D. A tale of two cities: A multi-dimensional portrait of poverty and living conditions in the slums of Dakar and Nairobi. *Habitat International* 2014 Jul 31;43:98-107.
20. Acolin A, Chattaraj S, Wachter SM. Urban Governance and Development of Informality in China and India. Informal Real Estate Markets, Eugenie Birch, Shahana Chattaraj and Susan Wachter, eds, University of Pennsylvania Press, Forthcoming. 2014 Aug 18.
21. Madise NJ, Ziraba AK, Inungu J, Khamadi SA, Ezeh A, Zulu EM, Kebaso J, Okoth V, Mwau M. Are slum dwellers at heightened risk of HIV infection than other urban residents? Evidence from population-based HIV prevalence surveys in Kenya. *Health Place* 2012 Sep 30;18(5):1144-1152.

## Main manuscript

- 1  
2  
3  
4  
5  
6  
7  
8  
9  
10  
11  
12  
13  
14  
15  
16  
17  
18  
19  
20  
21  
22  
23  
24  
25  
26  
27  
28  
29  
30  
31  
32  
33  
34  
35  
36  
37  
38  
39  
40  
41  
42  
43  
44  
45  
46  
47  
48  
49  
50  
51  
52  
53  
54  
55  
56  
57  
58  
59  
60
22. Nossiter A. Cholera Epidemic Envelops Coastal Slums in West Africa. *New York Times*. Aug 22, 2012.
  23. Desai VK, Kapadia SJ, Kumar P, Nirupam S. Study of measles incidence and vaccination coverage in slums of Surat city. *Indian J Community Med* 2003 Jan 1; 28(10).
  24. Xia H, Nagaraj K, Chen J, Marathe MV. Synthesis of a high resolution social contact network for Delhi with application to pandemic planning. *Artif Intell Med* 2015; 65(2): 113-130.
  25. Barrett CL, Beckman RJ, Khan M, Anil Kumar VS, Marathe MV, Stretz PE, Dutta T, Lewis B. Generation and analysis of large synthetic social contact networks. In Winter Simulation Conference 2009 Dec 13 (pp. 1003-1014). Winter Simulation Conference.
  26. Bissett K, Cadena J, Khan M, Kuhlman CJ, Lewis B, Telionis PA. An integrated agent-based approach for modeling disease spread in large populations to support health informatics. In 2016 IEEE-EMBS International Conference on Biomedical and Health Informatics (BHI) 2016 Feb 24 (pp. 629-632). IEEE.
  27. Chen J, Chu S, Chungbaek Y, Khan M, Kuhlman C, Marathe A, Mortveit H, Vullikanti A, Xie D. Supplemental Information for Effect of Modelling Slum Populations on Influenza Spread in Delhi. *BMJ Open* 2016b Sep 1;6(9):e011699. Available at: <http://bmjopen.bmj.com/content/6/9/e011699/DC1/embed/inline-supplementary-material-1.pdf>
  28. Liao S, Ma Y, Chen J, Marathe A. Paid Sick-Leave: Is It a Good Way to Control Epidemics? International Conference on Complex Sciences: Theory and Applications, December 57, Santa Fe, New Mexico. Springer series Lecture Notes of the Institute for Computer Sciences, Social Informatics and Telecommunications Engineering. Edited by Glass, Kristin and Colbaugh, Richard and Ormerod, Paul and Tsao, Je\_rey. Complex Sciences: Springer, vol. 12 pp 213-227.
  29. Marathe A, Lewis B, Chen J, Eubank S. Sensitivity of household transmission to household contact structure and size. *PLoS ONE* 2011 Aug 1;6(8):e22461.
  30. Kaji M, Watanabe A, Aizawa H. Differences in clinical features between Influenza A H1N1, A H3N2, and B in adult patients. *Respirology* 2003;8:231–233.
  31. Meeyai A, Praditsitthikorn N, Kotirum S, Kulpeng W, Putthasri W, Cooper BS, Teerawattananon Y. Seasonal influenza vaccination for children in Thailand: a cost-effectiveness analysis. *PLoS Med* 2015 May 26;12(5):e1001829.

## Main manuscript

- 1  
2  
3  
4  
5  
6  
7  
8  
9  
10  
11  
12  
13  
14  
15  
16  
17  
18  
19  
20  
21  
22  
23  
24  
25  
26  
27  
28  
29  
30  
31  
32  
33  
34  
35  
36  
37  
38  
39  
40  
41  
42  
43  
44  
45  
46  
47  
48  
49  
50  
51  
52  
53  
54  
55  
56  
57  
58  
59  
60
32. Longini IM, Nizam A, Xu S, Ungchusak K, Hanshaoworakul W, Cummings DA, Halloran ME. Containing pandemic influenza at the source. *Science* 2005 Aug 12;309(5737):1083-1087.
33. Choudhry A, Singh S, Khare S, Rai A, Rawat DS, Aggarwal RK, Chauhan LS. Emergence of pandemic 2009 influenza A H1N1, India. *Indian J Med Res* 2012 Apr 1;135(4):534-537.
34. Gurav YK, Pawar SD, Chadha MS, Potdar VA, Deshpande AS, Koratkar SS, Hosmani AH, Mishra AC. Pandemic influenza A(H1N1) 2009 outbreak in a residential school at Panchgani, Maharashtra, India. *Indian J Med Res* 2010;132:67-71.
35. Broor S, Gupta S, Mohapatra S, Kaushik S, Mir MA, Jain P, Dar L, Lal RB. Emergence of 2009A/H1N1 cases in a tertiary care hospital in New Delhi, India. *Influenza and other respiratory viruses* 2011 Nov 1;5(6):e552-557.
36. Ramamurty N, Pillai LC, Gunasekaran P, Elango V. Influenza activity among the paediatric age group in Chennai. *Indian J Med Res* 2005 Jun 1;121(6):776-779.
37. Un-Habitat. The challenge of slums: global report on human settlements 2003. *Management of Environmental Quality: An International Journal* 2004 Jun 1; 15(3): 337-338.
38. Letendre K, Fincher CL, Thornhill R. Does infectious disease cause global variation in the frequency of intrastate armed conflict and civil war? *Biological Reviews* 2010 Aug 1;85(3):669-683.
39. Koul PA, Broor S, Saha S, Barnes J, Smith C, Shaw M, Chadha M, Lal RB. Differences in Influenza Seasonality by Latitude, Northern India. *Emerging Infectious Diseases* 2014 Oct;20(10), 1723-1726.
40. Hirve S, Newman LP, Paget J, Azziz-Baumgartner E, Fitzner J, Bhat N, Vandemaele K, Zhang W. Influenza Seasonality in the Tropics and Subtropics—When to Vaccinate? *PloS ONE* 2016 Apr 27;11(4):e0153003.

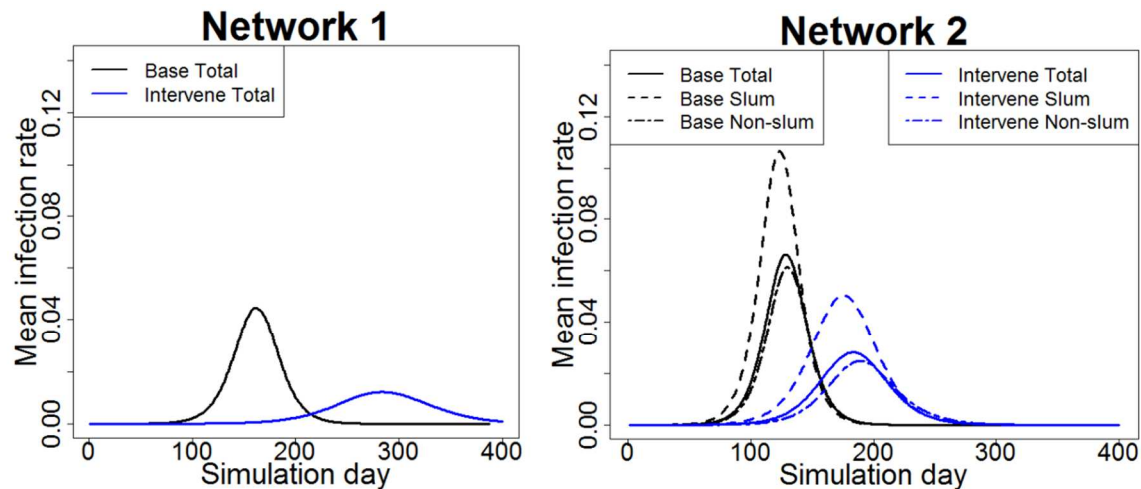

**FIGURE 1:** Epidemic curves for base case and vaccination case. The vaccines are given randomly to 30% of the entire population and the vaccine efficacy is 30%. For Network 2, epidemic curves are shown for total population and slum and non-slum subpopulations. ‘Intervene Total’ refers to the epidemic curve of the entire Delhi population when the vaccine intervention is applied. ‘Intervene Slum’ refers to the epidemic curve for just the slum population, and ‘Intervene Non-slum’ refers to the epidemic curve for just the non-slum population for the intervention case. Epidemic curves for a variety of compliances and efficacies are reported in Figures S1 and S2.

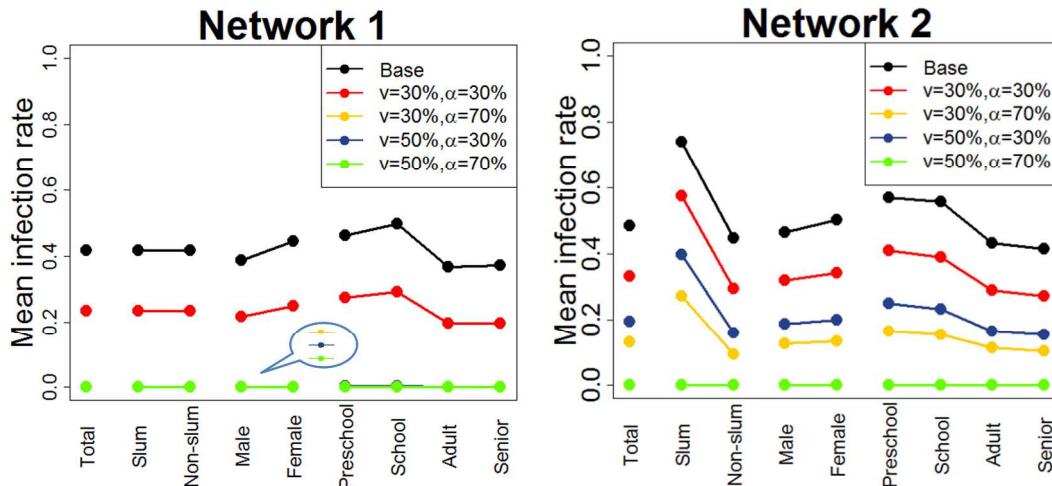

**FIGURE 2:** Mean cumulative infection rates for different subgroups in the two networks. Two vaccination rates ( $v = 30\%$ ,  $50\%$ ) and two vaccine efficacy rates ( $\alpha = 30\%$ ,  $70\%$ ) are considered. Individuals are chosen at random in the entire network for vaccination on day 0. Mean infection rates are calculated within each group. The last several lines in the plot for Network 1 are overlapping at the bottom because the mean infection rates are almost zero under those scenarios. 'Total' refers to the entire population of Delhi. 'Slum' and 'Non-slum' refer to slum and non-slum regions, respectively. 'Male' and 'Female' denote the total number of males and females in Delhi, respectively. Age groups are denoted by 'Preschool', 'School', 'Adult', and 'Senior'.



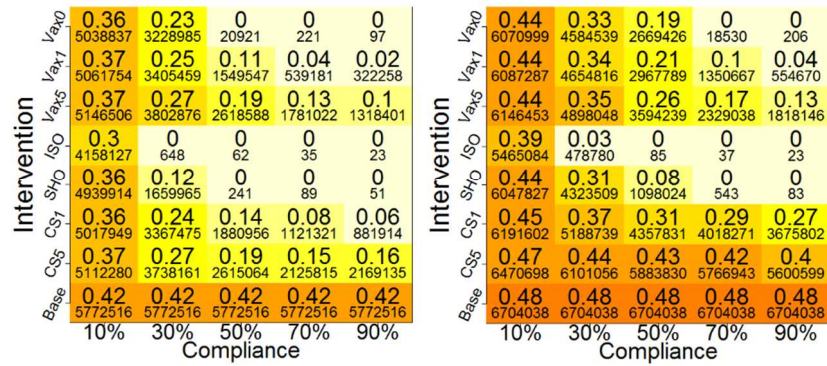

(a) Total Delhi Network 1 (b) Total Delhi Network 2

**Figure 3.** Mean cumulative infection rates under different interventions for Network 1 and Network 2. The larger font numbers are fractions of populations that are infected and the smaller font numbers are counts of infected individuals. Colors of the boxes correspond to the values of the large numbers (i.e., fractions of infected), and the same scheme is used for both plots for comparisons—and for all plots in this paper. Five different compliance rates are examined (10%, 30%, 50%, 70% and 90%), and 4 types of intervention strategies (vaccination (VAX), close-schools (CS), stay-home (SHO) and isolation (ISO)) are considered. For vaccines, three different trigger points are considered: when the cumulative infection rate reaches 0% (VAX0), 1% (VAX1) and 5% (VAX5) of the total population. The vaccine efficacy is set at 30%. For close-schools, two trigger points are used: when cumulative infection rate reaches 1% (CS1) and 5% (CS5). Compliant individuals are selected at random from the entire Delhi population, and the cumulative infection rates are calculated for each network.

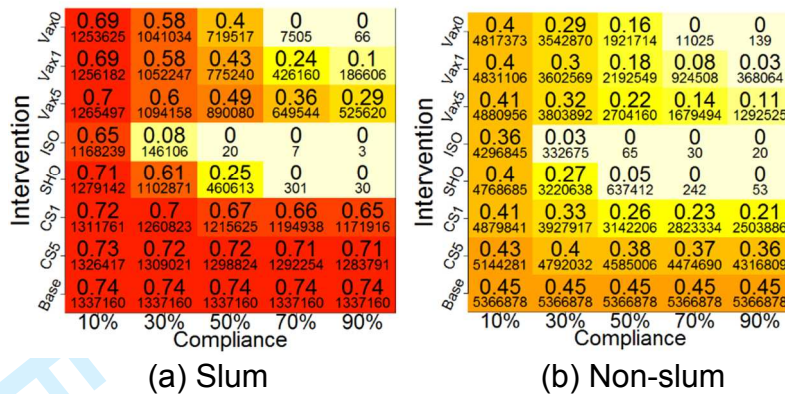

**Figure 4.** Heat map of cumulative infection rates in slum and non-slum regions of Network 2 under different intervention strategies. The colors of boxes correspond to the larger numbers in the boxes—the cumulative infection rates—and the two plots use the same scheme for comparisons. Darker colors correspond to higher infection rates. The smaller font numbers are counts of infected individuals. The vaccination efficacy is fixed at 30%. Five different compliance rates (10%, 30%, 50%, 70% and 90%) and 4 types of intervention strategies (vaccination (VAX), close-schools (CS), stay-home (SHO) and isolation (ISO)) are considered. For vaccines, three different trigger points are considered: when cumulative infection rate reaches 0% (VAX0), 1% (VAX1) and 5% (VAX5). For close-schools, two trigger points are used: when the cumulative infection rate reaches 1% (CS1) and 5% (CS5). Compliant individuals are selected randomly from the entire Delhi population, and the mean infection rates are calculated separately for the slum and non-slum subpopulations. Although not reported here, qualitatively similar results are found for other transmission rates, as well as for higher vaccine efficacy (70%). Base is the baseline case with no interventions. The smaller-font numbers under the infection rate show the actual number of infected individuals.

| Intervention | Total           | Slum            | Non-slum        |
|--------------|-----------------|-----------------|-----------------|
| VsSs         | 0.44<br>6043049 | 0.55<br>989079  | 0.42<br>5053971 |
| VsSn         | 0.43<br>5938919 | 0.58<br>1042116 | 0.41<br>4896803 |
| VnSs         | 0.44<br>6023678 | 0.67<br>1217415 | 0.40<br>4806263 |
| VnSn         | 0.44<br>6104571 | 0.72<br>1309577 | 0.40<br>4794993 |
| Base         | 0.48<br>6704038 | 0.74<br>1337160 | 0.45<br>5366878 |

**FIGURE 5:** Mean cumulative infection rates for each category listed on the x-axis, for Network 2, under four different intervention scenarios. The color scheme of the boxes are based on the large values in the boxes—the cumulative infection rates. Darker colors correspond to higher infection rates. Smaller font values are the number of infected individuals. The vaccine efficacy is set at 30%. VsSs refers to the case when vaccines and social distancing are both applied to slum residents; VnSn refers to the case when vaccines and social distancing are applied to non-slum residents. Similarly, VsSn means vaccines are given to slums and stay home is applied to non-slums; and VnSs means vaccines are given to non-slums and stay home is applied to slums. Base refers to the case where no intervention is applied. The smaller-font numbers under the infection rates show the actual number of infected individuals in each category listed on the x-axis.

## Supplemental Information

**Disparities in Spread and Control of Influenza in Slums of Delhi**

A. Adiga, S. Chu, S. Eubank, S. Gupta, C. J. Kuhlman, B. Lewis, A. Marathe, M. Marathe, E. K. Nordberg, S. Swarup, A. Vullikanti and M. L. Wilson

For peer review only

## Supplemental Information

**Presentation of Results.**

For each set of input parameters, 25 replicates were run using agent-based simulation and the results presented are the average values over the 25 replicates. Also, 95% confidence intervals (CIs) are given when appropriate.

**Comparisons Between Network 1 and Network 2.**

Table S1 shows some differences between network1 and network 2 due to their different ways of modeling slum population. Note that these two networks are the same ones as those used in Chen et al.[1]. Further comparisons between the two networks are found in Chen et al.[2].

**Table S1.** Comparison of two networks as well as data sources for slum and non-slum Delhi, India.

|                                       | Network 1      |              | Network 2                                          |            |
|---------------------------------------|----------------|--------------|----------------------------------------------------|------------|
|                                       | Slum           | Non-slum     | Slum                                               | Non-slum   |
| Population Size                       | 0              | 13.8 million | 1.8 million                                        | 12 million |
| Average Household Size of Slum Region | 5.2            |              | 15.5                                               |            |
| Daily Activities                      | 33,890,156     |              | 39,077,861                                         |            |
| Number of Edges                       | 210,428,521    |              | 231,258,772                                        |            |
| Data Sources                          | MapMyIndia.com |              | MapMyIndia.com<br>Indiamart.com<br>MapMechanic.com |            |

Network 2 contains 298 slum zones, while network 1 models the whole population as non-slum. For network 1, the non-slum demographics and activities data is collected by survey through MapMyIndia.com. While for slum population, we collected additional data by Indiamart.com and MapMechanic.com for slum demographics and activities as well as slum polygons. More detailed demographic and activity differences can be found in the Chen et al.[1]

**Terminology and Abbreviations for Interventions.**

Table S2 contains abbreviations for different interventions and their meanings. Stay-at-home (SHO) and social isolation (ISO) interventions are applied to a person immediately after they become infected, while close-schools (CS) and vaccinations (VAX) may be applied after a specified fraction of the total population has been infected.

**Table S2:** Summary of abbreviations for interventions and their meanings.

| Abbreviation | Definition                                                              |
|--------------|-------------------------------------------------------------------------|
| CS           | Close-schools: School-related interactions are eliminated.              |
| CSx          | Close-schools is implemented after the total fraction of the population |

## Supplemental Information

|      |                                                                                                                                                                                                    |
|------|----------------------------------------------------------------------------------------------------------------------------------------------------------------------------------------------------|
|      | that has been infected reaches x.                                                                                                                                                                  |
| ISO  | Social isolation: a person who is socially isolated does not interact with any other person, even people in their home. Isolation is triggered only after a person becomes infectious.             |
| SHO  | Stay at home: All out-of-the-home activities for this person are eliminated, and this person only interacts with others at home. Stay at home is triggered only after a person becomes infectious. |
| VAX  | Vaccination: a person who is vaccinated has a reduced probability of contracting the virus.                                                                                                        |
| VAXx | Vaccination of an individual occurs after the total fraction of the population that has been infected reaches x.                                                                                   |

Table S3 contains the variables used in simulations. The transmissibility corresponds to strong flu in Chen et al.[1] For vaccination, efficacy is either 30% or 70%. That is, for 30% efficacy, a person who gets vaccinated has reduced their susceptibility to infection by 30%.

**Table S3:** Summary of parameters and values used in simulations.

| Category                              | Values                                                                                                |
|---------------------------------------|-------------------------------------------------------------------------------------------------------|
| Networks of Delhi                     | Network 1 (does not model slums); Network 2 (models slums).                                           |
| Seeding                               | 20 people selected randomly over the entire population at time 0 as index cases.                      |
| Transmissibility                      | 0.000027.                                                                                             |
| Intervention approaches.              | Base case (no intervention); close-schools (CS); stay-home (SHO); isolation (ISO); vaccination (VAX). |
| Intervention/compliance rates.        | 10%, 30%, 50%, 70%, 90%.                                                                              |
| Efficacy of vaccination intervention. | 30%, 70%.                                                                                             |
| Intervention trigger time             | Cumulative infection rate reaches 0%, 1% and 5%.                                                      |
| Simulation replicates                 | 25                                                                                                    |

### The Agent Epidemic States and Disease Model.

An SEIR, Susceptible (S), Exposed (E), Infectious (I) and Removed or Recovered (R) model is considered within each individual. An infectious person spreads the disease to each susceptible neighbor independently with a probability referred to as the transmission probability, given by

$$p = \lambda (1 - (1 - \tau)^{\Delta t}),$$

where  $\lambda$  is a scaling factor to lower the probability (e.g., in the case of vaccination),  $\tau$  is the transmissibility and  $\Delta t$  is the duration of interaction in minutes. Durations of contact are labels on the network edges. A susceptible person undergoes independent trials

## Supplemental Information

from all of its neighbors that are infectious. The transmission probability is a function of the number and duration of contacts.[3] This is selected to simulate an Influenza model resulting in a  $R_0=1.26$  (cumulative attack rate 42%, corresponding to a transmissibility of 0.000027 per minute of contact time) for Network 1, and  $R_0=1.39$  (cumulative attack rate 48%) for Network 2.[4] This transmissibility value is used uniformly throughout this study and corresponds to the probability at which an infectious node infects a susceptible node per minute of contact.

At each time (day), if an infectious person infects a susceptible person, the susceptible person transitions to the exposed (or incubating) state. The exposed person has contracted Influenza but cannot yet spread it to others. The incubation period is assigned per person, according to the following distribution: 1 day (30%); 2 days (50%); 3 days (20%). At the end of the exposed or incubation period, the person switches to an infected state. The duration of infectiousness is assigned per person, according to the distribution: 3 days (30%); 4 days (40%); 5 days (20%); 6 days (10%). After the infectious period, the person recovers and stays healthy for the simulation period. This sequence of state transitions is irreversible and is the only possible disease progression.

### Epidemic Curves for Other Interventions, for Varying Efficacy and Compliances.

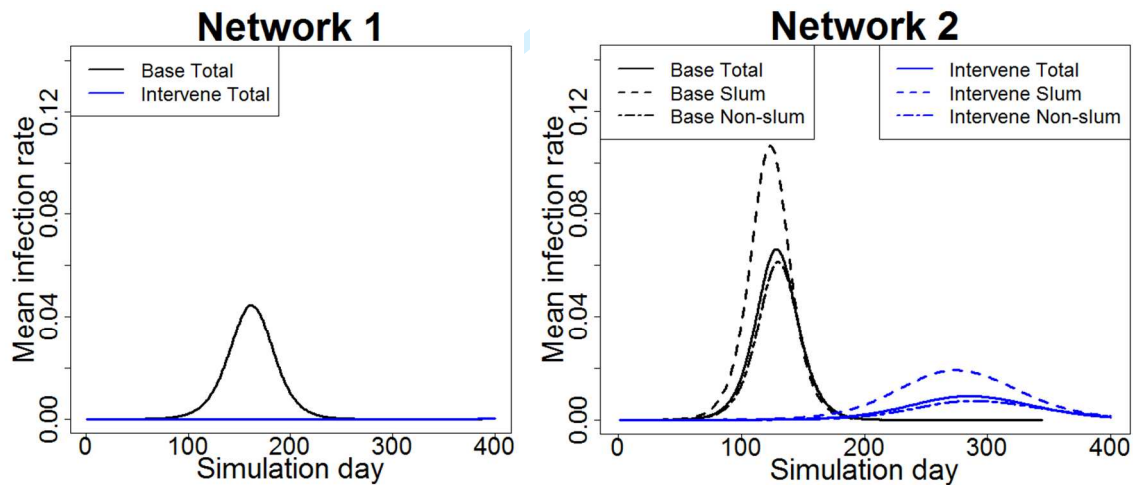

**Figure S1:** Epidemic curves for the base case and the vaccination case. The vaccines are given randomly to 50% of the entire population, and the vaccine efficacy is assumed to be 30%. The transmissibility is 0.000027.

Supplemental Information

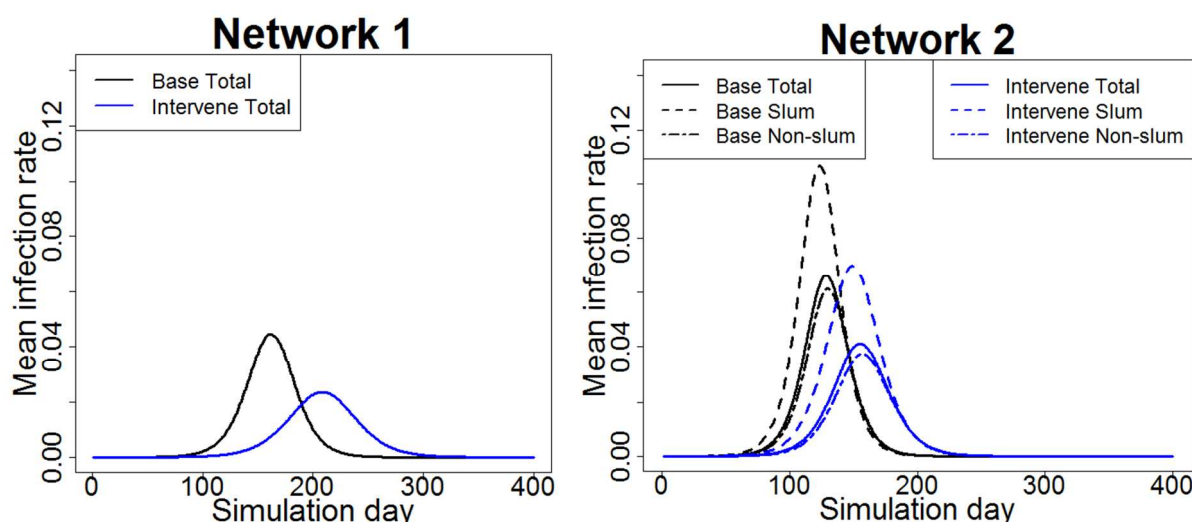

**Figure S2:** Epidemic curves for the base case and vaccination case. The vaccines are given randomly to 10% of the entire population and the vaccine efficacy is 70%. The transmissibility is 0.000027.

**Tabulations of Basic Results: Comparisons between Networks 1 and 2 for Compliance of 30% and Efficacy of 30%.**

Table S4 summarizes differences in key epidemic parameters for Networks 1 and 2 for the base case with no interventions. The peak infection rate is the maximum fraction of individuals who are infected on any day, the time to peak is the day on which the peak infection rate occurs, and cumulative infection rate is the cumulative fraction of individuals who get infected in the epidemic. Under the base case, the peak infection rate in Network 2 is 47.6% (95% CI: 47.4%-47.8%) greater compared to that in Network 1 (47.6%=(6.87%-4.65%)/4.65%). The time to peak infection for Network 2 is decreased by 20.8% (95% CI: 19.2%-22.7%) compared to that in Network 1. The cumulative infection rate (or attack rate) is also underestimated under Network 1 by 16.1% (95% CI: 16.1%-16.2%) compared to Network 2. These results, presented in the main paper, are tabulated here in Table S4 for convenience and comparison.

**Table S4:** Comparisons of key epidemic parameters for Networks 1 and 2 for the base case.

| Base                      | Network 1 | Network 2 | Compare-absolute                  | Compare-relative                  |
|---------------------------|-----------|-----------|-----------------------------------|-----------------------------------|
| Time to Peak              | 162       | 128       | 34<br>(95% CI: 31-37)             | 20.84%<br>(95% CI: 19.19%-22.71%) |
| Peak Infection Rate       | 4.65%     | 6.87%     | 2.215%<br>(95% CI: 2.206%-2.224%) | 47.6%<br>(95% CI: 47.4%-47.8%)    |
| Cumulative Infection Rate | 41.70%    | 48.43%    | 6.73%<br>(95% CI: 6.71%-6.75%)    | 16.1%<br>(95% CI: 16.1%-16.2%)    |



## Supplemental Information

Table S5 shows results when 30% of the population that is selected uniformly at random is vaccinated with a vaccine that is 30% effective. The contrast between the two populations is even greater when considering interventions. The peak infection rate of the entire population increases by 123.2% (95% CI: 122.7%-123.7%) in Network 2 compared to Network 1 for the intervention, versus 47.6% difference between the networks in Tables S4. The time to peak decreases by 35.7% (95% CI: 32.9%-38.8%) in Network 2 compared to that in Network 1, for the intervention case, compared to only 20.84% percentage change between the two Networks for the base case in Table S4. The cumulative infection rate (or attack rate) is also underestimated, which is 42.2% (95% CI: 41.5%-42.8%) greater on average in Network 2 compared to Network 1 for the intervention case. Hence, the differences between key epidemic results for Networks 1 and 2 that are generated for the intervention case are even more pronounced than they are for the base case. These values are all statistically significant.

**Table S5:** Comparisons of key epidemic parameters for Networks 1 and 2 for a vaccination intervention before the epidemic starts (VAX0), where the vaccine efficacy is 30% and the compliance rate is 30%.

| Vaccination               | Network 1 | Network 2 | Compare-absolute               | Compare-relative                     |
|---------------------------|-----------|-----------|--------------------------------|--------------------------------------|
| Time to Peak              | 286       | 184       | 102<br>(95% CI: 94-111)        | 35.7%<br>(95% CI: 32.9%-38.8%)       |
| Peak Infection Rate       | 1.34%     | 2.99%     | 1.65%<br>(95% CI: 1.64%-1.66%) | 123.19%<br>(95% CI: 122.69%-123.65%) |
| Cumulative Infection Rate | 23.3%     | 33.1%     | 9.82%<br>(95% CI: 9.67%-9.96%) | 42.17%<br>(95% CI: 41.51%-42.77%)    |

### Effect of intervention on Networks 1 and 2 individually.

Tables S6 and S7 show that, generally, Network 1 is more responsive to intervention than Network 2. In Network 1, the percentage changes in time-to-peak, peak infection rate, and cumulative infection rate, due to intervention, are 76.4%, -71.2%, and -44.1%, respectively. For Network 2, these values are 43.3%, -56.5%, and -31.6%, respectively. The reason for lower impact in Network 2 is the greater connectivity of households in slums, which helps drive the contagion.

### Network 1, With and Without Interventions.

In Network 1, vaccination delays the time to peak infection by 76.41%, from 162 to 286 days on average, with 95% CI: 71.53%-81.28%. The peak infection rate is reduced by 3.3121 percentage points, from 1.34% to 4.65%, which is a relative percentage difference (RPD) of -71.20%, with 95% CI: -71.02% to -71.38%. These and cumulative infection rate data are given in Table S6.

**Table S6:** Comparisons of a vaccination intervention (30% vaccination rate, 30% efficacy of a vaccination) with the base case in Network 1 Delhi.

| Network 1, Total | Base | Vaccination | Compare-absolute         | Compare-relative           |
|------------------|------|-------------|--------------------------|----------------------------|
| Time to Peak     | 162  | 286         | 124<br>(95% CI: 116-132) | 76.41%<br>(95% CI: 71.53%- |

## Supplemental Information

|                           |       |       |                                       |                                       |
|---------------------------|-------|-------|---------------------------------------|---------------------------------------|
|                           |       |       |                                       | 81.28%)                               |
| Peak Infection Rate       | 4.65% | 1.34% | 3.31%<br>(95% CI: 3.30%-<br>3.32%)    | 71.20%<br>(95% CI: 71.02%-<br>71.38)  |
| Cumulative Infection Rate | 41.7% | 23.3% | 18.40%<br>(95% CI: 18.25%-<br>18.55%) | 44.13%<br>(95% CI: 43.77%-<br>44.48%) |

**Network 2, With and Without Interventions.**

The comparison between vaccination intervention and the base case in Network 2 is detailed in Table S7 below.

In Network 2, for the total population, vaccination delays the time to peak infection by 43.27% (95% CI: 40.14%-46.41%) relatively, from 128 to 184 days on average, while the peak infection rate is reduced by about 3.88% from 2.99% to 6.87% on average (56.47% relatively with 95% CI: 56.35%-56.56%). The total infection rate is reduced by 15.31% from 33.12% to 48.43% (31.62% relatively with 95% CI: 31.57%-31.67%).

In slum regions in Network 2, vaccination delays the time to peak infection by 43.09% (95% CI: 39.78%-46.4%) relatively, from 123 to 176 days on average, while the peak infection rate is reduced by about 5.70% from 5.42% to 11.12% on average (51.26% relatively with 95% CI: 50.88%-51.64%). The total infection rate in slums is reduced by 16.35% from 57.53% to 73.88% (22.13% relatively with 95% CI: 22.07% to 22.19%).

In non-slum regions in Network 2, the time to peak is delayed by 43.44% (95% CI: 40.32%-46.56%) relatively, from 130 to 186 days on average, while the peak infection rate is reduced by about 3.68% from 2.69% to 6.36% on average (57.79% relatively with 95% CI: 57.64%-57.94%). The total infection rate in non-slums is reduced by 15.16% from 44.60% to 29.45% (33.98% relatively with 95% CI: 33.93% -34.03%).

**Table S7:** Comparisons between the base and vaccination cases for Network 2. The three parameters (time to peak, peak infection rate and cumulative infection rate) are broken out, and for each, values for the total population, and slum and non-slum subpopulations are given. The vaccination rate is 30% and efficacy is 30% for those receiving the vaccine.

| Network 2, Time to Peak | Base | Vaccination | Compare-absolute   | Compare-Relative                       |
|-------------------------|------|-------------|--------------------|----------------------------------------|
| Total                   | 128  | 184         | 55 (95% CI: 51-59) | 43.27%<br>(95% CI: 40.14%-46.41%)      |
| Slum                    | 123  | 176         | 53 (95% CI: 49-57) | 43.09%<br>(95% CI: 39.78%-46.4%)       |
| Non-Slum                | 130  | 186         | 56 (95% CI: 52-60) | 43.44%<br>(95% CI: 40.32% -<br>46.56%) |

## Supplemental Information

| Network 2,<br>Peak Infection<br>Rate | Base   | Vaccination | Compare-absolute                    | Compare-Relative                     |
|--------------------------------------|--------|-------------|-------------------------------------|--------------------------------------|
| Total                                | 6.87%  | 2.99%       | -3.88%<br>(95% CI: -3.870% -3.884%) | -56.46%<br>(95% CI: -56.35% -56.56%) |
| Slum                                 | 11.12% | 5.42%       | -5.70%<br>(95% CI: -5.66% -5.74%)   | -51.26%<br>(95% CI: -50.88% -51.64%) |
| Non-Slum                             | 6.36%  | 2.69%       | -3.68%<br>(95% CI: -3.67% -3.69%)   | -57.79%<br>(95% CI: -57.64% -57.94%) |

| Network 2,<br>Cumulative<br>Infection Rate | Base   | Vaccination | Compare-absolute                     | Compare-Relative                     |
|--------------------------------------------|--------|-------------|--------------------------------------|--------------------------------------|
| Total                                      | 48.43% | 33.12%      | -15.31%<br>(95% CI: -15.29% -15.34%) | -31.62%<br>(95% CI: -31.57% -31.67%) |
| Slum                                       | 73.88% | 57.53%      | -16.35%<br>(95% CI: -16.30% -16.39%) | -22.13%<br>(95% CI: -22.07% -22.19%) |
| Non-Slum                                   | 44.60% | 29.45%      | -15.16%<br>95% CI: (-15.14% -15.18%) | -33.98%<br>(95% CI: -33.93% -34.03%) |

### Effect of interventions on slum and non-slum subpopulations of Network 2, compared to the base case.

The data used in comparing key outbreak parameters in slum and non-slum regions are taken from Table S7, and the corresponding epidemic curves are in Figure 1. The percentage change in peak infection rate due to intervention in slum (-51.3%) and non-slum (-57.8%) regions in Network 2, are comparable, although the magnitudes of the peak infections in slums are about twice those in the non-slum regions. For the cumulative infection rates, the relative drop from the intervention is greater for the non-slum (-34.0% vs. -22.1%) population than it is for the slum population, but the absolute drop is about the same (-16.3% vs. -15.1%).

**Table S8:** Comparison of results between slum and non-slum in Network 2. The input data is the same as in Table S7.

| Network 2,<br>Base     | Slum   | Nonslum | Compare-absolute               | Compare-relative                      |
|------------------------|--------|---------|--------------------------------|---------------------------------------|
| Time to Peak           | 123    | 130     | 7(95% CI: 4-9)                 | 5.26%<br>(95% CI: 3.37%-7.16%)        |
| Peak Infection<br>Rate | 1.12%  | 6.36%   | 4.76%<br>(95% CI: 4.72%-4.80%) | 42.79%<br>(95% CI: 42.46%-<br>43.14%) |
| Cumulative             | 73.88% | 44.60%  | 29.25%                         | 39.63%                                |

Supplemental Information

|                |  |  |                           |                         |
|----------------|--|--|---------------------------|-------------------------|
| infection rate |  |  | (95% CI: 29.25% - 29.31%) | (95% CI: 39.59%-39.67%) |
|----------------|--|--|---------------------------|-------------------------|

| Network 2, Vaccination    | Slum   | Nonslum | Compare-absolute                  | Compare-relative                  |
|---------------------------|--------|---------|-----------------------------------|-----------------------------------|
| Time to Peak              | 176    | 186     | 10(95% CI: 5-15)                  | 5.23%<br>(95% CI: 2.58%-8.46%)    |
| Peak Infection Rate       | 5.42%  | 2.69%   | 2.74%<br>(95% CI: 2.71% - 2.76%)  | 50.46%<br>(95% CI: 50.06%-50.86%) |
| Cumulative infection rate | 57.53% | 29.45%  | 28.08%<br>(95% CI: 28.04%-28.12%) | 48.82%<br>(95% CI: 48.74%-48.89%) |

Figure S3 contains the percentage changes between the base case and intervention case for Networks 1 and 2 for the three parameters in the legend, and further breaks down Network 2 into slum and non-slum subpopulations. This plot provides a summary of differences between the base and intervention cases. For all four conditions considered, the intervention reduces the severity of an epidemic. It delays the time when the infection peaks, and reduces the peak infection and the cumulative infection rates. Note that the intervention has a larger effect on the epidemics when applied to Network 1, as consistent with Figure 1.

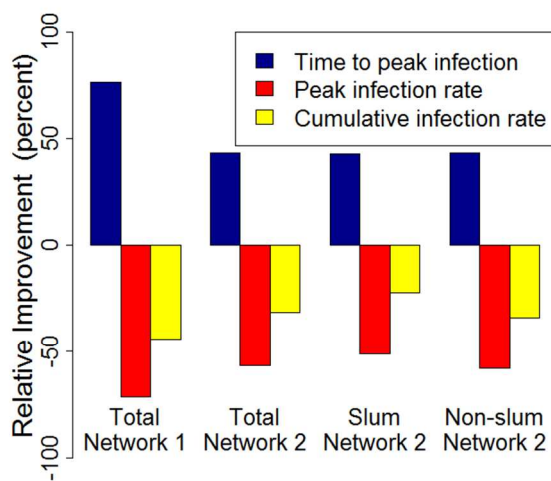

**Figure S3:** Effects of vaccination on time to peak infection, peak infection rate, and cumulative infection rate. The intervention is 30% vaccination rate and 30% vaccine efficacy. Each bar refers to the average value of the relative difference over 25 runs. Vaccination is more effective for Network 1 than Network 2, while, for Network 2, it is slightly more effective for the non-slum population than slum. Details of the data associated with this plot are provided in Tables S6 and S7.

Figure S4 provides the same data in as in Figure S6, but now the data are provided as absolute differences, rather than as percentage changes. (There are three separate plots owing to the different ranges in absolute differences. Qualitatively, the time to peak infection (blue bars) does not change between the two networks and the two

## Supplemental Information

subpopulations of Network 2 (Figure S3 versus Figure S4(a)). However, the red bars in Figure S3 are qualitatively different from those in Figure S4(b), when considering absolute changes. That is, the magnitude of the percentage change in peak infection rate between the base and intervention cases is greatest in Network 1 (Figure S3, red bars), while in Figure S4(b), it is least on an absolute change basis. Similarly, the slum population in Network 2 shows the least percentage change in Figure S3, but the greatest absolute change in Figure S4(b). Rankings of the subpopulations in Network 2 is also reversed for cumulative infection rate: the percentage change is greatest in the non-slum region, while it is greatest for the slum regions in absolute terms.

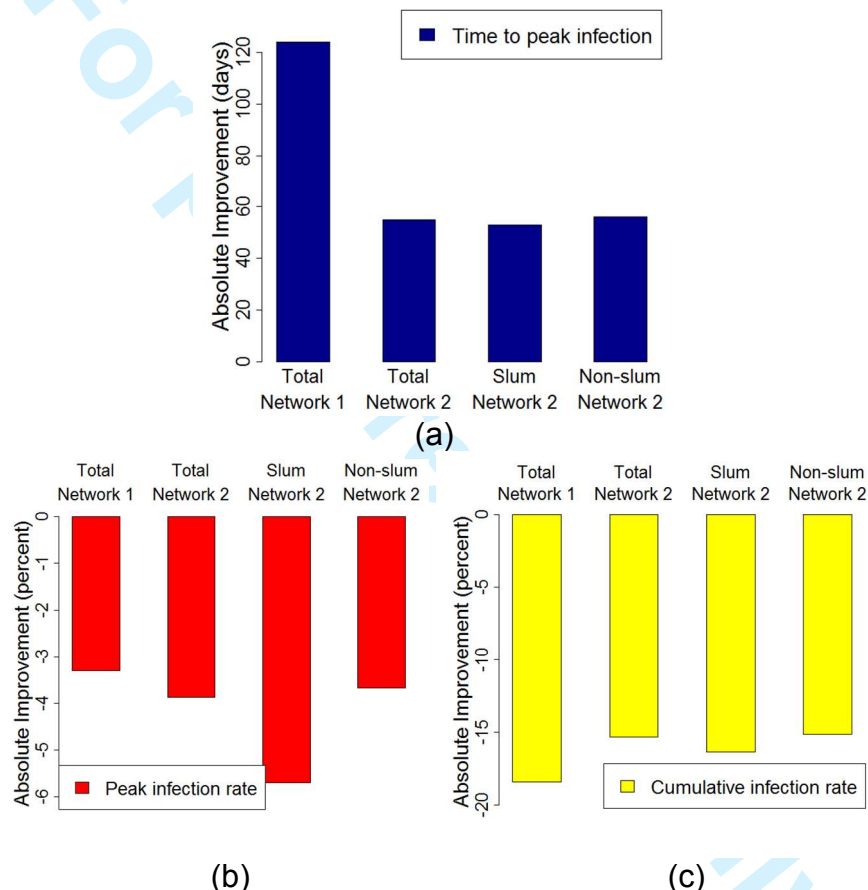

**Figure S4:** Comparison of absolute difference in improvement; the relative differences are shown in Figure S6. Absolute differences vary across the three parameters, so each is given on a separate scale. Data are summarized in Tables S6 and S7.

Supplemental Information

**Evaluation of Network 2 Home and School Contacts.**

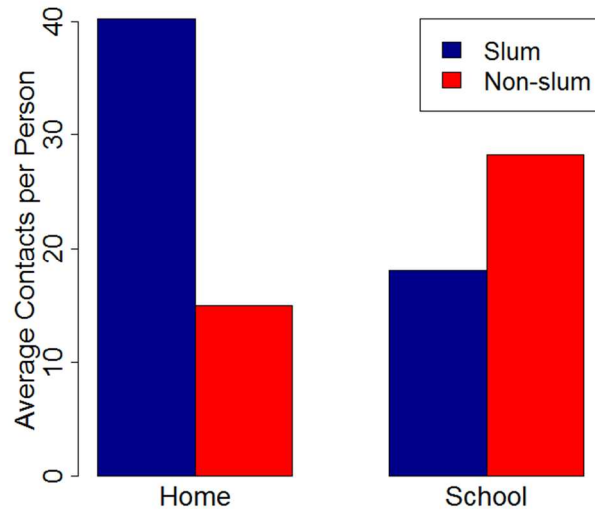

**Figure S5:** Comparison of average contacts per person in slum and non-slum regions for home and school activity types in Network 2.

**Evaluation of Network 2 Edges Transmitting Infection.**

Figure S6 provides counts of edges used to transmit infection for a base case simulation in Network 2 of Figure 1 of the main text. Edges are broken down by activity types of people who are interacting during transmission. Data are also broken down by the classifications of individuals interacting (e.g., slum and nonslum, see legend).

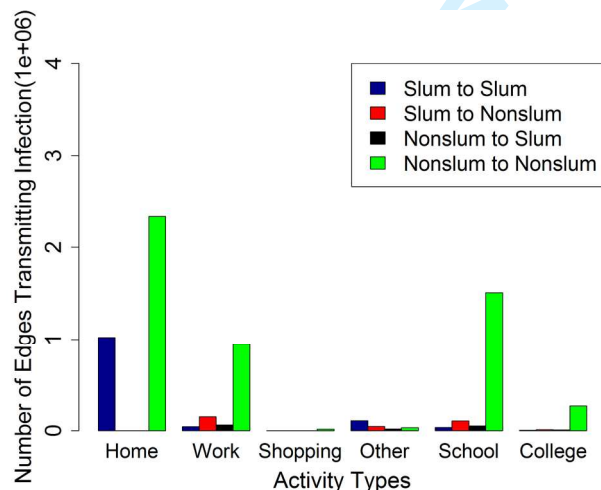

**Figure S6.** Data for Network 2. Number of edges transmitting infection (in millions) for each of the four types of interactions between slum and nonslum individuals (see legend) and for each activity type. The number of slum-to-nonslum edges is greater

## Supplemental Information

than nonslum-to-slum ones because once infection gets into a slum household, it may spread within the household more (because there are more people and connections). Thus, a slum household carries more infection to its interactions with nonslum people. The “Other” activity category, like home activity, shows more edges carrying infection for slum-to-slum interactions than slum-to-nonslum, which is consistent with Figures S4 and S6 of Chen et al.[2], where further network characteristics are given.

Table S9 shows the effect of delay in applying interventions. The numbers show the percentage difference in cumulative infection rate in slums and non-slums of Network 2 for the specified interventions and compliance rates at different trigger levels. For example, the value 30.55% at 0.1% compliance means that for intervention close-schools, where this intervention is implemented after 5% of the total population is infected, the fraction of people in slums that get infected is 30.55% greater than the fraction of non-slum residents who get infected.

**Table S9.** Differences of epidemic size between slum and non-slum regions for Network 2 for base case (no intervention); close-schools (CS) after 1% total outbreak fraction (CS1) and after 5% total outbreak fraction (CS5); stay at home (SHO); social isolation (ISO); vaccination (VAX) after 1% total outbreak fraction (VAX1) and after 5% total outbreak fraction (VAX5), under various compliance rates. The vaccination efficacy is 30%.

| Compliance | Base   | CS5    | CS1    | SHO    | ISO    | VAX5   | VAX1   |
|------------|--------|--------|--------|--------|--------|--------|--------|
| 0.1        | 29.30% | 30.55% | 31.94% | 31.06% | 28.85% | 29.37% | 29.27% |
| 0.3        | 29.30% | 32.52% | 37.03% | 34.18% | 5.31%  | 28.85% | 28.21% |
| 0.5        | 29.30% | 33.67% | 41.07% | 20.16% | 0.00%  | 26.72% | 24.62% |
| 0.7        | 29.30% | 34.23% | 42.57% | 0.01%  | 0.00%  | 21.94% | 15.87% |
| 0.9        | 29.30% | 35.07% | 43.95% | 0.00%  | 0.00%  | 18.31% | 7.25%  |

Table S10 examines the difference in effects of interventions on the cumulative infection rate in Network 2. These data use both the stay home (SHO) and the isolation (ISO) interventions as base cases. Each entry represents the difference between the cumulative infection rates for the specified pharmaceutical interventions and SHO or ISO. For example, 18.03% means that the cumulative infection rate for vaccinating after 5% of the population is infected, is 18.03% greater than that for the intervention of SHO; 31.92% means that the cumulative infection rate for vaccinating after 5% of the population is infected is 31.92% greater than that for the intervention of ISO. Thus, the larger the magnitude of a positive number, the greater the effectiveness of SHO or ISO compared to the specified pharmaceutical intervention.

**Table S10.** Differences in epidemic size between stay at home (SHO) interventions, social isolation (ISO) interventions and pharmaceutical interventions (VAX0, VAX1, VAX5), under various compliance rates. The compliance rate and efficacy for vaccination is 30% and 30%, respectively.

Supplemental Information

| Compliance | Vax5-SHO | Vax1-SHO | Vax0-SHO | VAX5-ISO | VAX1-ISO | VAX0-ISO |
|------------|----------|----------|----------|----------|----------|----------|
| 0.1        | 0.71%    | 0.29%    | 0.17%    | 4.92%    | 4.49%    | 4.38%    |
| 0.3        | 4.15%    | 2.39%    | 1.89%    | 31.92%   | 30.17%   | 29.66%   |
| 0.5        | 18.03%   | 13.51%   | 11.35%   | 25.96%   | 21.44%   | 19.28%   |
| 0.7        | 16.82%   | 9.75%    | 0.13%    | 16.82%   | 9.76%    | 0.13%    |
| 0.9        | 13.13%   | 4.01%    | 0.00%    | 13.13%   | 4.01%    | 0.00%    |

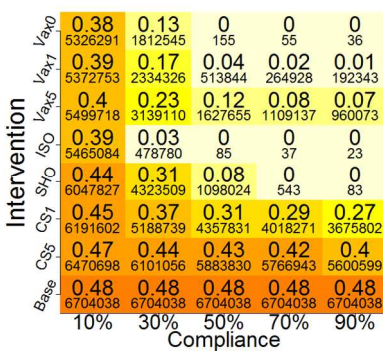

(a) Total Delhi

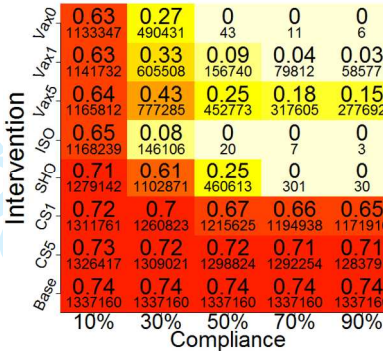

(b) Slum

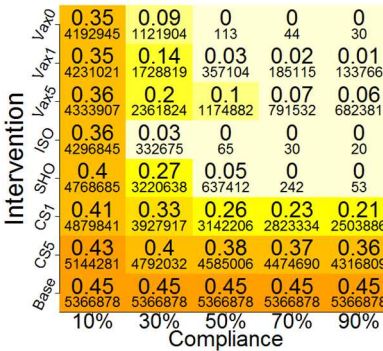

(c) Non-slum

**Figure S7.** Heat map of mean cumulative infection rates in Delhi, and slum and non-slum regions under different intervention strategies for Network 2. The vaccination efficacy is fixed at 70%. Five different compliance rates, i.e., 10%, 30%, 50%, 70% and 90% and 4 types of intervention strategies, i.e. vaccination (VAX), close-schools (CS), stay-home (SHO) and isolation (ISO), are considered. For vaccines, three different trigger points are considered: when cumulative infection rate reaches 0% (VAX0), 1% (VAX1) and 5% (VAX5). For close-schools, two trigger points are used i.e. when cumulative infection rate reaches 1% (CS1) and 5% (CS5). Compliant individuals are selected randomly from the entire Delhi population and the mean cumulative infection rates are calculated separately for the total population, and slum and non-slum subpopulations. Base is the baseline case with no interventions. The smaller-font numbers under the infection rate show the actual number of infected individuals. Darker colors correspond to higher infection rates.



## Supplemental Information

## References

1. Chen J, Chu S, Chungbaek Y, Khan M, Kuhlman C, Marathe A, Mortveit H, Vullikanti A and Xie D. Effect of Modeling Slum Populations on Influenza Spread in Delhi. *BMJ Open*, Vol. 6, Issue 9, 2016a.
2. Chen J, Chu S, Chungbaek Y, Khan M, Kuhlman C, Marathe A, Mortveit H, Vullikanti A, Xie D. Supplemental Information for Effect of Modelling Slum Populations on Influenza Spread in Delhi. *BMJ Open*, 2016b, Sep 1;6(9):e011699.  
Available at: <http://bmjopen.bmj.com/content/6/9/e011699/DC1/embed/inline-supplementary-material-1.pdf>
3. Yang Y, Sugimoto JD, Halloran ME, Basta NE, Chao DL, Matrajt L, Potter G, Kenah E, Longini IM. The transmissibility and control of pandemic influenza A (H1N1) virus. *Science* 2009 Oct 30;326(5953):729-733.
4. Jesan T, Menon G, Sinha S. Epidemiological dynamics of the 2009 influenza A(H1N1) v outbreak in India. *Current Science* (00113891) 2011; 100(7): 1051.

# BMJ Open

## Disparities in Spread and Control of Influenza in Slums of Delhi

|                                 |                                                                                                                                                                                                                                                                                                                                                                                                                                                                                                                                                                                                                                                                                                                                                                                                                                                                                                                                                                                                                                                                                                                                                                                                                                                                                 |
|---------------------------------|---------------------------------------------------------------------------------------------------------------------------------------------------------------------------------------------------------------------------------------------------------------------------------------------------------------------------------------------------------------------------------------------------------------------------------------------------------------------------------------------------------------------------------------------------------------------------------------------------------------------------------------------------------------------------------------------------------------------------------------------------------------------------------------------------------------------------------------------------------------------------------------------------------------------------------------------------------------------------------------------------------------------------------------------------------------------------------------------------------------------------------------------------------------------------------------------------------------------------------------------------------------------------------|
| Journal:                        | <i>BMJ Open</i>                                                                                                                                                                                                                                                                                                                                                                                                                                                                                                                                                                                                                                                                                                                                                                                                                                                                                                                                                                                                                                                                                                                                                                                                                                                                 |
| Manuscript ID                   | bmjopen-2017-017353.R1                                                                                                                                                                                                                                                                                                                                                                                                                                                                                                                                                                                                                                                                                                                                                                                                                                                                                                                                                                                                                                                                                                                                                                                                                                                          |
| Article Type:                   | Research                                                                                                                                                                                                                                                                                                                                                                                                                                                                                                                                                                                                                                                                                                                                                                                                                                                                                                                                                                                                                                                                                                                                                                                                                                                                        |
| Date Submitted by the Author:   | 11-Aug-2017                                                                                                                                                                                                                                                                                                                                                                                                                                                                                                                                                                                                                                                                                                                                                                                                                                                                                                                                                                                                                                                                                                                                                                                                                                                                     |
| Complete List of Authors:       | Adiga , Abhijin ; Network Dynamics and Simulation Sciences Laboratory, Biocomplexity Institute, Virginia Tech<br>Chu, Shuyu; Network Dynamics and Simulation Sciences Laboratory, Biocomplexity Institute, Virginia Tech<br>Eubank, Stephen; Network Dynamics and Simulation Sciences Laboratory, Biocomplexity Institute, Virginia Tech<br>Kuhlman, Christopher ; Network Dynamics and Simulation Sciences Laboratory, Biocomplexity Institute, Virginia Tech<br>Lewis, Bryan ; Network Dynamics and Simulation Sciences Laboratory, Biocomplexity Institute, Virginia Tech<br>Marathe, Achla; Network Dynamics and Simulation Sciences Laboratory, Biocomplexity Institute, Virginia Tech, ;<br>Marathe, Madhav ; Network Dynamics and Simulation Sciences Laboratory, Biocomplexity Institute, Virginia Tech<br>Nordberg, Eric ; Network Dynamics and Simulation Sciences Laboratory, Biocomplexity Institute, Virginia Tech<br>Swarup, Samarth; Network Dynamics and Simulation Sciences Laboratory, Biocomplexity Institute, Virginia Tech<br>Vullikanti, Anil; Network Dynamics and Simulation Sciences Laboratory, Biocomplexity Institute, Virginia Tech<br>Wilson, Mandy ; Network Dynamics and Simulation Sciences Laboratory, Biocomplexity Institute, Virginia Tech |
| <b>Primary Subject Heading</b>: | Global health                                                                                                                                                                                                                                                                                                                                                                                                                                                                                                                                                                                                                                                                                                                                                                                                                                                                                                                                                                                                                                                                                                                                                                                                                                                                   |
| Secondary Subject Heading:      | Epidemiology, Public health, Health informatics, Infectious diseases                                                                                                                                                                                                                                                                                                                                                                                                                                                                                                                                                                                                                                                                                                                                                                                                                                                                                                                                                                                                                                                                                                                                                                                                            |
| Keywords:                       | Delhi, epidemic, interventions, slum population, synthetic social contact network                                                                                                                                                                                                                                                                                                                                                                                                                                                                                                                                                                                                                                                                                                                                                                                                                                                                                                                                                                                                                                                                                                                                                                                               |
|                                 |                                                                                                                                                                                                                                                                                                                                                                                                                                                                                                                                                                                                                                                                                                                                                                                                                                                                                                                                                                                                                                                                                                                                                                                                                                                                                 |

SCHOLARONE™  
Manuscripts

1 Main manuscript  
2  
3  
4  
5

6 **Disparities in Spread and Control of Influenza in Slums of Delhi**  
7

8 A. Adiga, S. Chu, S. Eubank, C. J. Kuhlman, B. Lewis, A. Marathe, M. Marathe, E. K.  
9 Nordberg, S. Swarup, A. Vullikanti and M. L. Wilson  
10

11  
12  
13 Corresponding Author:  
14 Achla Marathe  
15

16 Network Dynamics and Simulation Sciences Laboratory  
17 Biocomplexity Institute  
18 Virginia Tech  
19 1015 Life Science Circle  
20 Blacksburg, VA 24061-0477, USA  
21 [amarathe@vt.edu](mailto:amarathe@vt.edu)  
22  
23

24 (F): 540-231-2891  
25 (P): 540-231-9210  
26  
27

28 Co-authors:  
29 Abhijin Adiga, Shuyu Chu, Stephen Eubank, Sandeep Gupta, Chris J  
30 Kuhlman, Bryan Lewis, Achla Marathe, Madhav Marathe, Eric K Nordberg, Samarth  
31 Swarup, Anil Vullikanti, Mandy L Wilson  
32  
33

34 Network Dynamics and Simulation Sciences Laboratory  
35 Biocomplexity Institute  
36 Virginia Tech  
37 1015 Life Science Circle  
38 Blacksburg, VA 24061-0477, USA  
39  
40

41 Keywords: Delhi; epidemic; interventions; slum population; synthetic social contact  
42 network.  
43  
44

45  
46 Word count: 7039  
47  
48  
49  
50  
51  
52  
53  
54  
55  
56  
57  
58  
59  
60

1 Main manuscript  
2  
3

## 4 **ABSTRACT**

5  
6 **Objectives** This research studies the role of slums in the spread and control of  
7 infectious diseases in the National Capital Territory of India, Delhi, using a detailed  
8 social contact network of its residents.

9  
10 **Methods** We use an agent-based model to study the spread of influenza in Delhi  
11 through person-to-person contact. Two different networks are used; one in which slum  
12 and non-slum regions are treated the same and the other in which 298 slum zones are  
13 identified. In the second network, slum-specific demographics and activities are  
14 assigned to the individuals whose homes reside inside these zones. The main effects of  
15 integrating slums is that the network has more home-related contacts due to larger  
16 family sizes and more outside contacts due to more daily activities outside home.  
17 Various vaccination and social distancing interventions are applied to control the spread  
18 of influenza.  
19

20  
21 **Results** Simulation based results show that when slum attributes are ignored, the  
22 effectiveness of vaccination can be overestimated by 30%-55%, in terms of reducing  
23 the peak number of infections and the size of the epidemic, and in delaying the time to  
24 peak infection. The slum population sustains greater infection rates under all  
25 intervention scenarios in the network that treats slums differently. Vaccination strategy  
26 performs better than social distancing strategies in slums.

27  
28 **Conclusions** Unique characteristics of slums play a significant role in the spread of  
29 infectious diseases. Modeling slums and estimating their impact on epidemics will help  
30 policy makers and regulators more accurately prioritize allocation of scarce medical  
31 resources and implement public health policies.

32  
33 **Policy Implications** Currently, over a billion people reside in slums across the world  
34 and this population is expected to double by 2030. This study uses influenza as an  
35 example to demonstrate the need to understand the role of slum populations in the  
36 spread and containment of infectious diseases.  
37

### 38 **Strengths and limitations of this study**

- 39  
40  
41  
42  
43  
44  
45  
46  
47  
48  
49  
50  
51  
52  
53  
54  
55  
56  
57  
58  
59  
60
- We show that the unique attributes of slums must be accounted for in understanding the spread and control of infectious diseases.
  - Intervention strategies have been applied one at a time but a combination of them could be used simultaneously to more aggressively control the epidemic.
  - This study does not consider age-specific susceptibility or immunity from past infections; all individual persons are assumed to be equally susceptible.
  - The disease transmission risk does not change across activity types, e.g. an hour with an infected person at home or at work carries the same risk.
  - Co-location based contact time is used as a proxy for physical proximity and short-distance environmentally-mediated transmission.

1 Main manuscript  
2

3 **INTRODUCTION**  
4

5 Infectious disease is one of the leading causes of human morbidity and mortality  
6 worldwide. Reports from Centers for Disease Control (CDC) show that over 200,000  
7 people in the United States (US) are hospitalized with influenza-like illness (ILI)  
8 symptoms each year, and the mortality on average is over 36,000 annually.[1-2] In  
9 Delhi, India, a joint study by CDC, All India Institute of Medical Sciences, and the  
10 National Institute of Virology has shown that ILI cases are present throughout the year,  
11 although they peak in rainy and winter seasons.[3] It carries a significant economic  
12 burden through reduced productivity and high costs of health care.[4-7] A CDC study  
13 finds that for outpatient and non-medically attended individuals, acute respiratory  
14 infections cost 1%-5% of monthly per capita income in India. In contrast, cost of  
15 inpatient care can be as high as 6%-34% of monthly per capita income.[8] For  
16 developed countries, the annual cost of influenza is estimated to be between \$1-\$6  
17 million per 100,000 people, according to the World Health Organization.[9]  
18  
19  
20  
21

22 In 2007, India established an Integrated Disease Surveillance Program (IDSP), which  
23 included a network of 12 regional laboratories, to minimize the threat of avian influenza  
24 and other highly infectious zoonotic diseases.[10] India faces some unique challenges  
25 in surveillance, prevention and control because of the seasonality of influenza at sub-  
26 regional levels. This seasonal variation depends upon latitude, monsoon season,  
27 humidity and climatic factors of the regions. Acute respiratory infections are estimated to  
28 be 43 million per year, of which 4-12% are due to influenza.[11-12] Chadha et al.[13]  
29 estimated hospitalizations due to respiratory illnesses to be 160 per 10,000 persons in  
30 year 2011, and children under age 5 had the highest incidence of them.  
31  
32  
33

34 Given that influenza is environmentally-mediated and spreads through close proximity,  
35 population density is an important factor in its spread. In India, the average population  
36 density is about 1000 people per square mile; in the slums, it can be 10 to 100 times  
37 higher.[14] Larger household size and crowding make it easier to transmit  
38 infections).[15-18] For example, Baker et al.[16] find that meningococcal disease risk  
39 among children doubles with the addition of 2 adolescents or adults (10 years or older)  
40 to a 6-room house. Other than overcrowding, slums are characterized by their lack of  
41 medical services,[19-20] which makes slum residents highly vulnerable to infectious  
42 diseases. Diseases like cholera, malaria, dengue and HIV are common in slums across  
43 the world.[21-23]  
44  
45  
46

47 This research uses Delhi, the National Capital Territory of India, where 13% of its 13.8  
48 million people live in slum areas, as an example city to study the spread and control of  
49 influenza. Delhi is an interesting case study. It ranks fourth in the world in urban  
50 population, and, among the top 25 largest urban areas, it ranks tenth in population  
51 density. Moreover, the results are likely to be generalizable to other slum areas within  
52 and outside of India.  
53  
54

55 This paper is an extension of the work done in Chen et al.[4], which shows that slum  
56 populations have a significant effect on influenza transmission in urban areas. Ignoring  
57  
58  
59  
60

1 Main manuscript

2  
3 the influence of slum characteristics underestimates the speed of an outbreak and its  
4 extent. However, Chen et al.[4] do not consider any interventions on the epidemic  
5 spread. *The focus of this research is to study the effect of different intervention*  
6 *strategies on several subpopulations (slum, age and gender) in two different Delhi*  
7 *networks, i.e., original (referred to as Network 1) and refined (Network 2).*  
8  
9

10 The original network used in Xia et al.[24] studied the spread and control of influenza in  
11 Delhi using Network 1, which did not take into account the special attributes of the slum  
12 population, such as larger family sizes and different types of daily activity schedules.  
13 Chen et al.[4] used Network 2, the refined social network of Delhi, which accounted for  
14 slum demographics and slum activities, but did not study intervention strategies. In  
15 Network 2, there are 298 slum regions in Delhi, containing about 1.8 million people.  
16  
17

18 The goals of this work focus on understanding the effects of pharmaceutical and non-  
19 pharmaceutical interventions on epidemic outcomes. Pharmaceutical interventions (PI)  
20 include vaccinations, and non-pharmaceutical interventions (NPI) are social distancing  
21 measures such as school closure, quarantine and staying home. These effects are  
22 studied comparatively: (i) in Network 1 versus Network 2, overall and for subpopulations  
23 in each; and (ii) in the slum and non-slum regions of Network 2. Additionally, in a  
24 scenario where interventions can be applied to a limited number of individuals, we  
25 explore how resources should be split between slum and non-slum subpopulations in  
26 order to achieve the best outcomes with respect to total infection rate (i.e., the  
27 cumulative fraction of a population infected).  
28  
29  
30

## 31 METHODS

32 We use an agent-based modeling (ABM) approach to simulate the spread and  
33 containment of influenza in social contact networks of Delhi, India. We compare two  
34 networks: one considers slum-specific attributes, and the other does not. In this  
35 section, we describe the networks, the disease model for each agent, the interventions,  
36 and the heterogeneities of the problem that make ABM uniquely suited to study  
37 epidemics. Throughout this manuscript, each agent in the ABM is an individual human.  
38  
39  
40  
41

42 **Social Contact Networks:** This study uses two synthetic social networks of Delhi,  
43 created in Xia et al.[24] and in Chen et al.[4]. Details on their construction can be found  
44 in Xia et al.[24], Chen et al.[4], Barrett et al.[25], Bisset et al.[26] and references therein.  
45 The synthetic social network by Xia et al.[24] is called *Network 1*, and the more refined  
46 network developed in Chen et al.[4], *Network 2*.  
47  
48

49 Network 1 was developed in part from Land Scan and Census data for Delhi, a daily set  
50 of activities of individuals, and the locations of those activities including geo-locations of  
51 residential areas, shopping centers, and schools, collected through surveys by  
52 MapMyIndia.com. By assigning activity locations to individuals' activities, people are  
53 located at particular times at particular geographic coordinates (including office  
54 buildings, schools, etc.) and within particular rooms of buildings. Next, contacts between  
55 individuals are estimated when each person is deemed to have made contact with a  
56  
57  
58  
59  
60

1 Main manuscript

2  
3 subset of other people simultaneously present at the same location. This gives rise to a  
4 synthetic social contact network where network edges represent these contacts.  
5

6  
7 Network 2 models the slum regions in Delhi and assigns slum-specific attributes to the  
8 individuals whose homes reside in the slum polygons. Slum residents' attributes and  
9 their daily sets of activities are collected through a ground survey in Delhi slums, by a  
10 vendor, Indiamart ([www.Indiamart.com/trips](http://www.Indiamart.com/trips)). The slum polygons are obtained from  
11 *MapMechanic.com*. Individuals living in the slum regions are a part of the slum  
12 population. All other individuals are part of the non-slum population. Network 2 is a geo-  
13 located, and contextualized social contact network of Delhi with slums integrated in it.  
14  
15

16  
17 Following are the main differences between the original network (Network 1) and the  
18 refined network (Network 2). The original social contact network treats the slum regions  
19 like any other region in Delhi in terms of assignment of demographics and individual  
20 activities, i.e. no special consideration is given to slum residents. The refined Network 2  
21 identifies 298 slum polygons (zones) in Delhi and assigns slum-specific demographics  
22 and activities to the individuals whose homes reside inside these polygons. Thus, the  
23 number of individuals is the same in both populations. The slum population constitutes  
24 about 13% (1.8 million) of the entire Delhi population of 13.8 million people. The main  
25 effects of integrating slums is that Network 2 has more home-related contacts due to  
26 larger family sizes and more outside contacts due to more daily activities outside home.  
27 Also, those individuals who reside outside of slum zones have the same activities in  
28 both networks. Overall, there are over 231 million daily interactions between pairs of  
29 individuals. Table S1 compares those two networks as well as data sources for slum  
30 and non-slum Delhi, India. (Table and figure numbers that are prefixed with 'S' are in  
31 the supplementary information (SI)). For example, the average degree increases from  
32 30.4 to 33.4 from Network 1 to Network 2, and the maximum degree increases from 170  
33 to 180. We refer to Chen et al.[4] for more detailed information about the two networks.  
34 Several plots of properties and structural characteristics of Networks 1 and 2 are given  
35 in Chen et al.[27].  
36  
37  
38  
39

40 **Disease Model:** An SEIR, Susceptible (S), Exposed (E), Infectious (I) and Removed or  
41 Recovered (R) model is considered within each individual. Each node in the network  
42 represents an individual, and each edge represents a contact on which the disease can  
43 spread. A contact represents possible transmission between two people that are co-  
44 located for some duration (based on their activity schedules). This is an approximation  
45 to model direct contact and short-distance environmentally-mediated transmission that  
46 might include direct physical contact, fomite mediated, and airborne transmission.[28]  
47  
48

49 We start each epidemic simulation with 20 index cases, randomly chosen. (We find that  
50 results are not sensitive to the number of initial infections.) The detailed description of  
51 the SEIR model as well as the choices of transmissibility value,  $R_0$ , the explicit  
52 incubation and exposed periods can be found in the supplementary information. This  
53 disease model has been used in other works such as Liao et al.[29], Marathe et al.[30].  
54  
55  
56  
57  
58  
59  
60

1 Main manuscript  
2  
3

4 The transmissibility value for disease transmission is that for the strong influenza model  
5 in Chen et al.[4]. That work used mild, strong, and catastrophic influenza models, so we  
6 chose the intermediate transmissibility. This corresponds to base attack rates (i.e.,  
7 cumulative infection fractions) of 0.42 and 0.48, respectively, in Networks 1 and 2.  
8 These rates are generally higher than those in some other studies that either compute  
9 experimental attack rates from cases or compute them in modeling studies such as this  
10 one. Attack rates used by past researchers for different strains of influenza include Asia  
11 [0.22 to 0.50],[31] Southeast Asia [0.11 to 0.31 in children [32]; 0.05 to 0.65 [33]], and  
12 India [0.111 to 0.235 [34]; 0.074 to 0.424 [35]; 0.045 to 0.294 [36]; 0.008 to 0.100 [37];  
13 0.209 for various strains [13]]. The results of Chen et al.[4] indicate that the results here,  
14 for this particular transmissibility, will be qualitatively the same for other  
15 transmissibilities, but will scale down or up as transmissibility changes in the same  
16 direction.  
17  
18

19  
20 **Interventions:** This work considers three vaccination scenarios, i.e., vaccinate when  
21 cumulative infection rate is 0% (VAX0, i.e. vaccinate on day 1), 1% (VAX1), and 5%  
22 (VAX5). Three classes of social distancing strategies are considered: (i) stay-home  
23 (SHO) if infected, i.e. eliminate all non-home related contacts but continue to maintain  
24 contacts within the household; (ii) close-schools when cumulative infection rate has  
25 reached 1% (CS1) and when it has reached 5% (CS5), i.e. eliminate school related  
26 contacts; and (iii) (ISO), in which all contacts, including home contacts, of a person are  
27 eliminated when a person becomes infectious. For vaccination, five different compliance  
28 rates (10%, 30%, 50%, 70%, 90%) and two different vaccine efficacies (30% and 70%)  
29 are considered.  
30  
31

32  
33 VAX0, SHO, ISO are all fairly aggressive interventions because they are implemented  
34 either before a person gets infected or immediately upon becoming infectious. These  
35 are actions taken at the individual or family level. For example, vaccination before the  
36 influenza season or isolating a sick child at home are family decisions. Even CS1 is an  
37 aggressive intervention in the sense that this action is taken by government officials  
38 based on aggregate school sickness levels—closing schools before any outbreaks is  
39 typically not done. From these starting points, vaccinations when 1% or 5% of the  
40 population is infected (VAX1, VAX5), and closing schools when 5% of the population is  
41 infected are less aggressive treatments (CS5). The five levels of compliance are also  
42 variations on aggressiveness in treatments.  
43  
44

45  
46 These conditions and parameters are consistent with results from other studies and  
47 guidelines put out by international organizations. A meta-study of immunization and  
48 slums [38] identifies several vaccination-related studies of slums in India. Unfortunately,  
49 these studies are for other diseases such as Hepatitis B, measles, mumps, malaria, and  
50 typhoid fever. Nonetheless, slum vaccination rates for children over these ailments  
51 range from 25% to 69% for full immunity and from 15% to 55% for partial immunity.  
52 Vaccination effectiveness for influenza-like illness (ILI) in India was determined to be  
53 about 33% to 36%.[39] In 2012-2013, of 1000 pregnant women in Srinagar India, none  
54 were vaccinated against influenza.[40] With regard to school closures, the World Health  
55 Organization (WHO) states that school closures may be undertaken proactively (before  
56  
57  
58  
59  
60



1 Main manuscript

2  
3 an outbreak) or reactively (after influenza starts to spread).[41] WHO recommends that  
4 school closure occur before 1% of the population becomes infected. It also  
5 recommends that people (students and staff) stay home when they feel ill. In another  
6 meta-study[42], it was found that school closure, effected when 0.1% of the population  
7 was infected, was twice as effective in reducing the total attack rate as school closure  
8 occurring after 1% of the population was infected. Moreover, the percentage of people  
9 infected before school closure was triggered varied between 0.02% to 10% across  
10 several studies.  
11  
12

13  
14 When a susceptible node is vaccinated, its probability of getting infected by an  
15 infectious node is scaled down by the efficacy. If it becomes infectious, its probability of  
16 infecting susceptible nodes is also scaled down by the efficacy. In other words, both  
17 incoming and outgoing infection probabilities of vaccinated individuals are reduced by  
18 the vaccine efficacy. Interventions are applied to slum residents, non-slum residents,  
19 and the entire region of Delhi.  
20  
21

22 For each experiment, 25 replicates are simulated for 400 days, and their mean results  
23 are reported. The averages are time-point wise averages, e.g. the mean infection rate at  
24 day 100 is calculated by taking the average of the 25 infection rates that occur on day  
25 100 of each replicate. Table S2 summarizes all the interventions considered, and Table  
26 S3 contains all variables in simulations, including intervention parameters.  
27  
28

29 **Heterogeneities captured:** There are several heterogeneous aspects to this problem  
30 that motivate the use of an ABM approach: (i) the 298 slum zones have populations that  
31 vary by more than four orders of magnitude in size; (ii) the geographic extent of slum  
32 zones differ; (iii) the slum zones are located at irregular spatial intervals throughout  
33 Delhi; (iv) the activity patterns of people living in slums are different from those in the  
34 non-slum region; and (v) each individual interacts with specific others based on co-  
35 location.  
36  
37

38 The implications of these heterogeneities include the following. First, the particular  
39 synthetic households that live within slums are predicated on the number of slum zones,  
40 their locations, and their spatial geometries. These homes have larger family size and  
41 hence more home contacts. Second, slum individuals have different activity patterns  
42 which change the co-located contacts of each slum person: that is, with whom they  
43 interact and for how long. For example, see the supplemental information of Chen et  
44 al.[27]. The average total contact durations by activity type and by slum/non-slum  
45 residents are provided, which show that non-slum people have greater contact  
46 durations for work, school, and college activities, but less for home and other types.  
47 Overall, a slum person has about 50% greater total contact duration per day compared  
48 to a non-slum person. The same supplemental shows that in the age range 20 to 60  
49 years (by year), females that live in slums have more contacts per day than their male  
50 counterparts. However, females whose homes are outside of slum regions have  
51 average number of daily contacts that are below their male counterparts.  
52  
53  
54  
55  
56  
57  
58  
59  
60

1 Main manuscript  
2  
3

## 4 **RESULTS AND ANALYSIS**

5 Our results are grouped as follows. (1) Comparison of Network 1 and Network 2 for  
6 base case and intervention cases. (2) Results for both networks based on demographic  
7 classes, such as slum/non-slum, gender, and age groups, for a wider range of  
8 intervention strategies. (3) Comparison of Network 1 with the non-slum population of  
9 Network 2. (4) Effects of pharmaceutical and non-pharmaceutical interventions for a  
10 wide range of parameter values. (5) Effects of different resource allocation strategies.  
11

12 All differences are tested with the two-sample t-test and they are all statistically  
13 significant with p-values smaller than  $2.2e-16$ . The 95% confidence intervals are given  
14 for each comparison. Here is a brief summary of selected results with examples of  
15 mechanisms, to provide a high-level overview. Details of results follow this summary  
16 and these details matter because there are many factors (inputs) in a simulation whose  
17 interactions change results.  
18  
19

20  
21 (1) Ignoring the unique attributes of slums in a population overestimates the benefits of  
22 the interventions. For example, in the case of vaccination intervention (efficacy 30% and  
23 compliance 30%), the values for the epidemic size (i.e., cumulative percentage of  
24 infected), peak infection rate (i.e., maximum percentage of a population infected on any  
25 day), and time to peak are 33.1%, 3.0%, and 184 days, respectively, in Network 2,  
26 whereas they are 23.3%, 1.34%, and 286 days in Network 1. In relative terms, the  
27 epidemic size and peak infection rate are underestimated by 42.2% and 123.2%  
28 respectively, while the time to peak is overestimated by 35.7% in Network 1 (see  
29 Figures 1, 2 and Table S4). The larger family sizes for slum families in Network 2 and  
30 the increased number of edges result in larger outbreaks and faster time to peak  
31 infections.  
32  
33

34  
35 (2) Interventions are more effective in Network 1 than Network 2 for all types of  
36 interventions: vaccination, closing schools, staying home, and isolation. These trends  
37 also hold over wide ranges of efficacy and compliance (see Figures 3, 4, S1, S2 and  
38 S3). Hence, not accounting for slums gives overly optimistic results for the effectiveness  
39 of the interventions. The reduced average family size in Network 1 means fewer within-  
40 home edges, which slows infection and reduces spreading. Closing schools and staying  
41 home interventions do not affect home edges. However, the magnitude of this effect  
42 varies with intervention conditions (e.g., compliance rate, time at which intervention is  
43 applied).  
44  
45

46  
47 (3) Cumulative infection rates by subpopulation in Network 2 show that slums sustain  
48 greater infection rates than non-slums under all intervention scenarios, sometimes by as  
49 much as 44.0%. See Figure 4 and Table S5 for more details. This is due to the greater  
50 household sizes in slums.  
51

52  
53 (4) For Network 2, under a wide range of intervention compliance rates (10% to 90%),  
54 the isolation strategy is up to 32% more effective in containing an outbreak than  
55 vaccination (for 30% efficacy). Staying home is up to 18% more effective than  
56 vaccination at 50% compliance. See Figure 3 and Table S6 for more details. Isolation,  
57  
58  
59  
60

1 Main manuscript

2  
3 although hard to implement from practical considerations, is most effective because  
4 edges to susceptible individuals are removed (isolation also provides a good  
5 comparative case). Differences between staying home and vaccination depend on  
6 compliance rates.  
7

8  
9 (5) For Network 2, delay in triggering interventions has 7.3% to 44.0% more adverse  
10 effect in slums than in non-slum regions across compliance rates from 10% to 90%. See  
11 Figure 4 and Table S7 for more details. Early interventions mean actions are taken  
12 when outbreaks are smaller and are therefore more readily contained.  
13

14  
15 (6) Comparison of Network 1 (Figure 3a) with the non-slum population (Figure 4b) of  
16 Network 2 shows that just the presence of slum specific activities and interactions with  
17 non-slum population makes social-distancing based interventions less effective in the  
18 non-slum regions of Network 2.  
19

20  
21 (7) A full-factorial design that splits resources between slum and non-slum regions  
22 indicates that the most effective intervention is to give vaccines to slums and apply  
23 social distancing to non-slums. Applying vaccine and social distancing to slum regions  
24 is the next most effective intervention. See Figure 5. By applying social distancing to  
25 non-slums, these individuals are kept isolated from slum individuals that are infected.  
26 The greatest benefits accrue to the slum populations.  
27  
28

### 29 30 31 **Comparison between Networks 1 and 2: Base case versus interventions**

32  
33 We start with a comparative analysis of the influenza epidemic, with and without  
34 interventions, on Network 1 and Network 2 to measure the impact of integrating slums  
35 in the population on epidemic measures. Figure 1 shows the average simulation time  
36 histories for the base case, and when vaccination is applied randomly to 30% of the  
37 population in each network with vaccine efficacy set at 30%. Mean infection rate is the  
38 daily fraction of infected individuals. It is the time-point wise average over 25  
39 simulations. For example, the mean infection rate at day 100 is calculated by taking the  
40 average of all 25 infection rates. Simulations for other vaccine efficacies and  
41 compliance rates give qualitatively similar results. Two sets of those results are shown  
42 in the supplemental information, see Figures S1 and S2. Note that Network 1 does not  
43 distinguish between slum and non-slum individuals, so the epidemic curve is not split by  
44 subpopulation.  
45  
46

47  
48 Results in Network 2 differ significantly from results in Network 1 for both the base case  
49 and intervention case. In Network 2, the epidemic starts earlier, peaks earlier, has a  
50 larger epidemic size and has higher peaks compared to the corresponding epidemic  
51 quantities in Network 1. Thus, if policy planners ignore slums and use Network 1 to  
52 plan, there will be a false sense of security and lack of urgency to implement  
53 interventions. For both the base case and the intervention case, ignoring unique  
54 characteristics of the slums will result in an underestimation of the infections and the  
55 speed of spread.  
56  
57  
58  
59  
60

1 Main manuscript  
2  
3  
4  
5  
6  
7  
8  
9  
10  
11  
12  
13  
14  
15  
16  
17  
18  
19  
20  
21  
22  
23  
24  
25  
26  
27  
28  
29

Figure 1 goes here

For the intervention cases, the time to peak infection decreases by 35.7%, i.e. from 286 days for Network 1 to 184 days for Network 2, meaning an influenza epidemic would peak roughly 100 days earlier than one would expect based on the results from Network 1. For the base case, time to peak infection drops by 20.8%, i.e. 34 days reduction for Network 2 as compared to Network 1.

Percentage changes and differences must be viewed cautiously, and to illustrate this point, we present data for the key parameters in Tables S4 and S8. The difference in the peak infection rate (i.e., the maximum fraction of daily infected individuals during the simulation) between Networks 1 and 2 for the base case is 2.2%, or 47.6% in percentage change (see Table S8). For the intervention case shown in Table S4, the difference between the two networks is less (1.7%), but the percentage change is more (123.2%) because the magnitudes of the peak infection rates are reduced when effective interventions are used. We make note of this here and mainly use the percentage change values in discussing results. For more detailed comparison between vaccination intervention and the base case in Network 1 and Network 2, we refer to Tables S7 and S9 and Figures S4 and S5.

### 30 **Comparison between Networks 1 and 2 based on individual demographic** 31 **information**

32 We divide the Delhi population into strata by age, gender, and geographic home  
33 location (i.e., slum and non-slum), and analyze mean cumulative infection rates by  
34 subpopulation for the two networks. In simulations, individuals are chosen at random in  
35 the entire network for vaccination. Various vaccination scenarios are investigated.  
36  
37  
38

39 Figure 2 displays the cumulative infection rate results. On the x-axis, 'Total' refers to the  
40 entire population of Delhi. There are three breakdowns of the entire population. 'Slum'  
41 and 'Non-slum' refer to slum and non-slum regions, respectively. 'Male' and 'Female'  
42 denote the total number of males and females in Delhi, respectively. Four age groups  
43 are considered: 'Preschool' (0-4), 'School' (5-18), 'Adult' (19-64), and 'Senior' (65+). The  
44 black lines correspond to the mean cumulative infection rates for the base case. Other  
45 curves indicate vaccination strategies under different levels of vaccination rate ( $v$ ) and  
46 vaccine efficacy ( $\alpha$ ). Two vaccination rates (30%, 50%) and two vaccine efficacy rates  
47 (30%, 70%) are shown in the figure.  
48  
49  
50

51 For Network 1, vaccination rate of 50% or higher stops the epidemic for all categories of  
52 individuals, regardless of vaccine efficacy. An efficacy of 70% also contains the  
53 epidemic, given a vaccination rate of at least 30%. In comparison, for Network 2, either  
54 a vaccination rate of 70% is required (not shown in plot for clarity) or a vaccination rate  
55 of 50% combined with a vaccine efficacy of 70% is required to stop the epidemic for all  
56 categories of individuals.  
57  
58  
59  
60

1 Main manuscript  
2  
3  
4

5 In Network 1, slum and non-slums are treated the same so the infection rates are  
6 identical in Figure 2. However, all scenarios in Network 2 show a higher burden of  
7 disease on the slum population. This is due to the fact that slum households have larger  
8 family size and more contacts on average than households in non-slum areas, see  
9 Chen et al.[27] As shown later, we find similar patterns of infection in slum and non-  
10 slum subpopulations for other interventions such as 'close-schools' and 'stay-home'.  
11

12 The results in both Figure 1 and Figure 2 indicate that ignoring the effect of slums  
13 results in overestimation of the benefits of interventions in terms of reduction in the  
14 mean cumulative infection rate and peak infection rate, as well as the time to peak. This  
15 optimism holds for slum, non-slum and total population under various levels of  
16 vaccination rates and efficacy rates in Network 2. See Table S10 for more detailed  
17 comparison of results between slum and non-slum in Network 2.  
18  
19

20  
21 Figure 2 goes here  
22  
23

## 24 **Comparison between Networks 1 and 2 across a wide range of intervention** 25 **strategies** 26

27 Next, we consider a variety of intervention strategies for comparative analysis. We  
28 consider vaccination, school closure, stay home, and isolation strategies. For vaccines,  
29 three different trigger points are considered: when cumulative infection rate reaches 0%  
30 (VAX0), 1% (VAX1) and 5% (VAX5). For close-schools, two trigger points are used:  
31 when the cumulative infection rate reaches 1% (CS1), and 5% (CS5). Under the stay at  
32 home (SHO) strategy, all non-home activities and interactions are eliminated but all  
33 contacts within the household are maintained. Under isolation (ISO) an individual has  
34 no contact with other individuals (even home interactions are eliminated). The stay-at-  
35 home and isolation interventions are implemented for compliant infectious individuals,  
36 after they become infectious, for the entire infectious duration.  
37  
38  
39

40 Figure 3 displays average cumulative infection rates in Network 1 and Network 2 for a  
41 wide range of intervention strategies. For each strategy, five different compliance rates  
42 are considered, i.e., 10%, 30%, 50%, 70% and 90%. The cumulative infection rates  
43 (i.e., fractions) are displayed as larger numbers in boxes, while smaller-font numbers  
44 are the actual number of infected individuals. Darker colors correspond to higher  
45 infection rates. Note that compliance rate is simply the vaccination rate for strategies  
46 VAX0, VAX1 and VAX5. Compliant individuals are selected at random from the entire  
47 population. The 'Base' values do not vary with compliance because the base case has  
48 no intervention. Note that all heat maps in this paper use the same color scheme so that  
49 colors can be compared across figures.  
50  
51  
52

53 Since Network 1 does not distinguish between slum and non-slum populations, we only  
54 compare the two networks for the whole of Delhi. The general pattern is similar for both  
55 networks. However, all interventions have a larger effect on Network 1 under the same  
56 compliance rate (that is, corresponding numbers are uniformly lower for Network 1 than  
57  
58  
59  
60

1 Main manuscript  
2

3 for Network 2). The infection rates drop to zero at a smaller compliance rate for VAX0,  
4 stay-home, and isolation strategies in Network 1 as compared to those for Network 2.  
5  
6

7 Figure 3 goes here  
8  
9

10 At a high level, among all intervention strategies, early vaccination (VAX0 and VAX1),  
11 social isolation (ISO), and stay home (SHO) are more effective than the other  
12 strategies, and this is more readily observed at higher compliance rates. For these  
13 more effective strategies, the interventions per person are implemented right after (or  
14 very shortly after) the person is infected. For example, SHO is implemented  
15 immediately after a person becomes infectious. Thus, a person that becomes infectious  
16 can infect their family members, but if these other members become infectious, then  
17 they, too, will be confined to home. Thus, home-bound people can infect their family  
18 members, but no one beyond their family (for 100% compliance). As compliance rate  
19 increases, this effect approaches, roughly, a “family-based” isolation intervention  
20 (similar to ISO), consistent with the results in Figure 3 and in subsequent results.  
21  
22  
23  
24  
25

### 26 **Effect of vaccination versus social distancing on slum and non-slum** 27 **subpopulations** 28

29  
30 We now compare the impact of vaccination and social distancing on slum and non-slum  
31 subpopulations from Network 2. Social distancing interventions are close-schools, stay-  
32 home, and isolation.  
33

34  
35 The mean cumulative infection rates (and actual numbers of infections underneath) for  
36 each compliance level are shown in the heat maps in Figure 4 for slum and non-slum  
37 populations in Network 2. The axis labels are identical to those in Figure 3, as is the  
38 color scheme of the cells. The base case values are constant since there is no  
39 intervention and hence no compliance. Darker colors correspond to higher infection  
40 rates.  
41

42  
43 Compared to the base case, all interventions reduce infection rates to some extent. As  
44 the compliance rate increases, infection rates drop for all interventions. Infection rates  
45 drop to zero in slum and non-slum regions at a compliance level of 70% or higher,  
46 under SHO, ISO, and VAX0 strategies. Early interventions or lower trigger levels reduce  
47 the infection rates significantly, and this effect increases with compliance rate.  
48

49  
50 The following observations can be made from Figure 4. Social distancing, i.e. SHO, at  
51 low and intermediate compliance and CS at all compliance levels, are less effective in  
52 slum regions as compared to non-slum regions. This is because CS only eliminates  
53 school interactions for those attending school, and there are fewer school edges in  
54 slums compared to non-slum areas, as shown in Figure S6. The effectiveness of CS in  
55 slums is mitigated by the greater average number and duration of interactions at home  
56 in slums as compared to non-slums (see Figure S6 and Chen et al.[27]). Thus, if a  
57  
58  
59  
60

1 Main manuscript

2  
3 person is sick, there is a greater chance of transmitting contagion to family members,  
4 who then may have activities outside of school, thus circumventing the CS intervention.  
5 At high compliance, SHO is effective because all interactions outside home (including  
6 school) are eliminated.[27]  
7  
8

9 These observations are also supported by Figure S7, which contains numbers of edges  
10 used to transmit contagion for a base-case run of Figure 1. There are several effects  
11 that bear on the above observations. First, in the cases of activities “work”, “other”, and  
12 “school”, the number of edges transmitting contagion from slums to non-slums is greater  
13 than the reverse: from non-slum to slum. Second, in two of these three activity  
14 categories, there is more slum to non-slum transmissions than slum to slum  
15 transmissions. Edges of transmission for slum dwellers is dominated by home  
16 interactions. The infected homes in slums serve as launching points to drive disease to  
17 non-slums through slum to non-slum interactions. (There are no “mixed” edges at  
18 homes, and shopping and college activities have low levels of slum activity because of  
19 socio-economic factors.) We will see the effects of these mechanisms in Figure 5, but  
20 we now return to Figure 4.  
21  
22  
23

24 Isolation works well at 30% or higher compliance rates, but it is a much harder strategy  
25 to implement, especially in slums. However, it is considered here for comparative  
26 analysis. Vaccination also produces marked decreases in cumulative outbreak sizes as  
27 compliance increases. However, close-school is generally less effective because this  
28 intervention removes only a fraction of interactions for a fraction of the population, i.e.  
29 school aged children. Simulations were also run for 70% vaccine efficacy. Since results  
30 are qualitatively similar for those parameters, these plots are provided in Figure S3.  
31  
32  
33

34 Figure 4 goes here  
35  
36

### 37 **Comparison between Network 1 and non-slum areas of Network 2**

38 Note that Network 1 treats all parts of the region as non-slum, i.e. all individuals follow  
39 non-slum activities and demographics. In order to capture the additional disease risk to  
40 the non-slum population that arises from the interactions with the slum population, we  
41 compare Network 1 in Figure 3a with the non-slum population of Network 2 in Figure 4b.  
42 In base case, the additional disease risk to the non-slum population goes up from 42%  
43 to 45%. However, the beneficial effects of social distancing strategies drop by a large  
44 amount, e.g. close school strategies are 5-20% less effective in the non-slum areas of  
45 Network 2. This effect changes non-linearly with the compliance rate. As compliance  
46 rate goes up, the difference between performance of Network 1 and non-slum parts of  
47 Network 2 goes up in CS1 and CS5. This implies that in Network 2, non-slum population  
48 requires much higher levels of compliance to achieve the same results as in Network 1.  
49 This difference is less stark for vaccination based interventions, i.e. VAX0, VAX1 and  
50 VAX5. This is expected since the effect of vaccination is less dependent on interactions;  
51 it is only through herd immunity that interactions come into play.  
52  
53  
54  
55  
56

### 57 **Constrained resource allocation among slum and non-slum areas**

1 Main manuscript  
2  
3  
4

5 We consider a specific scenario under Network 2. If only a limited number of vaccines  
6 are available, and only a certain fraction of individuals can be kept home during an  
7 epidemic, how should these interventions be applied to the slum and non-slum regions  
8 so that the epidemic can be controlled effectively? Given that slum residents' attributes  
9 differ from those of non-slum residents, is there a strategy that works better in slums  
10 than in non-slum areas? The total population in Delhi is about 13.8 million, which  
11 includes about 1.8 million slum residents. We assume that only 10% of the total  
12 population can be covered by interventions, half through vaccination and the other half  
13 through stay home. Enough vaccines are available to cover 5% of the total population  
14 (i.e. 692,183 vaccinated, corresponding to about 38.25% of slum or 5.75% of non-slum  
15 population), and 5% of the individuals can stay home (692,183 individuals; this is  
16 applied to only the infected individuals). Note that an individual may receive a vaccine  
17 and also stay at home if this individual, in spite of being vaccinated, gets infected.  
18  
19

20  
21 We consider 4 different ways of applying interventions to 10% of the total population: (i)  
22 apply both interventions to slums, i.e. give all vaccines to slums and apply SHO only in  
23 the slums (VsSs); (ii) apply all interventions to non-slum areas (VnSn); (iii) give vaccines  
24 to slums and SHO to non-slums (VsSn) and (iv) give vaccines to non-slums and apply  
25 SHO to slums (VnSs).  
26  
27

28 For both types of intervention, the same number of individuals is chosen randomly from  
29 slum or non-slum areas. 10% of the total Delhi population amounts to 76.5% of slum  
30 population, 11.5% of the non-slum population, or a combination of 38.25% of the slum  
31 and 5.75% of the non-slum population (i.e. half from slums and half from non-slums).  
32 Figure 5 shows the mean cumulative infection rates, as well as the number of infected  
33 from the entire population of Delhi, the slums, and non-slum areas under each of the  
34 four scenarios. The first 3 columns refer to Network 2 and the last column shows results  
35 for Network 1. Since Network 1 does not distinguish between slum and non-slum areas,  
36 the infection rates in each subpopulation remain the same as for the total population.  
37  
38

39 Comparison of the last two columns in Figure 5 indicates that the non-slum population  
40 in Network 2 faces 3-5% additional disease risk compared to Network 1 in all cases.  
41 This is primarily driven by the increased interactions within slum populations and  
42 between slum and non-slum populations in Network 2.  
43  
44

45 In Figure 5, all four intervention strategies produce essentially the same total attack  
46 rates (around 43% to 44%), a drop of 4% to 5% over the base case. The dominant  
47 effect on Network 2, is the benefits that primarily accrue to the slum population for the  
48 VsSs and VsSn strategies because they drive down the fraction of infected slum  
49 residents from 0.74 to 0.55 or 0.58. Also, as described in the context of Figures 4 and  
50 S6 above, social distancing of the non-slum residents helps to isolate them from the  
51 infected slum residents. Results such as these may be helpful to policy makers in  
52 breaking the poverty trap in economically poor regions.[43]  
53  
54  
55  
56  
57  
58  
59  
60



1 Main manuscript  
2

3 Also, the strategy of vaccinating non-slums and social distancing slums (VnSs) is not as  
4 effective as the interventions in rows 1 and 2 of Figure 5. This is a counterintuitive  
5 result, since the density of population is much higher in the slums, which may lead to  
6 the belief that social distancing in slums will break up the dense clusters. However, a  
7 careful examination shows that keeping slum residents home is not an effective social  
8 distancing strategy because their family size is, on average, almost 3 times the family  
9 size of non-slum households.[27] The high level of mixing at home makes social  
10 distancing ineffective in slums unless the infected individual is completely isolated.  
11 However, complete isolation is not viable in slum areas where the entire household may  
12 live in a single room.  
13  
14  
15  
16  
17  
18

19 Figure 5 goes here  
20

## 21 DISCUSSION 22

23  
24 With slum populations expected to grow to 2 billion by 2030,[44] it is becoming  
25 increasingly urgent to understand how to control the spread of infectious diseases in  
26 slum areas and measure its effect on urban populations. To our knowledge, a detailed  
27 study of interventions to control influenza epidemics in slums, using an agent-based  
28 simulation model, has never been done before. Slum conditions are important for a city  
29 beyond the direct effects of disease transmission. For example, civil wars may be  
30 precipitated or exacerbated by disease outbreaks because they decrease social health  
31 and welfare.[45]  
32  
33

34  
35 Even though slum regions contain only 13% of the total population of Delhi, Chen et  
36 al.[4] show that omitting their attributes leads to underestimation of the overall infection  
37 rate and the peak infection rate of the epidemic. This paper extends that work by  
38 evaluating the differential impact of interventions on slum and non-slum regions.  
39 Various vaccination and social distancing strategies are analyzed under different  
40 scenarios that show that the slum population is more prone to infections under the same  
41 control measures. Furthermore, taking account of slum populations significantly alters  
42 the disease dynamics in the *entire* population. Differences in key measures are  
43 demonstrated between the cases of accounting for slum populations and not: e.g., a  
44 100% increase in the peak attack rate in some cases when slum regions' characteristics  
45 are taken into account, compared to the case when they are ignored.  
46  
47  
48

49 Figure 4, which compares infections in slum with non-slum areas, shows that at very  
50 high compliance rates, some interventions can be equally effective in both slums and  
51 non-slums. However, such high compliance rates are typically not feasible due to  
52 practical realities on the ground, and also because they require timely diagnosis of  
53 infected cases. For SHO to be effective, the coverage rate needs to be 70% or more in  
54 both slums and non-slums, and the diagnosis of the infected individuals needs to be  
55 correct and immediate. In other words, effective control of a contagious epidemic in a  
56  
57  
58  
59  
60

1 Main manuscript  
2  
3

4 high-density place like Delhi, would require either early and drastic action (e.g. ISO) or a  
5 highly compliant set of individuals, or a combination of these features.  
6

7 This work overall demonstrates the power of agent-based and population modeling to  
8 evaluate complicated interaction-based epidemiological phenomena. Clearly, there are  
9 limitations to this work (several are itemized below). But these agent and population  
10 approaches provide a platform for adding additional complexity. All of the figures  
11 demonstrate that quantitative results depend on complicated interplay among inputs.  
12 These results are important because they inform policy decisions. An equally important  
13 benefit of this type of work, but not often stated, is developing intuition about epidemic  
14 dynamics (in this case, with the effects of slums), to enable decision makers to reason  
15 about nuanced interactions among effects to a degree that is hard to obtain with other  
16 approaches that lack this level of detail.  
17  
18

19  
20 Despite the detailed modeling effort, there are limitations of this work and areas for  
21 improvement in the future. For example: (1) Examination of different population level  
22 base attack rates derived from different transmission probabilities. (2) Different  
23 susceptibilities and infectivity for individual agents; e.g., based on age. (3) Effects of  
24 asymptomatic infections (although we have addressed this to some extent with  
25 compliance and efficacy of interventions). (4) Seasonal effects.[46-47] (5) Effects of  
26 immunity for an individual from previous infections (in previous seasons). (6) Evaluation  
27 of interaction of different strains from season to season. (7) Comparison of tropical  
28 versus subtropical factors. (8) Evaluation of a specific outbreak scenario. (9) Impact of  
29 sickness on absenteeism from work and its economic ramifications. (10) Effects on rural  
30 versus urban populations. (11) Using combinations of interventions rather than one at a  
31 time; this was only done here in Figure 5. However, to disambiguate results, it is  
32 prudent to first examine individual interventions. (12) Effect of changing disease  
33 transmission rate for different activity types. (13) Effect of changing contact times at  
34 different locations. (14) To capture close-proximity transmission, one could use actual  
35 physical proximity. Here, we use colocation. Finally, just as changes in modeling details  
36 can change model results, so, too, changes in the conditions in actual outbreaks can  
37 change results; some of these factors are listed above. It is essentially impossible to  
38 capture all of these effects—many of which are unknown—down to the level of  
39 individual humans.  
40  
41  
42  
43

44  
45 Public health implications: This research demonstrates that modeling slum populations  
46 is important, not only for understanding disease dynamics, but also for designing  
47 effective control measures. Ignoring the influence of slum characteristics on their urban  
48 environment will significantly underestimate the speed of an outbreak and its extent,  
49 and hence will lead to misguided interventions by public health officials and policy  
50 planners. Lessons from this research can be applied in the field and observations  
51 collected from the field can provide valuable data to improve the models and validate  
52 the results. For example, our results show that a slum resident has about 50% greater  
53 total contact duration per day compared to a non-slum resident. This makes social  
54 distancing based interventions more taxing in the slum population. Public health policy  
55 makers may want to subsidize pharmaceutical resources for the slum population to  
56  
57  
58  
59  
60

## Main manuscript

1  
2  
3 make them more affordable. Similarly, we find women in slums have a higher number of  
4 contacts per day than their male counterparts whereas in non-slum regions, women  
5 have a fewer number of daily contacts than their male counterparts. This kind of  
6 information can be used to prioritize the distribution of limited resources, e.g. women  
7 could be given preference over males for vaccination in slum areas. This research  
8 provides simulation-based evidence that in general social distancing strategies are  
9 ineffective in slums because of a large number of contacts at home. Unless one applies  
10 complete isolation, which is not feasible in slums, just staying at home still keeps a large  
11 number of contacts and pathways of spread intact.  
12  
13  
14  
15  
16  
17  
18  
19  
20  
21  
22  
23  
24  
25  
26  
27  
28  
29  
30  
31  
32  
33  
34  
35  
36  
37  
38  
39  
40  
41  
42  
43  
44  
45  
46  
47  
48  
49  
50  
51  
52  
53  
54  
55  
56  
57  
58  
59  
60

1 Main manuscript  
2  
3

4 **Contributorship statement**

5 AA, SE, CJK, AM, MM, SS, AV designed and conceived the study. SC carried out the  
6 experiments and simulations. SC, CJK, AM performed data analysis. CJK, BL, AM, MM,  
7 EKN, MLW helped with reviewing the results and writing the paper.  
8  
9

10  
11  
12 **Competing Interests**

13 There are no competing interests.  
14  
15

16  
17 **Funding statement**

18 This work has been partially supported by the Defense Threat Reduction Agency  
19 (DTRA) (grant no. HDTRA1-11-1-0016 and HDTRA1-11-D-0016-0001), National  
20 Institutes of Health (NIH) (grant no. 1R01GM109718) and National Science Foundation  
21 (NSF) (grant no. CCF-1216000, CNS-1011769, and NRT-DESE-154362).  
22  
23  
24

25  
26 **Data Sharing Statement**

27 Data pertaining to figures and statistical analysis are partially provided in the  
28 supplementary file, and also can be obtained by contacting the corresponding author  
29 through email.  
30  
31  
32  
33  
34  
35  
36  
37  
38  
39  
40  
41  
42  
43  
44  
45  
46  
47  
48  
49  
50  
51  
52  
53  
54  
55  
56  
57  
58  
59  
60

1 Main manuscript  
2  
3

4 **REFERENCES**  
5

- 6 1. Thompson WW, Shay DK, Weintraub E, Brammer L, Cox N, Anderson LJ,  
7 Fukuda K. Mortality associated with influenza and respiratory syncytial virus in  
8 the United States. *JAMA* 2003 Jan 8;289(2):179-186.  
9  
10 2. Thompson WW, Shay DK, Weintraub E, Brammer L, Bridges CB, Cox NJ,  
11 Fukuda K. Influenza-associated hospitalizations in the United States. *JAMA* 2004  
12 Sep 15;292(11):1333-1340.  
13  
14 3. Chandra N. Influenza viruses circulate in Delhi throughout the year. March 2012.  
15 [http://indiatoday.intoday.in/story/influenza-viruses-circulate-in-delhi-throughout-](http://indiatoday.intoday.in/story/influenza-viruses-circulate-in-delhi-throughout-the-year/1/179252.html)  
16 [the-year/1/179252.html](http://indiatoday.intoday.in/story/influenza-viruses-circulate-in-delhi-throughout-the-year/1/179252.html)  
17  
18 4. Chen J, Chu S, Chungbaek Y, Khan M, Kuhlman C, Marathe A, Mortveit H,  
19 Vullikanti A, Xie D. Effect of modelling slum populations on influenza spread in  
20 Delhi. *BMJ Open* 2016a Sep 1;6(9):e011699.  
21  
22 5. Barrett C, Bisset K, Leidig J, Marathe A, Marathe M. Economic and social impact  
23 of influenza mitigation strategies by demographic class. *Epidemics* 2011 Mar  
24 31;3(1):19-31.  
25  
26 6. Liao S, Ma Y, Chen J, Marathe A. Paid Sick-Leave: Is It a Good Way to Control  
27 Epidemics? International Conference on Complex Sciences 2012 Dec 5 (pp.  
28 213-227). Springer International Publishing.  
29  
30 7. Dorratoltaj N, Marathe A, Lewis B, Swarup S, Eubank S, Abbas K. Cost-benefit  
31 Analysis of Vaccine-based Interventions to Control Pandemic Influenza. 3rd  
32 Conference on Modeling of Infectious Diseases. Institute of Mathematical  
33 Sciences, Chennai, India, November 2015.  
34  
35 8. Peasah SK, Purakayastha DR, Koul PA, Dawood FS, Saha S, Amarchand R,  
36 Broor S, Rastogi V, Assad R, Kaul KA, Widdowson MA, Lal RB, Krishnan A. The  
37 cost of acute respiratory infections in Northern India: a multi-site study. *BMC*  
38 *Public Health* 2015; 15: 330. Published online 2015 April 7.  
39  
40 9. WHO. Influenza vaccines. WHO position paper. *Weekly Epidemiol Record* 2005;  
41 80(33):279-87.  
42  
43 10. Integrated Disease Surveillance Program, Influenza Surveillance Lab Network.  
44 URL: <http://idsp.nic.in/index1.php?lang=1&level=1&sublinkid=5789&lid=3722>  
45  
46 11. Broor S, Krishnan A, Roy DS, Dhakad S, Kaushik S, Mir MA, Singh Y, Moen A,  
47 Chadha M, Mishra AC, Lal RB. Dynamic patterns of circulating seasonal and  
48 pandemic A(H1N1)pdm09 influenza viruses from 2007–2010 in and around  
49 Delhi, India. *PLoS ONE* 2012 Jan 2;7(1):e29129.  
50  
51  
52  
53  
54  
55  
56  
57  
58  
59  
60

## Main manuscript

12. Chadha MS, Broor S, Gunasekaran P, Potdar VA, Krishnan A, Chawla - Sarkar M, Biswas D, Abraham AM, Jalgaonkar SV, Kaur H, Klimov A. Multisite virological influenza surveillance in India: 2004–2008. *Influenza and other respiratory viruses* 2012 May 1;6(3):196-203.
13. Chadha MS, Hirve S, Dawood FS, Lele P, Deoshatwar A, Sambhudas S, Juvekar S, LaFond KE, Mott JA, Lal RB, Mishra AC. Burden of seasonal and pandemic influenza-associated hospitalization during and after 2009 A (H1N1) pdm09 pandemic in a rural community in India. *PloS ONE* 2013 May 15;8(5):e55918.
14. Nijman J. A study of space in Mumbai's slums. *Tijdschrift voor Economische en Sociale Geografie* 2010 Feb 1;101(1): 4-17.
15. Lofgren E, Fefferman NH, Naumov YN, Gorski J, Naumova EN. Influenza seasonality: underlying causes and modeling theories. *Journal of Virology* 2007 Jun 1;81(11):5429-36.
16. Baker M, McNicholas A, Garrett N, Jones N, Stewart J, Koberstein V, Lennon D. Household crowding a major risk factor for epidemic meningococcal disease in Auckland children. *The Pediatric Infectious Disease Journal* 2000 Oct 1;19(10):983-90.
17. Burström B, Diderichsen F, Smedman L. Child mortality in Stockholm during 1885–1910: the impact of household size and number of children in the family on the risk of death from measles. *American Journal of Epidemiology* 1999 Jun 15;149(12):1134-41.
18. Souza LS, Ramos EA, Carvalho FM, Guedes VM, Souza LS, Rocha CM, Soares AB, Velloso LD, Macedo IS, Moura FE, Siqueira M. Viral respiratory infections in young children attending day care in urban Northeast Brazil. *Pediatric Pulmonology* 2003 Mar 1;35(3):184-191.
19. Gulyani S, Bassett EM, Talukdar D. A tale of two cities: A multi-dimensional portrait of poverty and living conditions in the slums of Dakar and Nairobi. *Habitat International* 2014 Jul 31;43:98-107.
20. Acolin A, Chattaraj S, Wachter SM. Urban Governance and Development of Informality in China and India. Informal Real Estate Markets, Eugenie Birch, Shahana Chattaraj and Susan Wachter, eds, University of Pennsylvania Press, Forthcoming. 2014 Aug 18.
21. Madise NJ, Ziraba AK, Inungu J, Khamadi SA, Ezeh A, Zulu EM, Kebaso J, Okoth V, Mwau M. Are slum dwellers at heightened risk of HIV infection than other urban residents? Evidence from population-based HIV prevalence surveys in Kenya. *Health Place* 2012 Sep 30;18(5):1144-1152.

## Main manuscript

- 1  
2  
3  
4  
5  
6  
7  
8  
9  
10  
11  
12  
13  
14  
15  
16  
17  
18  
19  
20  
21  
22  
23  
24  
25  
26  
27  
28  
29  
30  
31  
32  
33  
34  
35  
36  
37  
38  
39  
40  
41  
42  
43  
44  
45  
46  
47  
48  
49  
50  
51  
52  
53  
54  
55  
56  
57  
58  
59  
60
22. Nossiter A. Cholera Epidemic Envelops Coastal Slums in West Africa. *New York Times*. Aug 22, 2012.
23. Desai VK, Kapadia SJ, Kumar P, Nirupam S. Study of measles incidence and vaccination coverage in slums of Surat city. *Indian J Community Med* 2003 Jan 1; 28(10).
24. Xia H, Nagaraj K, Chen J, Marathe MV. Synthesis of a high resolution social contact network for Delhi with application to pandemic planning. *Artif Intell Med* 2015; 65(2): 113-130.
25. Barrett CL, Beckman RJ, Khan M, Anil Kumar VS, Marathe MV, Stretz PE, Dutta T, Lewis B. Generation and analysis of large synthetic social contact networks. In Winter Simulation Conference 2009 Dec 13 (pp. 1003-1014). Winter Simulation Conference.
26. Bissett K, Cadena J, Khan M, Kuhlman CJ, Lewis B, Telionis PA. An integrated agent-based approach for modeling disease spread in large populations to support health informatics. In 2016 IEEE-EMBS International Conference on Biomedical and Health Informatics (BHI) 2016 Feb 24 (pp. 629-632). IEEE.
27. Chen J, Chu S, Chungbaek Y, Khan M, Kuhlman C, Marathe A, Mortveit H, Vullikanti A, Xie D. Supplemental Information for Effect of Modelling Slum Populations on Influenza Spread in Delhi. *BMJ Open* 2016b Sep 1;6(9):e011699. Available at: <http://bmjopen.bmj.com/content/6/9/e011699/DC1/embed/inline-supplementary-material-1.pdf>
28. Koopman, J.S. (2004). Modeling infection transmission. Annual Review of Public Health 303-326.
29. Liao S, Ma Y, Chen J, Marathe A. Paid Sick-Leave: Is It a Good Way to Control Epidemics? International Conference on Complex Sciences: Theory and Applications, December 57, Santa Fe, New Mexico. Springer series Lecture Notes of the Institute for Computer Sciences, Social Informatics and Telecommunications Engineering. Edited by Glass, Kristin and Colbaugh, Richard and Ormerod, Paul and Tsao, Je\_rey. Complex Sciences: Springer, vol. 12 pp 213-227.
30. Marathe A, Lewis B, Chen J, Eubank S. Sensitivity of household transmission to household contact structure and size. *PLoS ONE* 2011 Aug 1;6(8):e22461.
31. Kaji M, Watanabe A, Aizawa H. Differences in clinical features between Influenza A H1N1, A H3N2, and B in adult patients. *Respirology* 2003;8:231–233.

## Main manuscript

- 1  
2  
3  
4  
5  
6  
7  
8  
9  
10  
11  
12  
13  
14  
15  
16  
17  
18  
19  
20  
21  
22  
23  
24  
25  
26  
27  
28  
29  
30  
31  
32  
33  
34  
35  
36  
37  
38  
39  
40  
41  
42  
43  
44  
45  
46  
47  
48  
49  
50  
51  
52  
53  
54  
55  
56  
57  
58  
59  
60
32. Meeyai A, Praditsitthikorn N, Kotirum S, Kulpeng W, Putthasri W, Cooper BS, Teerawattananon Y. Seasonal influenza vaccination for children in Thailand: a cost-effectiveness analysis. *PLoS Med* 2015 May 26;12(5):e1001829.
  33. Longini IM, Nizam A, Xu S, Ungchusak K, Hanshaoworakul W, Cummings DA, Halloran ME. Containing pandemic influenza at the source. *Science* 2005 Aug 12;309(5737):1083-1087.
  34. Choudhry A, Singh S, Khare S, Rai A, Rawat DS, Aggarwal RK, Chauhan LS. Emergence of pandemic 2009 influenza A H1N1, India. *Indian J Med Res* 2012 Apr 1;135(4):534-537.
  35. Gurav YK, Pawar SD, Chadha MS, Potdar VA, Deshpande AS, Koratkar SS, Hosmani AH, Mishra AC. Pandemic influenza A(H1N1) 2009 outbreak in a residential school at Panchgani, Maharashtra, India. *Indian J Med Res* 2010;132:67-71.
  36. Broor S, Gupta S, Mohapatra S, Kaushik S, Mir MA, Jain P, Dar L, Lal RB. Emergence of 2009A/H1N1 cases in a tertiary care hospital in New Delhi, India. *Influenza and other respiratory viruses* 2011 Nov 1;5(6):e552-557.
  37. Ramamurthy N, Pillai LC, Gunasekaran P, Elango V. Influenza activity among the paediatric age group in Chennai. *Indian J Med Res* 2005 Jun 1;121(6):776-779.
  38. Crocker-Buque T, Mindra G, Duncan R, Mounier-Jack S. Immunization, Urbanization and Slums—A Systematic Review of Factors and Interventions. *BMC Public Health* 2017; 17(556):1-16.
  39. Vashishtha VM, Kalra A, Choudhury P. Influenza Vaccination in India: Position Paper of Indian Academy of Pediatrics. *Indian Pediatrics* 2013; 50: 867-874.
  40. Koul PA, Bali NK, Ali S, Ahmad SJ, Bhat MA, Mir H, Akram S, Khan UH. Poor Uptake of Influenza Vaccination in Pregnancy in Northern India. *Journal of Gynecology and Obstetrics*. 2014; 127:234-237.
  41. World Health Organization. Measures in School Settings. Pandemic (H1N1) 2009 Briefing note 10. 2009. ([http://www.who.int/csr/disease/swineflu/notes/h1n1\\_school\\_measures\\_20090911/en/](http://www.who.int/csr/disease/swineflu/notes/h1n1_school_measures_20090911/en/)).
  42. Jackson C, Mangtani P, Hawker J, Olowokure B, Vynnycky E. The Effects of School Closures on Influenza Outbreaks and Pandemics: Systematic Review of Simulation Studies. *PLoS ONE* 2014; 9:e97297.



## Main manuscript

- 1  
2  
3  
4  
5  
6  
7  
8  
9  
10  
11  
12  
13  
14  
15  
16  
17  
18  
19  
20  
21  
22  
23  
24  
25  
26  
27  
28  
29  
30  
31  
32  
33  
34  
35  
36  
37  
38  
39  
40  
41  
42  
43  
44  
45  
46  
47  
48  
49  
50  
51  
52  
53  
54  
55  
56  
57  
58  
59  
60
43. Bonds MH, Keenan DC, Rohani P, Sachs JD. Poverty Trap Formed by the Ecology of Infectious Diseases. *Proceedings of the Royal Society B* 2010 Apr 22; 277(1685):1185-1192.
44. Un-Habitat. The challenge of slums: global report on human settlements 2003. *Management of Environmental Quality: An International Journal* 2004 Jun 1; 15(3): 337-338.
45. Letendre K, Fincher CL, Thornhill R. Does infectious disease cause global variation in the frequency of intrastate armed conflict and civil war? *Biological Reviews* 2010 Aug 1;85(3):669-683.
46. Koul PA, Broor S, Saha S, Barnes J, Smith C, Shaw M, Chadha M, Lal RB. Differences in Influenza Seasonality by Latitude, Northern India. *Emerging Infectious Diseases* 2014 Oct;20(10), 1723-1726.
47. Hirve S, Newman LP, Paget J, Azziz-Baumgartner E, Fitzner J, Bhat N, Vandemaele K, Zhang W. Influenza Seasonality in the Tropics and Subtropics—When to Vaccinate? *PloS ONE* 2016 Apr 27;11(4):e0153003.

Main manuscript

**FIGURE 1:** Epidemic curves for base case and vaccination case. Each time point in the curve is an average over 25 replicates. The vaccines are given randomly to 30% of the entire population and the vaccine efficacy is 30%. For Network 2, epidemic curves are shown for total population and slum and non-slum subpopulations. ‘Intervene Total’ refers to the epidemic curve of the entire Delhi population when the vaccine intervention is applied. ‘Intervene Slum’ refers to the epidemic curve for just the slum population, and ‘Intervene Non-slum’ refers to the epidemic curve for just the non-slum population for the intervention case. Epidemic curves for a variety of compliances and efficacies are reported in Figures S1 and S2.

**FIGURE 2:** Mean cumulative infection rates for different subgroups in the two networks. Two vaccination rates ( $v = 30\%$ ,  $50\%$ ) and two vaccine efficacy rates ( $\alpha = 30\%$ ,  $70\%$ ) are considered. Individuals are chosen at random in the entire network for vaccination on day 0. Mean infection rates are calculated within each group. The last several lines in the plot for Network 1 are overlapping at the bottom because the mean infection rates are almost zero under those scenarios. ‘Total’ refers to the entire population of Delhi. ‘Slum’ and ‘Non-slum’ refer to slum and non-slum regions, respectively. ‘Male’ and ‘Female’ denote the total number of males and females in Delhi, respectively. Age groups are denoted by ‘Preschool’, ‘School’, ‘Adult’, and ‘Senior’.

(a) Total Delhi Network 1      (b) Total Delhi Network 2

**Figure 3.** Mean cumulative infection rates under different interventions for Network 1 and Network 2. The larger font numbers are fractions of populations that are infected and the smaller font numbers are counts of infected individuals. Colors of the boxes correspond to the values of the large numbers (i.e., fractions of infected), and the same scheme is used for both plots for comparisons—and for all plots in this paper. Five different compliance rates are examined (10%, 30%, 50%, 70% and 90%), and 4 types of intervention strategies (vaccination (VAX), close-schools (CS), stay-home (SHO) and isolation (ISO)) are considered. For vaccines, three different trigger points are considered: when the cumulative infection rate reaches 0% (VAX0), 1% (VAX1) and 5% (VAX5) of the total population. The vaccine efficacy is set at 30%. For close-schools, two trigger points are used: when cumulative infection rate reaches 1% (CS1) and 5% (CS5). Compliant individuals are selected at random from the entire Delhi population, and the cumulative infection rates are calculated for each network.

(a) Slum      (b) Non-slum

**Figure 4.** Heat map of cumulative infection rates in slum and non-slum regions of Network 2 under different intervention strategies. The colors of boxes correspond to the larger numbers in the boxes—the cumulative infection rates—and the two plots use the same scheme for comparisons. Darker colors correspond to higher infection rates. The smaller font numbers are counts of infected individuals. The vaccination efficacy is fixed at 30%. Five different compliance rates (10%, 30%, 50%, 70% and 90%) and 4 types of

Main manuscript

1  
2  
3 intervention strategies (vaccination (VAX), close-schools (CS), stay-home (SHO) and  
4 isolation (ISO)) are considered. For vaccines, three different trigger points are  
5 considered: when cumulative infection rate reaches 0% (VAX0), 1% (VAX1) and 5%  
6 (VAX5). For close-schools, two trigger points are used: when the cumulative infection  
7 rate reaches 1% (CS1) and 5% (CS5). Compliant individuals are selected randomly  
8 from the entire Delhi population, and the mean infection rates are calculated separately  
9 for the slum and non-slum subpopulations. Although not reported here, qualitatively  
10 similar results are found for other transmission rates, as well as for higher vaccine  
11 efficacy (70%). Base is the baseline case with no interventions. The smaller-font  
12 numbers under the infection rate show the actual number of infected individuals.  
13  
14  
15

16 **FIGURE 5:** Mean cumulative infection rates for each category listed on the x-axis, for  
17 Network 2 and Network 1, under four different intervention scenarios. The color scheme  
18 of the boxes are based on the large values in the boxes—the cumulative infection rates.  
19 Darker colors correspond to higher infection rates. Smaller font values are the number  
20 of infected individuals. The vaccine efficacy is set at 30%. VsSs refers to the case when  
21 vaccines and social distancing are both applied to slum residents; VnSn refers to the  
22 case when vaccines and social distancing are applied to non-slum residents. Similarly,  
23 VsSn means vaccines are given to slums and stay home is applied to non-slums; and  
24 VnSs means vaccines are given to non-slums and stay home is applied to slums. Base  
25 refers to the case where no intervention is applied. The smaller-font numbers under the  
26 infection rates show the actual number of infected individuals in each category listed on  
27 the x-axis.  
28  
29  
30  
31  
32  
33  
34  
35  
36  
37  
38  
39  
40  
41  
42  
43  
44  
45  
46  
47  
48  
49  
50  
51  
52  
53  
54  
55  
56  
57  
58  
59  
60

1  
2  
3  
4  
5  
6  
7  
8  
9  
10  
11  
12  
13  
14  
15  
16  
17  
18  
19  
20  
21  
22  
23  
24  
25  
26  
27  
28  
29  
30  
31  
32  
33  
34  
35  
36  
37  
38  
39  
40  
41  
42  
43  
44  
45  
46  
47  
48  
49  
50  
51  
52  
53  
54  
55  
56  
57  
58  
59  
60

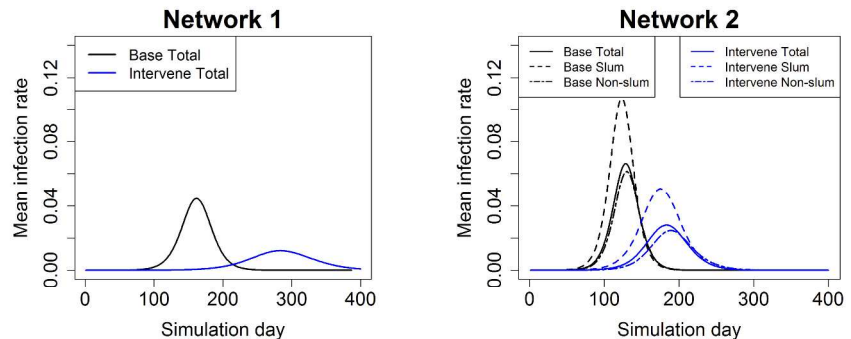

338x190mm (300 x 300 DPI)

review only

1  
2  
3  
4  
5  
6  
7  
8  
9  
10  
11  
12  
13  
14  
15  
16  
17  
18  
19  
20  
21  
22  
23  
24  
25  
26  
27  
28  
29  
30  
31  
32  
33  
34  
35  
36  
37  
38  
39  
40  
41  
42  
43  
44  
45  
46  
47  
48  
49  
50  
51  
52  
53  
54  
55  
56  
57  
58  
59  
60

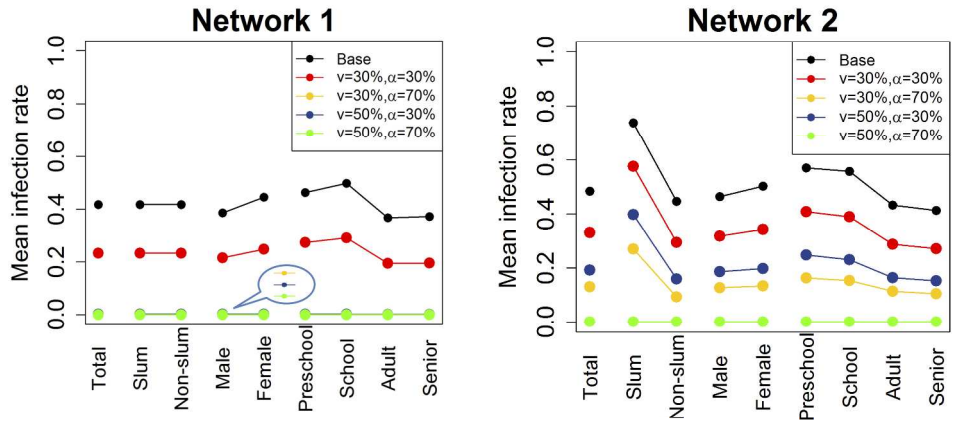

338x190mm (300 x 300 DPI)

review only

1  
2  
3  
4  
5  
6  
7  
8  
9  
10  
11  
12  
13  
14  
15  
16  
17  
18  
19  
20  
21  
22  
23  
24  
25  
26  
27  
28  
29  
30  
31  
32  
33  
34  
35  
36  
37  
38  
39  
40  
41  
42  
43  
44  
45  
46  
47  
48  
49  
50  
51  
52  
53  
54  
55  
56  
57  
58  
59  
60

| Intervention   | Base    | C <sub>1</sub> | C <sub>2</sub> | S <sub>1</sub> | S <sub>2</sub> | I <sub>1</sub> | I <sub>2</sub> | V <sub>1</sub> | V <sub>2</sub> |
|----------------|---------|----------------|----------------|----------------|----------------|----------------|----------------|----------------|----------------|
| V <sub>1</sub> | 0.36    | 0.23           | 0              | 0              | 0              | 0              | 0              | 0              | 0              |
| V <sub>2</sub> | 5038837 | 3228985        | 20921          | 221            | 97             |                |                |                |                |
| I <sub>1</sub> | 0.37    | 0.25           | 0.11           | 0.04           | 0.02           |                |                |                |                |
| I <sub>2</sub> | 5061754 | 3405459        | 1549547        | 539181         | 322258         |                |                |                |                |
| S <sub>1</sub> | 0.37    | 0.27           | 0.19           | 0.13           | 0.1            |                |                |                |                |
| S <sub>2</sub> | 5146506 | 3802876        | 2618588        | 1781022        | 1318401        |                |                |                |                |
| C <sub>1</sub> | 0.3     | 0              | 0              | 0              | 0              |                |                |                |                |
| C <sub>2</sub> | 4158127 | 648            | 62             | 35             | 23             |                |                |                |                |
| S <sub>1</sub> | 0.36    | 0.12           | 0              | 0              | 0              |                |                |                |                |
| S <sub>2</sub> | 4939914 | 1659965        | 241            | 89             | 51             |                |                |                |                |
| I <sub>1</sub> | 0.36    | 0.24           | 0.14           | 0.08           | 0.06           |                |                |                |                |
| I <sub>2</sub> | 5017949 | 3367475        | 1880956        | 1121321        | 881914         |                |                |                |                |
| C <sub>1</sub> | 0.37    | 0.27           | 0.19           | 0.15           | 0.16           |                |                |                |                |
| C <sub>2</sub> | 5112280 | 3738161        | 2615064        | 2125815        | 2169135        |                |                |                |                |
| Base           | 0.42    | 0.42           | 0.42           | 0.42           | 0.42           |                |                |                |                |
|                | 5772516 | 5772516        | 5772516        | 5772516        | 5772516        |                |                |                |                |

| Intervention   | Base    | C <sub>1</sub> | C <sub>2</sub> | S <sub>1</sub> | S <sub>2</sub> | I <sub>1</sub> | I <sub>2</sub> | V <sub>1</sub> | V <sub>2</sub> |
|----------------|---------|----------------|----------------|----------------|----------------|----------------|----------------|----------------|----------------|
| V <sub>1</sub> | 0.44    | 0.33           | 0.19           | 0              | 0              |                |                |                |                |
| V <sub>2</sub> | 6070999 | 4584539        | 2669426        | 18530          | 206            |                |                |                |                |
| I <sub>1</sub> | 0.44    | 0.34           | 0.21           | 0.1            | 0.04           |                |                |                |                |
| I <sub>2</sub> | 6087287 | 4654816        | 2967789        | 1350667        | 554670         |                |                |                |                |
| S <sub>1</sub> | 0.44    | 0.35           | 0.26           | 0.17           | 0.13           |                |                |                |                |
| S <sub>2</sub> | 6146453 | 4898048        | 3594239        | 2329038        | 1818146        |                |                |                |                |
| C <sub>1</sub> | 0.39    | 0.03           | 0              | 0              | 0              |                |                |                |                |
| C <sub>2</sub> | 5465084 | 478780         | 85             | 37             | 23             |                |                |                |                |
| S <sub>1</sub> | 0.44    | 0.31           | 0.08           | 0              | 0              |                |                |                |                |
| S <sub>2</sub> | 6047827 | 4323509        | 1098024        | 543            | 83             |                |                |                |                |
| I <sub>1</sub> | 0.45    | 0.37           | 0.31           | 0.29           | 0.27           |                |                |                |                |
| I <sub>2</sub> | 6191602 | 5188739        | 4357831        | 4018271        | 3675802        |                |                |                |                |
| C <sub>1</sub> | 0.47    | 0.44           | 0.43           | 0.42           | 0.4            |                |                |                |                |
| C <sub>2</sub> | 6470698 | 6101056        | 5883830        | 5766943        | 5600599        |                |                |                |                |
| Base           | 0.48    | 0.48           | 0.48           | 0.48           | 0.48           |                |                |                |                |
|                | 6704038 | 6704038        | 6704038        | 6704038        | 6704038        |                |                |                |                |

338x190mm (300 x 300 DPI)

review only

1  
2  
3  
4  
5  
6  
7  
8  
9  
10  
11  
12  
13  
14  
15  
16  
17  
18  
19  
20  
21  
22  
23  
24  
25  
26  
27  
28  
29  
30  
31  
32  
33  
34  
35  
36  
37  
38  
39  
40  
41  
42  
43  
44  
45  
46  
47  
48  
49  
50  
51  
52  
53  
54  
55  
56  
57  
58  
59  
60

|  |                          |            |         |         |         |         |
|--|--------------------------|------------|---------|---------|---------|---------|
|  |                          | 0.69       | 0.58    | 0.4     | 0       | 0       |
|  | <i>V<sub>air0</sub></i>  | 1263625    | 1041034 | 719517  | 7505    | 66      |
|  | <i>V<sub>air1</sub></i>  | 0.69       | 0.58    | 0.43    | 0.24    | 0.1     |
|  | <i>V<sub>air5</sub></i>  | 1296162    | 1052247 | 775240  | 426160  | 166606  |
|  | <i>V<sub>air10</sub></i> | 0.7        | 0.6     | 0.49    | 0.36    | 0.29    |
|  | <i>V<sub>air15</sub></i> | 1265497    | 1094158 | 890080  | 649544  | 525620  |
|  | <i>ISO</i>               | 0.65       | 0.08    | 0       | 0       | 0       |
|  | <i>ISO</i>               | 1168239    | 146106  | 20      | 7       | 3       |
|  | <i>SHO</i>               | 0.71       | 0.61    | 0.25    | 0       | 0       |
|  | <i>SHO</i>               | 1279142    | 1102671 | 460613  | 301     | 30      |
|  | <i>CS<sub>1</sub></i>    | 0.72       | 0.7     | 0.67    | 0.66    | 0.65    |
|  | <i>CS<sub>1</sub></i>    | 1311761    | 1260823 | 1215625 | 1194938 | 1171916 |
|  | <i>CS<sub>5</sub></i>    | 0.73       | 0.72    | 0.72    | 0.71    | 0.71    |
|  | <i>CS<sub>5</sub></i>    | 1326417    | 1309021 | 1298824 | 1292254 | 1283791 |
|  | <i>Base</i>              | 0.74       | 0.74    | 0.74    | 0.74    | 0.74    |
|  | <i>Base</i>              | 1337160    | 1337160 | 1337160 | 1337160 | 1337160 |
|  |                          | 10%        | 30%     | 50%     | 70%     | 90%     |
|  |                          | Compliance |         |         |         |         |

|  |                          |            |         |         |         |         |
|--|--------------------------|------------|---------|---------|---------|---------|
|  |                          | 0.4        | 0.29    | 0.16    | 0       | 0       |
|  | <i>V<sub>air0</sub></i>  | 4817373    | 3542870 | 1921714 | 11025   | 139     |
|  | <i>V<sub>air1</sub></i>  | 0.4        | 0.3     | 0.18    | 0.08    | 0.03    |
|  | <i>V<sub>air5</sub></i>  | 4831106    | 3602969 | 2192949 | 924508  | 368084  |
|  | <i>V<sub>air10</sub></i> | 0.41       | 0.32    | 0.22    | 0.14    | 0.11    |
|  | <i>V<sub>air15</sub></i> | 4880956    | 3803892 | 2704160 | 1679494 | 1292525 |
|  | <i>ISO</i>               | 0.36       | 0.03    | 0       | 0       | 0       |
|  | <i>ISO</i>               | 4298845    | 332675  | 65      | 30      | 20      |
|  | <i>SHO</i>               | 0.4        | 0.27    | 0.05    | 0       | 0       |
|  | <i>SHO</i>               | 4768685    | 3220638 | 637412  | 242     | 53      |
|  | <i>CS<sub>1</sub></i>    | 0.41       | 0.33    | 0.26    | 0.23    | 0.21    |
|  | <i>CS<sub>1</sub></i>    | 4879841    | 3927917 | 3142206 | 2823334 | 2503886 |
|  | <i>CS<sub>5</sub></i>    | 0.43       | 0.4     | 0.38    | 0.37    | 0.36    |
|  | <i>CS<sub>5</sub></i>    | 5144281    | 4792032 | 4585006 | 4474690 | 4316809 |
|  | <i>Base</i>              | 0.45       | 0.45    | 0.45    | 0.45    | 0.45    |
|  | <i>Base</i>              | 5366878    | 5366878 | 5366878 | 5366878 | 5366878 |
|  |                          | 10%        | 30%     | 50%     | 70%     | 90%     |
|  |                          | Compliance |         |         |         |         |

338x190mm (300 x 300 DPI)

review only

1  
2  
3  
4  
5  
6  
7  
8  
9  
10  
11  
12  
13  
14  
15  
16  
17  
18  
19  
20  
21  
22  
23  
24  
25  
26  
27  
28  
29  
30  
31  
32  
33  
34  
35  
36  
37  
38  
39  
40  
41  
42  
43  
44  
45  
46  
47  
48  
49  
50  
51  
52  
53  
54  
55  
56  
57  
58  
59  
60

|           |                    |                   |                       |                    |
|-----------|--------------------|-------------------|-----------------------|--------------------|
| $V_{sSs}$ | 0.44<br>6043049    | 0.55<br>989079    | 0.42<br>5053971       | 0.37<br>5176345    |
| $V_{sSn}$ | 0.43<br>5938919    | 0.58<br>1042116   | 0.41<br>4896803       | 0.36<br>4995753    |
| $V_{nSs}$ | 0.44<br>6023678    | 0.67<br>1217415   | 0.40<br>4806263       | 0.36<br>4986302    |
| $V_{nSn}$ | 0.44<br>6104571    | 0.72<br>1309577   | 0.40<br>4794993       | 0.36<br>5016324    |
| Base      | 0.48<br>6704038    | 0.74<br>1337160   | 0.45<br>5366878       | 0.42<br>5772516    |
|           | Total<br>Network 2 | Slum<br>Network 2 | Non-slum<br>Network 2 | Total<br>Network 1 |

127x114mm (300 x 300 DPI)

only



Supplemental Information

1  
2  
3  
4  
5  
6  
7  
8  
9  
10  
11  
12  
13  
14  
15  
16  
17  
18  
19  
20  
21  
22  
23  
24  
25  
26  
27  
28  
29  
30  
31  
32  
33  
34  
35  
36  
37  
38  
39  
40  
41  
42  
43  
44  
45  
46  
47  
48  
49  
50  
51  
52  
53  
54  
55  
56  
57  
58  
59  
60

**Disparities in Spread and Control of Influenza in Slums of Delhi**

A. Adiga, S. Chu, S. Eubank, S. Gupta, C. J. Kuhlman, B. Lewis, A. Marathe, M. Marathe, E. K. Nordberg, S. Swarup, A. Vullikanti and M. L. Wilson

For peer review only

## Supplemental Information

**Presentation of Results.**

For each set of input parameters, 25 replicates were run using agent-based simulation and the results presented are the average values over the 25 replicates. Also, 95% confidence intervals (CIs) are given when appropriate.

**Comparisons Between Network 1 and Network 2.**

Table S1 shows some differences between network1 and network 2 due to their different ways of modeling slum population. Note that these two networks are the same ones as those used in Chen et al.[1]. Further comparisons between the two networks are found in Chen et al.[2].

**Table S1.** Comparison of two networks as well as data sources for slum and non-slum Delhi, India.

|                                       | Network 1      |              | Network 2                                          |            |
|---------------------------------------|----------------|--------------|----------------------------------------------------|------------|
|                                       | Slum           | Non-slum     | Slum                                               | Non-slum   |
| Population Size                       | 0              | 13.8 million | 1.8 million                                        | 12 million |
| Average Household Size of Slum Region | 5.2            |              | 15.5                                               |            |
| Daily Activities                      | 33,890,156     |              | 39,077,861                                         |            |
| Number of Edges                       | 210,428,521    |              | 231,258,772                                        |            |
| Average Degree                        | 30.4           |              | 33.4                                               |            |
| Maximum Degree                        | 170            |              | 180                                                |            |
| Data Sources                          | MapMyIndia.com |              | MapMyIndia.com<br>Indiamart.com<br>MapMechanic.com |            |

Network 2 contains 298 slum zones, while network 1 models the whole population as non-slum. For network 1, the non-slum demographics and activities data is collected by survey through MapMyIndia.com. While for slum population, we collected additional data by Indiamart.com and MapMechanic.com for slum demographics and activities as well as slum polygons. More detailed demographic and activity differences can be found in the Chen et al.[1]

**Terminology and Abbreviations for Interventions.**

Table S2 contains abbreviations for different interventions and their meanings. Stay-at-home (SHO) and social isolation (ISO) interventions are applied to a person immediately after they become infected, while close-schools (CS) and vaccinations (VAX) may be applied after a specified fraction of the total population has been infected.

**Table S2:** Summary of abbreviations for interventions and their meanings.

## Supplemental Information

| Abbreviation | Definition                                                                                                                                                                                         |
|--------------|----------------------------------------------------------------------------------------------------------------------------------------------------------------------------------------------------|
| CS           | Close-schools: School-related interactions are eliminated.                                                                                                                                         |
| CSx          | Close-schools is implemented after the total fraction of the population that has been infected reaches x.                                                                                          |
| ISO          | Social isolation: a person who is socially isolated does not interact with any other person, even people in their home. Isolation is triggered only after a person becomes infectious.             |
| SHO          | Stay at home: All out-of-the-home activities for this person are eliminated, and this person only interacts with others at home. Stay at home is triggered only after a person becomes infectious. |
| VAX          | Vaccination: a person who is vaccinated has a reduced probability of contracting the virus.                                                                                                        |
| VAXx         | Vaccination of an individual occurs after the total fraction of the population that has been infected reaches x.                                                                                   |

Table S3 contains the variables used in simulations. The transmissibility corresponds to strong flu in Chen et al.[1] For vaccination, efficacy is either 30% or 70%. That is, for 30% efficacy, a person who gets vaccinated has reduced their susceptibility to infection by 30%.

**Table S3:** Summary of parameters and values used in simulations.

| Category                              | Values                                                                                                |
|---------------------------------------|-------------------------------------------------------------------------------------------------------|
| Networks of Delhi                     | Network 1 (does not model slums); Network 2 (models slums).                                           |
| Seeding                               | 20 people selected randomly over the entire population at time 0 as index cases.                      |
| Transmissibility                      | 0.000027.                                                                                             |
| Intervention approaches.              | Base case (no intervention); close-schools (CS); stay-home (SHO); isolation (ISO); vaccination (VAX). |
| Intervention/compliance rates.        | 10%, 30%, 50%, 70%, 90%.                                                                              |
| Efficacy of vaccination intervention. | 30%, 70%.                                                                                             |
| Intervention trigger time             | Cumulative infection rate reaches 0%, 1% and 5%.                                                      |
| Simulation replicates                 | 25                                                                                                    |

### The Agent Epidemic States and Disease Model.

An SEIR, Susceptible (S), Exposed (E), Infectious (I) and Removed or Recovered (R) model is considered within each individual. An infectious person spreads the disease to each susceptible neighbor independently with a probability referred to as the transmission probability, given by

$$p = \lambda (1 - (1 - \tau)^{\Delta t}),$$

## Supplemental Information

where  $\lambda$  is a scaling factor to lower the probability (e.g., in the case of vaccination),  $\tau$  is the transmissibility and  $\Delta t$  is the duration of interaction in minutes. Durations of contact are labels on the network edges. A susceptible person undergoes independent trials from all of its neighbors that are infectious. The transmission probability is a function of the number and duration of contacts.[3] This is selected to simulate an Influenza model resulting in a  $R_0=1.26$  (cumulative attack rate 42%, corresponding to a transmissibility of 0.000027 per minute of contact time) for Network 1, and  $R_0=1.39$  (cumulative attack rate 48%) for Network 2.[4] This transmissibility value is used uniformly throughout this study and corresponds to the probability at which an infectious node infects a susceptible node per minute of contact.

At each time (day), if an infectious person infects a susceptible person, the susceptible person transitions to the exposed (or incubating) state. The exposed person has contracted Influenza but cannot yet spread it to others. The incubation period is assigned per person, according to the following distribution: 1 day (30%); 2 days (50%); 3 days (20%). At the end of the exposed or incubation period, the person switches to an infected state. The duration of infectiousness is assigned per person, according to the distribution: 3 days (30%); 4 days (40%); 5 days (20%); 6 days (10%). After the infectious period, the person recovers and stays healthy for the simulation period. This sequence of state transitions is irreversible and is the only possible disease progression.

## Epidemic Curves for Other Interventions, for Varying Efficacy and Compliances.

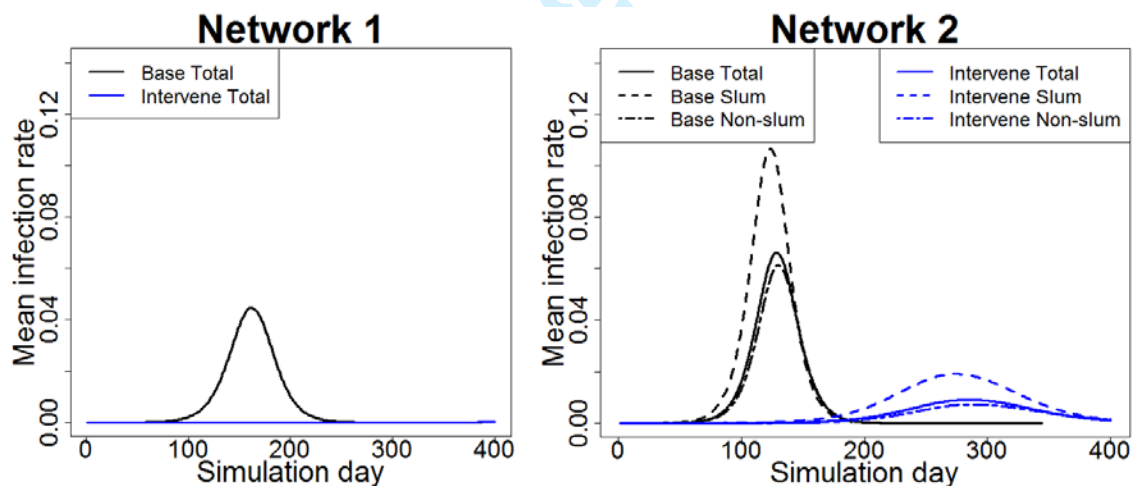

**Figure S1:** Epidemic curves for the base case and the vaccination case. The vaccines are given randomly to 50% of the entire population, and the vaccine efficacy is assumed to be 30%. The transmissibility is 0.000027.

Supplemental Information

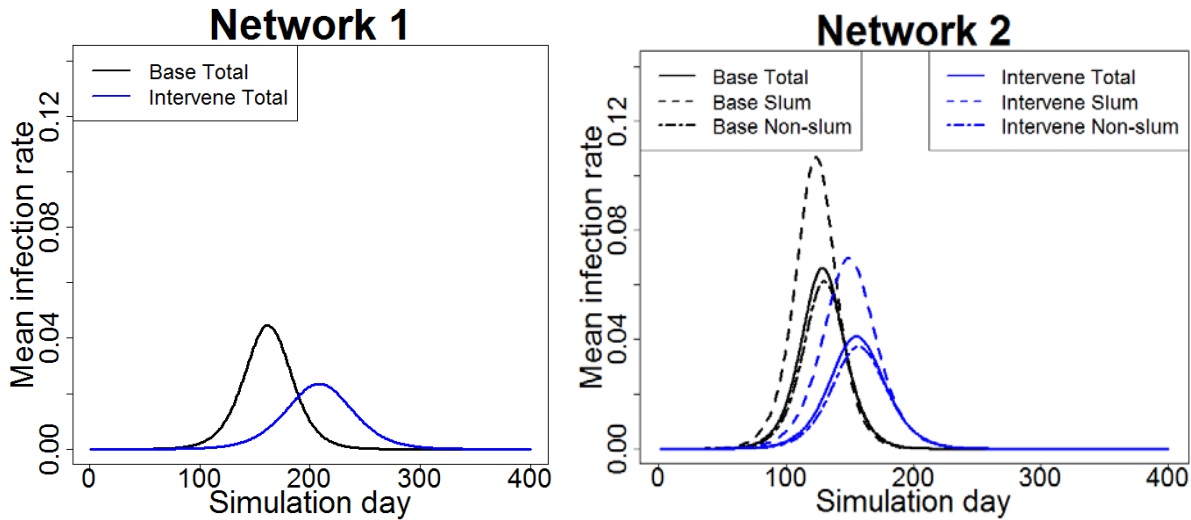

**Figure S2:** Epidemic curves for the base case and vaccination case. The vaccines are given randomly to 10% of the entire population and the vaccine efficacy is 70%. The transmissibility is 0.000027.

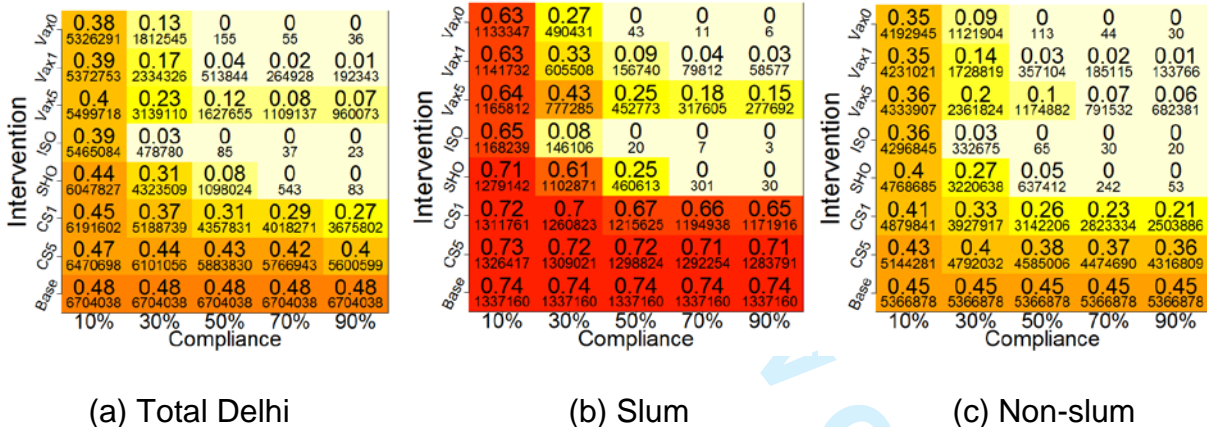

**Figure S3.** Heat map of mean cumulative infection rates in Delhi, and slum and non-slum regions under different intervention strategies for Network 2. The vaccination efficacy is fixed at 70%. Five different compliance rates, i.e., 10%, 30%, 50%, 70% and 90% and 4 types of intervention strategies, i.e. vaccination (VAX), close-schools (CS), stay-home (SHO) and isolation (ISO), are considered. For vaccines, three different trigger points are considered: when cumulative infection rate reaches 0% (VAX0), 1% (VAX1) and 5% (VAX5). For close-schools, two trigger points are used i.e. when cumulative infection rate reaches 1% (CS1) and 5% (CS5). Compliant individuals are selected randomly from the entire Delhi population and the mean cumulative infection rates are calculated separately for the total population, and slum and non-slum subpopulations. Base is the baseline case with no interventions. The smaller-font numbers under the infection rate show the actual number of infected individuals. Darker colors correspond to higher infection rates.

## Supplemental Information

### Tabulations of Basic Results: Comparisons between Networks 1 and 2 for Compliance of 30% and Efficacy of 30%.

Table S4 shows results when 30% of the population that is selected uniformly at random is vaccinated with a vaccine that is 30% effective. The contrast between the two populations is even greater when considering interventions. The peak infection rate of the entire population increases by 123.2% (95% CI: 122.7%-123.7%) in Network 2 compared to Network 1 for the intervention, versus 47.6% difference between the networks in Table S8. The time to peak decreases by 35.7% (95% CI: 32.9%-38.8%) in Network 2 compared to that in Network 1, for the intervention case, compared to only 20.84% percentage change between the two Networks for the base case in Table S8. The cumulative infection rate (or attack rate) is also underestimated, which is 42.2% (95% CI: 41.5%-42.8%) greater on average in Network 2 compared to Network 1 for the intervention case. Hence, the differences between key epidemic results for Networks 1 and 2 that are generated for the intervention case are even more pronounced than they are for the base case. These values are all statistically significant.

**Table S4:** Comparisons of key epidemic parameters for Networks 1 and 2 for a vaccination intervention before the epidemic starts (VAX0), where the vaccine efficacy is 30% and the compliance rate is 30%.

| Vaccination               | Network 1 | Network 2 | Compare-absolute               | Compare-relative                     |
|---------------------------|-----------|-----------|--------------------------------|--------------------------------------|
| Time to Peak              | 286       | 184       | 102<br>(95% CI: 94-111)        | 35.7%<br>(95% CI: 32.9%-38.8%)       |
| Peak Infection Rate       | 1.34%     | 2.99%     | 1.65%<br>(95% CI: 1.64%-1.66%) | 123.19%<br>(95% CI: 122.69%-123.65%) |
| Cumulative Infection Rate | 23.3%     | 33.1%     | 9.82%<br>(95% CI: 9.67%-9.96%) | 42.17%<br>(95% CI: 41.51%-42.77%)    |

Table S5 shows the effect of delay in applying interventions. The numbers show the percentage difference in cumulative infection rate in slums and non-slums of Network 2 for the specified interventions and compliance rates at different trigger levels. For example, the value 30.55% at 0.1% compliance means that for intervention close-schools, where this intervention is implemented after 5% of the total population is infected, the fraction of people in slums that get infected is 30.55% greater than the fraction of non-slum residents who get infected.

**Table S5.** Differences of epidemic size between slum and non-slum regions for Network 2 for base case (no intervention); close-schools (CS) after 1% total outbreak fraction (CS1) and after 5% total outbreak fraction (CS5); stay at home (SHO); social isolation (ISO); vaccination (VAX) after 1% total outbreak fraction (VAX1) and after 5% total outbreak fraction (VAX5), under various compliance rates. The vaccination efficacy is 30%.

| Compliance | Base   | CS5    | CS1    | SHO    | ISO    | VAX5   | VAX1   |
|------------|--------|--------|--------|--------|--------|--------|--------|
| 0.1        | 29.30% | 30.55% | 31.94% | 31.06% | 28.85% | 29.37% | 29.27% |
| 0.3        | 29.30% | 32.52% | 37.03% | 34.18% | 5.31%  | 28.85% | 28.21% |

## Supplemental Information

|     |        |        |        |        |       |        |        |
|-----|--------|--------|--------|--------|-------|--------|--------|
| 0.5 | 29.30% | 33.67% | 41.07% | 20.16% | 0.00% | 26.72% | 24.62% |
| 0.7 | 29.30% | 34.23% | 42.57% | 0.01%  | 0.00% | 21.94% | 15.87% |
| 0.9 | 29.30% | 35.07% | 43.95% | 0.00%  | 0.00% | 18.31% | 7.25%  |

Table S6 examines the difference in effects of interventions on the cumulative infection rate in Network 2. These data use both the stay home (SHO) and the isolation (ISO) interventions as base cases. Each entry represents the difference between the cumulative infection rates for the specified pharmaceutical interventions and SHO or ISO. For example, 18.03% means that the cumulative infection rate for vaccinating after 5% of the population is infected, is 18.03% greater than that for the intervention of SHO; 31.92% means that the cumulative infection rate for vaccinating after 5% of the population is infected is 31.92% greater than that for the intervention of ISO. Thus, the larger the magnitude of a positive number, the greater the effectiveness of SHO or ISO compared to the specified pharmaceutical intervention.

**Table S6.** Differences in epidemic size between stay at home (SHO) interventions, social isolation (ISO) interventions and pharmaceutical interventions (VAX0, VAX1, VAX5), under various compliance rates. The compliance rate and efficacy for vaccination is 30% and 30%, respectively.

| Compliance | Vax5-SHO | Vax1-SHO | Vax0-SHO | VAX5-ISO | VAX1-ISO | VAX0-ISO |
|------------|----------|----------|----------|----------|----------|----------|
| 0.1        | 0.71%    | 0.29%    | 0.17%    | 4.92%    | 4.49%    | 4.38%    |
| 0.3        | 4.15%    | 2.39%    | 1.89%    | 31.92%   | 30.17%   | 29.66%   |
| 0.5        | 18.03%   | 13.51%   | 11.35%   | 25.96%   | 21.44%   | 19.28%   |
| 0.7        | 16.82%   | 9.75%    | 0.13%    | 16.82%   | 9.76%    | 0.13%    |
| 0.9        | 13.13%   | 4.01%    | 0.00%    | 13.13%   | 4.01%    | 0.00%    |

### Effect of intervention on Network 2, With and Without Interventions.

The comparison between vaccination intervention and the base case in Network 2 is detailed in Table S7 below.

In Network 2, for the total population, vaccination delays the time to peak infection by 43.27% (95% CI: 40.14%-46.41%) relatively, from 128 to 184 days on average, while the peak infection rate is reduced by about 3.88% from 2.99% to 6.87% on average (56.47% relatively with 95% CI: 56.35%-56.56%). The total infection rate is reduced by 15.31% from 33.12% to 48.43% (31.62% relatively with 95% CI: 31.57%-31.67%).

In slum regions in Network 2, vaccination delays the time to peak infection by 43.09% (95% CI: 39.78%-46.4%) relatively, from 123 to 176 days on average, while the peak infection rate is reduced by about 5.70% from 5.42% to 11.12% on average (51.26% relatively with 95% CI: 50.88%-51.64%). The total infection rate in slums is reduced by 16.35% from 57.53% to 73.88% (22.13% relatively with 95% CI: 22.07% to 22.19%).

## Supplemental Information

In non-slum regions in Network 2, the time to peak is delayed by 43.44% (95% CI: 40.32%-46.56%) relatively, from 130 to 186 days on average, while the peak infection rate is reduced by about 3.68% from 2.69% to 6.36% on average (57.79% relatively with 95% CI: 57.64%-57.94%). The total infection rate in non-slums is reduced by 15.16% from 44.60% to 29.45% (33.98% relatively with 95% CI: 33.93% -34.03%).

**Table S7:** Comparisons between the base and vaccination cases for Network 2. The three parameters (time to peak, peak infection rate and cumulative infection rate) are broken out, and for each, values for the total population, and slum and non-slum subpopulations are given. The vaccination rate is 30% and efficacy is 30% for those receiving the vaccine.

| Network 2,<br>Time to Peak | Base | Vaccination | Compare-absolute   | Compare-Relative                       |
|----------------------------|------|-------------|--------------------|----------------------------------------|
| Total                      | 128  | 184         | 55 (95% CI: 51-59) | 43.27%<br>(95% CI: 40.14%-46.41%)      |
| Slum                       | 123  | 176         | 53 (95% CI: 49-57) | 43.09%<br>(95% CI: 39.78%-46.4%)       |
| Non-Slum                   | 130  | 186         | 56 (95% CI: 52-60) | 43.44%<br>(95% CI: 40.32% -<br>46.56%) |

| Network 2,<br>Peak Infection<br>Rate | Base   | Vaccination | Compare-absolute                    | Compare-Relative                     |
|--------------------------------------|--------|-------------|-------------------------------------|--------------------------------------|
| Total                                | 6.87%  | 2.99%       | -3.88%<br>(95% CI: -3.870% -3.884%) | -56.46%<br>(95% CI: -56.35% -56.56%) |
| Slum                                 | 11.12% | 5.42%       | -5.70%<br>(95% CI: -5.66% -5.74%)   | -51.26%<br>(95% CI: -50.88% -51.64%) |
| Non-Slum                             | 6.36%  | 2.69%       | -3.68%<br>(95% CI: -3.67% -3.69%)   | -57.79%<br>(95% CI: -57.64% -57.94%) |

| Network 2,<br>Cumulative<br>Infection Rate | Base   | Vaccination | Compare-absolute                     | Compare-Relative                     |
|--------------------------------------------|--------|-------------|--------------------------------------|--------------------------------------|
| Total                                      | 48.43% | 33.12%      | -15.31%<br>(95% CI: -15.29% -15.34%) | -31.62%<br>(95% CI: -31.57% -31.67%) |
| Slum                                       | 73.88% | 57.53%      | -16.35%<br>(95% CI: -16.30% -16.39%) | -22.13%<br>(95% CI: -22.07% -22.19%) |
| Non-Slum                                   | 44.60% | 29.45%      | -15.16%<br>95% CI: (-15.14% -15.18%) | -33.98%<br>(95% CI: -33.93% -34.03%) |



## Supplemental Information

Table S8 summarizes differences in key epidemic parameters for Networks 1 and 2 for the base case with no interventions. The peak infection rate is the maximum fraction of individuals who are infected on any day, the time to peak is the day on which the peak infection rate occurs, and cumulative infection rate is the cumulative fraction of individuals who get infected in the epidemic. Under the base case, the peak infection rate in Network 2 is 47.6% (95% CI: 47.4%-47.8%) greater compared to that in Network 1 ( $47.6\% = (6.87\% - 4.65\%) / 4.65\%$ ). The time to peak infection for Network 2 is decreased by 20.8% (95% CI: 19.2%-22.7%) compared to that in Network 1. The cumulative infection rate (or attack rate) is also underestimated under Network 1 by 16.1% (95% CI: 16.1%-16.2%) compared to Network 2. These results, presented in the main paper, are tabulated here in Table S8 for convenience and comparison.

**Table S8:** Comparisons of key epidemic parameters for Networks 1 and 2 for the base case.

| Base                      | Network 1 | Network 2 | Compare-absolute                  | Compare-relative                  |
|---------------------------|-----------|-----------|-----------------------------------|-----------------------------------|
| Time to Peak              | 162       | 128       | 34<br>(95% CI: 31-37)             | 20.84%<br>(95% CI: 19.19%-22.71%) |
| Peak Infection Rate       | 4.65%     | 6.87%     | 2.215%<br>(95% CI: 2.206%-2.224%) | 47.6%<br>(95% CI: 47.4%-47.8%)    |
| Cumulative Infection Rate | 41.70%    | 48.43%    | 6.73%<br>(95% CI: 6.71%-6.75%)    | 16.1%<br>(95% CI: 16.1%-16.2%)    |

### Effect of intervention on Network 1, With and Without Interventions.

In Network 1, vaccination delays the time to peak infection by 76.41%, from 162 to 286 days on average, with 95% CI: 71.53%-81.28%. The peak infection rate is reduced by 3.3121 percentage points, from 1.34% to 4.65%, which is a relative percentage difference (RPD) of -71.20%, with 95% CI: -71.02% to -71.38%. These and cumulative infection rate data are given in Table S9.

**Table S9:** Comparisons of a vaccination intervention (30% vaccination rate, 30% efficacy of a vaccination) with the base case in Network 1 Delhi.

| Network 1, Total          | Base  | Vaccination | Compare-absolute                  | Compare-relative                  |
|---------------------------|-------|-------------|-----------------------------------|-----------------------------------|
| Time to Peak              | 162   | 286         | 124<br>(95% CI: 116-132)          | 76.41%<br>(95% CI: 71.53%-81.28%) |
| Peak Infection Rate       | 4.65% | 1.34%       | 3.31%<br>(95% CI: 3.30%-3.32%)    | 71.20%<br>(95% CI: 71.02%-71.38)  |
| Cumulative Infection Rate | 41.7% | 23.3%       | 18.40%<br>(95% CI: 18.25%-18.55%) | 44.13%<br>(95% CI: 43.77%-44.48%) |

Tables S7 and S9 show that, generally, Network 1 is more responsive to intervention than Network 2. In Network 1, the percentage changes in time-to-peak, peak infection rate, and cumulative infection rate, due to intervention, are 76.4%, -71.2%, and -44.1%,

## Supplemental Information

respectively. For Network 2, these values are 43.3%, -56.5%, and -31.6%, respectively. The reason for lower impact in Network 2 is the greater connectivity of households in slums, which helps drive the contagion.

### Effect of interventions on slum and non-slum subpopulations of Network 2, compared to the base case.

The data used in comparing key outbreak parameters in slum and non-slum regions are taken from Table S7, and the corresponding epidemic curves are in Figure 1. The percentage change in peak infection rate due to intervention in slum (-51.3%) and non-slum (-57.8%) regions in Network 2, are comparable, although the magnitudes of the peak infections in slums are about twice those in the non-slum regions. For the cumulative infection rates, the relative drop from the intervention is greater for the non-slum (-34.0% vs. -22.1%) population than it is for the slum population, but the absolute drop is about the same (-16.3% vs. -15.1%).

**Table S10:** Comparison of results between slum and non-slum in Network 2. The input data is the same as in Table S7.

| Network 2, Base           | Slum   | Nonslum | Compare-absolute                    | Compare-relative                  |
|---------------------------|--------|---------|-------------------------------------|-----------------------------------|
| Time to Peak              | 123    | 130     | 7(95% CI: 4-9)                      | 5.26%<br>(95% CI: 3.37%-7.16%)    |
| Peak Infection Rate       | 1.12%  | 6.36%   | 4.76%<br>(95% CI: 4.72%-4.80%)      | 42.79%<br>(95% CI: 42.46%-43.14%) |
| Cumulative infection rate | 73.88% | 44.60%  | 29.25%<br>(95% CI: 29.25% - 29.31%) | 39.63%<br>(95% CI: 39.59%-39.67%) |

| Network 2, Vaccination    | Slum   | Nonslum | Compare-absolute                  | Compare-relative                  |
|---------------------------|--------|---------|-----------------------------------|-----------------------------------|
| Time to Peak              | 176    | 186     | 10(95% CI: 5-15)                  | 5.23%<br>(95% CI: 2.58%-8.46%)    |
| Peak Infection Rate       | 5.42%  | 2.69%   | 2.74%<br>(95% CI: 2.71% - 2.76%)  | 50.46%<br>(95% CI: 50.06%-50.86%) |
| Cumulative infection rate | 57.53% | 29.45%  | 28.08%<br>(95% CI: 28.04%-28.12%) | 48.82%<br>(95% CI: 48.74%-48.89%) |

Figure S4 contains the percentage changes between the base case and intervention case for Networks 1 and 2 for the three parameters in the legend, and further breaks down Network 2 into slum and non-slum subpopulations. This plot provides a summary of differences between the base and intervention cases. For all four conditions considered, the intervention reduces the severity of an epidemic. It delays the time when the infection peaks, and reduces the peak infection and the cumulative infection rates. Note that the intervention has a larger effect on the epidemics when applied to Network 1, as consistent with Figure 1.

## Supplemental Information

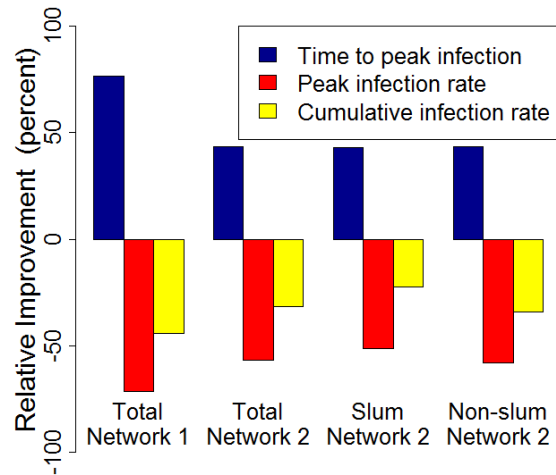

**Figure S4:** Effects of vaccination on time to peak infection, peak infection rate, and cumulative infection rate. The intervention is 30% vaccination rate and 30% vaccine efficacy. Each bar refers to the average value of the relative difference over 25 runs. Vaccination is more effective for Network 1 than Network 2, while, for Network 2, it is slightly more effective for the non-slum population than slum. Details of the data associated with this plot are provided in Tables S7 and S9.

Figure S5 provides the same data as in Figure S7, but now the data are provided as absolute differences, rather than as percentage changes. (There are three separate plots owing to the different ranges in absolute differences. Qualitatively, the time to peak infection (blue bars) does not change between the two networks and the two subpopulations of Network 2 (Figure S4 versus Figure S5(a)). However, the red bars in Figure S4 are qualitatively different from those in Figure S5(b), when considering absolute changes. That is, the magnitude of the percentage change in peak infection rate between the base and intervention cases is greatest in Network 1 (Figure S4, red bars), while in Figure S5(b), it is least on an absolute change basis. Similarly, the slum population in Network 2 shows the least percentage change in Figure S4, but the greatest absolute change in Figure S5(b). Rankings of the subpopulations in Network 2 is also reversed for cumulative infection rate: the percentage change is greatest in the non-slum region, while it is greatest for the slum regions in absolute terms.

Supplemental Information

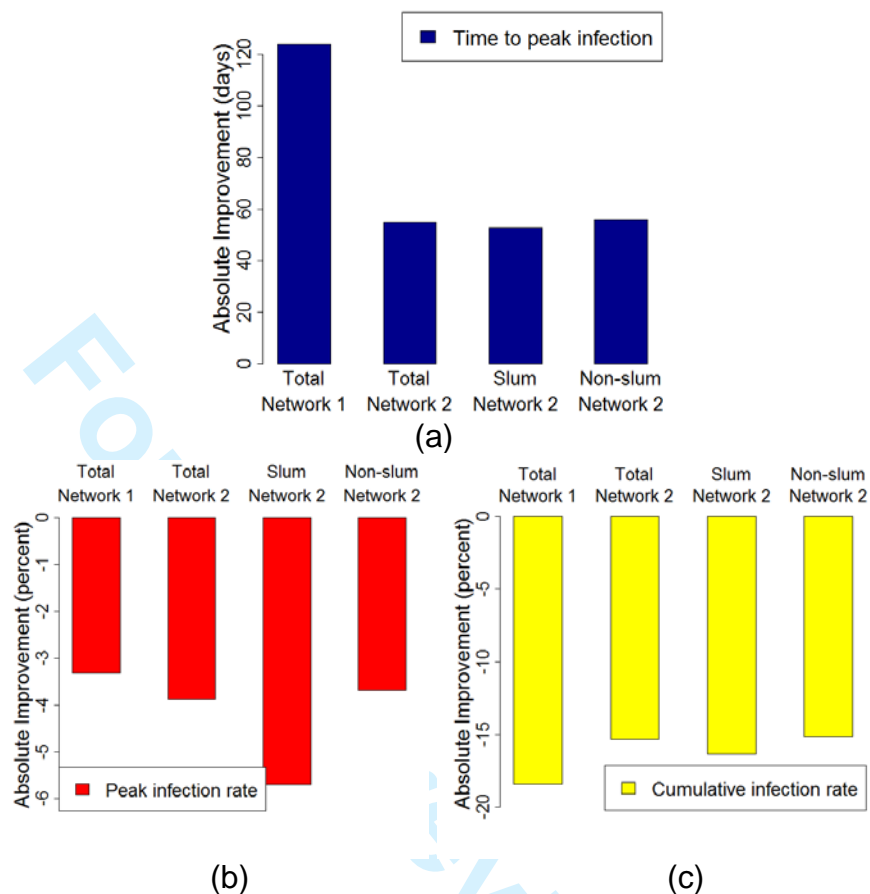

**Figure S5:** Comparison of absolute difference in improvement; the relative differences are shown in Figure S7. Absolute differences vary across the three parameters, so each is given on a separate scale. Data are summarized in Tables S7 and S9.

**Evaluation of Network 2 Home and School Contacts.**

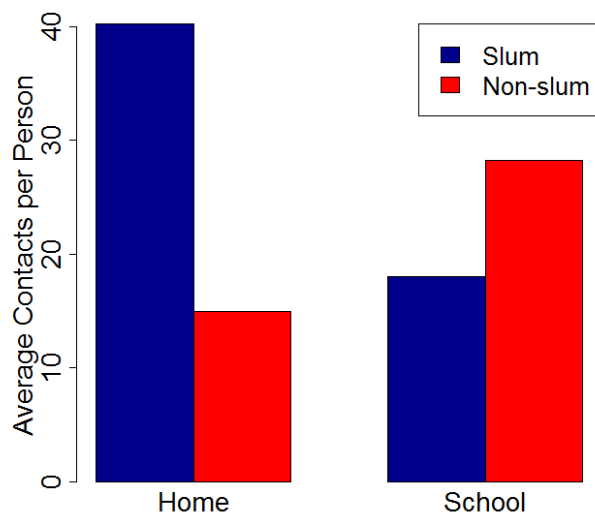

## Supplemental Information

**Figure S6:** Comparison of average contacts per person in slum and non-slum regions for home and school activity types in Network 2.

### Evaluation of Network 2 Edges Transmitting Infection.

Figure S7 provides counts of edges used to transmit infection for a base case simulation in Network 2 of Figure 1 of the main text. Edges are broken down by activity types of people who are interacting during transmission. Data are also broken down by the classifications of individuals interacting (e.g., slum and nonslum, see legend).

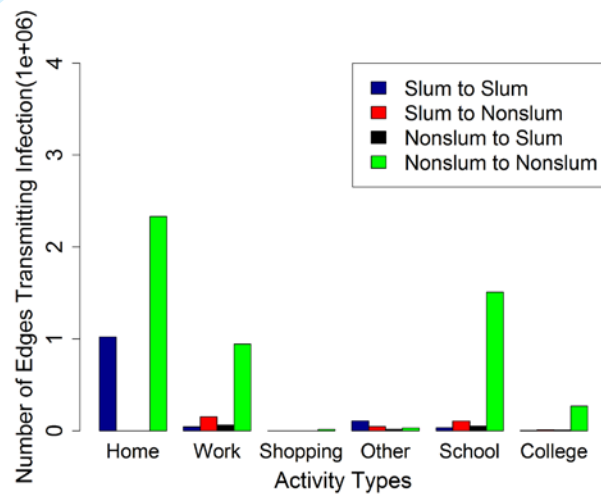

**Figure S7.** Data for Network 2. Number of edges transmitting infection (in millions) for each of the four types of interactions between slum and nonslum individuals (see legend) and for each activity type. The number of slum-to-nonslum edges is greater than nonslum-to-slum ones because once infection gets into a slum household, it may spread within the household more (because there are more people and connections). Thus, a slum household carries more infection to its interactions with nonslum people. The “Other” activity category, like home activity, shows more edges carrying infection for slum-to-slum interactions than slum-to-nonslum, which is consistent with Figures S4 and S6 of Chen et al.[2], where further network characteristics are given.

## Supplemental Information

## References

1. Chen J, Chu S, Chungbaek Y, Khan M, Kuhlman C, Marathe A, Mortveit H, Vullikanti A and Xie D. Effect of Modeling Slum Populations on Influenza Spread in Delhi. *BMJ Open*, Vol. 6, Issue 9, 2016a.
2. Chen J, Chu S, Chungbaek Y, Khan M, Kuhlman C, Marathe A, Mortveit H, Vullikanti A, Xie D. Supplemental Information for Effect of Modelling Slum Populations on Influenza Spread in Delhi. *BMJ Open*, 2016b, Sep 1;6(9):e011699.  
Available at: <http://bmjopen.bmj.com/content/6/9/e011699/DC1/embed/inline-supplementary-material-1.pdf>
3. Yang Y, Sugimoto JD, Halloran ME, Basta NE, Chao DL, Matrajt L, Potter G, Kenah E, Longini IM. The transmissibility and control of pandemic influenza A (H1N1) virus. *Science* 2009 Oct 30;326(5953):729-733.
4. Jesan T, Menon G, Sinha S. Epidemiological dynamics of the 2009 influenza A(H1N1) v outbreak in India. *Current Science* (00113891) 2011; 100(7): 1051.

# BMJ Open

## Disparities in Spread and Control of Influenza in Slums of Delhi: Findings From An Agent-Based Modeling Study

|                                 |                                                                                                                                                                                                                                                                                                                                                                                                                                                                                                                                                                                                                                                                                                                                                                                                                                                                                                                                                                                                                                                                                                                                                                                                                                                                                 |
|---------------------------------|---------------------------------------------------------------------------------------------------------------------------------------------------------------------------------------------------------------------------------------------------------------------------------------------------------------------------------------------------------------------------------------------------------------------------------------------------------------------------------------------------------------------------------------------------------------------------------------------------------------------------------------------------------------------------------------------------------------------------------------------------------------------------------------------------------------------------------------------------------------------------------------------------------------------------------------------------------------------------------------------------------------------------------------------------------------------------------------------------------------------------------------------------------------------------------------------------------------------------------------------------------------------------------|
| Journal:                        | <i>BMJ Open</i>                                                                                                                                                                                                                                                                                                                                                                                                                                                                                                                                                                                                                                                                                                                                                                                                                                                                                                                                                                                                                                                                                                                                                                                                                                                                 |
| Manuscript ID                   | bmjopen-2017-017353.R2                                                                                                                                                                                                                                                                                                                                                                                                                                                                                                                                                                                                                                                                                                                                                                                                                                                                                                                                                                                                                                                                                                                                                                                                                                                          |
| Article Type:                   | Research                                                                                                                                                                                                                                                                                                                                                                                                                                                                                                                                                                                                                                                                                                                                                                                                                                                                                                                                                                                                                                                                                                                                                                                                                                                                        |
| Date Submitted by the Author:   | 27-Sep-2017                                                                                                                                                                                                                                                                                                                                                                                                                                                                                                                                                                                                                                                                                                                                                                                                                                                                                                                                                                                                                                                                                                                                                                                                                                                                     |
| Complete List of Authors:       | Adiga , Abhijin ; Network Dynamics and Simulation Sciences Laboratory, Biocomplexity Institute, Virginia Tech<br>Chu, Shuyu; Network Dynamics and Simulation Sciences Laboratory, Biocomplexity Institute, Virginia Tech<br>Eubank, Stephen; Network Dynamics and Simulation Sciences Laboratory, Biocomplexity Institute, Virginia Tech<br>Kuhlman, Christopher ; Network Dynamics and Simulation Sciences Laboratory, Biocomplexity Institute, Virginia Tech<br>Lewis, Bryan ; Network Dynamics and Simulation Sciences Laboratory, Biocomplexity Institute, Virginia Tech<br>Marathe, Achla; Network Dynamics and Simulation Sciences Laboratory, Biocomplexity Institute, Virginia Tech, ;<br>Marathe, Madhav ; Network Dynamics and Simulation Sciences Laboratory, Biocomplexity Institute, Virginia Tech<br>Nordberg, Eric ; Network Dynamics and Simulation Sciences Laboratory, Biocomplexity Institute, Virginia Tech<br>Swarup, Samarth; Network Dynamics and Simulation Sciences Laboratory, Biocomplexity Institute, Virginia Tech<br>Vullikanti, Anil; Network Dynamics and Simulation Sciences Laboratory, Biocomplexity Institute, Virginia Tech<br>Wilson, Mandy ; Network Dynamics and Simulation Sciences Laboratory, Biocomplexity Institute, Virginia Tech |
| <b>Primary Subject Heading</b>: | Global health                                                                                                                                                                                                                                                                                                                                                                                                                                                                                                                                                                                                                                                                                                                                                                                                                                                                                                                                                                                                                                                                                                                                                                                                                                                                   |
| Secondary Subject Heading:      | Epidemiology, Public health, Health informatics, Infectious diseases                                                                                                                                                                                                                                                                                                                                                                                                                                                                                                                                                                                                                                                                                                                                                                                                                                                                                                                                                                                                                                                                                                                                                                                                            |
| Keywords:                       | Delhi, epidemic, interventions, slum population, synthetic social contact network                                                                                                                                                                                                                                                                                                                                                                                                                                                                                                                                                                                                                                                                                                                                                                                                                                                                                                                                                                                                                                                                                                                                                                                               |
|                                 |                                                                                                                                                                                                                                                                                                                                                                                                                                                                                                                                                                                                                                                                                                                                                                                                                                                                                                                                                                                                                                                                                                                                                                                                                                                                                 |

SCHOLARONE™  
Manuscripts

1 Main manuscript  
2  
3  
4  
5

6 **Disparities in Spread and Control of Influenza in Slums of Delhi:**  
7 **Findings From An Agent-Based Modeling Study**  
8

9 A. Adiga, S. Chu, S. Eubank, C. J. Kuhlman, B. Lewis, A. Marathe, M. Marathe, E. K.  
10 Nordberg, S. Swarup, A. Vullikanti and M. L. Wilson  
11

12  
13  
14 Corresponding Author:  
15 Achla Marathe  
16

17  
18 Network Dynamics and Simulation Sciences Laboratory  
19 Biocomplexity Institute  
20 Virginia Tech  
21 1015 Life Science Circle  
22 Blacksburg, VA 24061-0477, USA  
23 [amarathe@vt.edu](mailto:amarathe@vt.edu)  
24

25  
26 (F): 540-231-2891  
27 (P): 540-231-9210  
28

29 Co-authors:  
30 Abhijin Adiga, Shuyu Chu, Stephen Eubank, Chris J Kuhlman, Bryan Lewis, Achla  
31 Marathe, Madhav Marathe, Eric K Nordberg, Samarth Swarup, Anil Vullikanti, Mandy L  
32 Wilson  
33  
34

35 Network Dynamics and Simulation Sciences Laboratory  
36 Biocomplexity Institute  
37 Virginia Tech  
38 1015 Life Science Circle  
39 Blacksburg, VA 24061-0477, USA  
40  
41

42 Keywords: Delhi; epidemic; interventions; slum population; synthetic social contact  
43 network.  
44

45  
46  
47 Word count: 7057  
48  
49  
50  
51  
52  
53  
54  
55  
56  
57  
58  
59  
60



1 Main manuscript  
2  
3

## 4 **ABSTRACT**

5  
6 **Objectives** This research studies the role of slums in the spread and control of  
7 infectious diseases in the National Capital Territory of India, Delhi, using a detailed  
8 social contact network of its residents.

9  
10 **Methods** We use an agent-based model to study the spread of influenza in Delhi  
11 through person-to-person contact. Two different networks are used; one in which slum  
12 and non-slum regions are treated the same and the other in which 298 slum zones are  
13 identified. In the second network, slum-specific demographics and activities are  
14 assigned to the individuals whose homes reside inside these zones. The main effects of  
15 integrating slums is that the network has more home-related contacts due to larger  
16 family sizes and more outside contacts due to more daily activities outside home.  
17 Various vaccination and social distancing interventions are applied to control the spread  
18 of influenza.  
19

20  
21 **Results** Simulation based results show that when slum attributes are ignored, the  
22 effectiveness of vaccination can be overestimated by 30%-55%, in terms of reducing  
23 the peak number of infections and the size of the epidemic, and in delaying the time to  
24 peak infection. The slum population sustains greater infection rates under all  
25 intervention scenarios in the network that treats slums differently. Vaccination strategy  
26 performs better than social distancing strategies in slums.

27  
28 **Conclusions** Unique characteristics of slums play a significant role in the spread of  
29 infectious diseases. Modeling slums and estimating their impact on epidemics will help  
30 policy makers and regulators more accurately prioritize allocation of scarce medical  
31 resources and implement public health policies.

32  
33 **Policy Implications** Currently, over a billion people reside in slums across the world  
34 and this population is expected to double by 2030. This study uses influenza as an  
35 example to demonstrate the need to understand the role of slum populations in the  
36 spread and containment of infectious diseases.  
37

## 38 **Strengths and limitations of this study**

- 39  
40  
41  
42  
43  
44  
45  
46  
47  
48  
49  
50  
51  
52  
53  
54  
55  
56  
57  
58  
59  
60
- We show that the unique attributes of slums must be accounted for in understanding the spread and control of infectious diseases.
  - We demonstrate that the granularity afforded by the agent-based model enables extraction of subpopulations, and subsets of interactions, to help interpret results.
  - This study does not consider age-specific susceptibility or immunity from past infections; all individual persons are assumed to be equally susceptible.
  - The disease transmission risk does not change across activity types, e.g. an hour with an infected person at home or at work carries the same risk.
  - Co-location based contact time is used as a proxy for physical proximity and short-distance environmentally-mediated transmission.

1 Main manuscript  
2  
3  
4

## 5 INTRODUCTION 6

7 Infectious disease is one of the leading causes of human morbidity and mortality  
8 worldwide. Reports from Centers for Disease Control (CDC) show that over 200,000  
9 people in the United States (US) are hospitalized with influenza-like illness (ILI)  
10 symptoms each year, and the mortality on average is over 36,000 annually.[1-2] In  
11 Delhi, India, a joint study by CDC, All India Institute of Medical Sciences, and the  
12 National Institute of Virology has shown that ILI cases are present throughout the year,  
13 although they peak in rainy and winter seasons.[3] It carries a significant economic  
14 burden through reduced productivity and high costs of health care.[4-7] A CDC study  
15 finds that for outpatient and non-medically attended individuals, acute respiratory  
16 infections cost 1%-5% of monthly per capita income in India. In contrast, cost of  
17 inpatient care can be as high as 6%-34% of monthly per capita income.[8] For  
18 developed countries, the annual cost of influenza is estimated to be between \$1-\$6  
19 million per 100,000 people, according to the World Health Organization.[9]  
20  
21  
22

23 In 2007, India established an Integrated Disease Surveillance Program (IDSP), which  
24 included a network of 12 regional laboratories, to minimize the threat of avian influenza  
25 and other highly infectious zoonotic diseases.[10] India faces some unique challenges  
26 in surveillance, prevention and control because of the seasonality of influenza at sub-  
27 regional levels. This seasonal variation depends upon latitude, monsoon season,  
28 humidity and climatic factors of the regions. Acute respiratory infections are estimated to  
29 be 43 million per year, of which 4-12% are due to influenza.[11-12] Chadha et al.[13]  
30 estimated hospitalizations due to respiratory illnesses to be 160 per 10,000 persons in  
31 year 2011, and children under age 5 had the highest incidence of them.  
32  
33  
34

35 Given that influenza is environmentally-mediated and spreads through close proximity,  
36 population density is an important factor in its spread. In India, the average population  
37 density is about 1000 people per square mile; in the slums, it can be 10 to 100 times  
38 higher.[14] Larger household size and crowding make it easier to transmit  
39 infections).[15-18] For example, Baker et al.[16] find that meningococcal disease risk  
40 among children doubles with the addition of 2 adolescents or adults (10 years or older)  
41 to a 6-room house. Other than overcrowding, slums are characterized by their lack of  
42 medical services,[19-20] which makes slum residents highly vulnerable to infectious  
43 diseases. Diseases like cholera, malaria, dengue and HIV are common in slums across  
44 the world.[21-23]  
45  
46  
47

48 This research uses Delhi, the National Capital Territory of India, where 13% of its 13.8  
49 million people live in slum areas, as an example city to study the spread and control of  
50 influenza. Delhi is an interesting case study. It ranks fourth in the world in urban  
51 population, and, among the top 25 largest urban areas, it ranks tenth in population  
52 density. Moreover, the results are likely to be generalizable to other slum areas within  
53 and outside of India.  
54  
55  
56  
57  
58  
59  
60

1 Main manuscript  
2

3 This paper is an extension of the work done in Chen et al.[4], which shows that slum  
4 populations have a significant effect on influenza transmission in urban areas. Ignoring  
5 the influence of slum characteristics underestimates the speed of an outbreak and its  
6 extent. However, Chen et al.[4] do not consider any interventions on the epidemic  
7 spread. *The focus of this research is to study the effect of different intervention  
8 strategies on several subpopulations (slum, age and gender) in two different Delhi  
9 networks, i.e., original (referred to as Network 1) and refined (Network 2).*  
10  
11

12 The original network used in Xia et al.[24] studied the spread and control of influenza in  
13 Delhi using Network 1, which did not take into account the special attributes of the slum  
14 population, such as larger family sizes and different types of daily activity schedules.  
15 Chen et al.[4] used Network 2, the refined social network of Delhi, which accounted for  
16 slum demographics and slum activities, but did not study intervention strategies. In  
17 Network 2, there are 298 slum regions in Delhi, containing about 1.8 million people.  
18  
19

20 The goals of this work focus on understanding the effects of pharmaceutical and non-  
21 pharmaceutical interventions on epidemic outcomes. Pharmaceutical interventions (PI)  
22 include vaccinations, and non-pharmaceutical interventions (NPI) are social distancing  
23 measures such as school closure, quarantine and staying home. These effects are  
24 studied comparatively: (i) in Network 1 versus Network 2, overall and for subpopulations  
25 in each; and (ii) in the slum and non-slum regions of Network 2. Additionally, in a  
26 scenario where interventions can be applied to a limited number of individuals, we  
27 explore how resources should be split between slum and non-slum subpopulations in  
28 order to achieve the best outcomes with respect to total infection rate (i.e., the  
29 cumulative fraction of a population infected).  
30  
31  
32  
33

## 34 METHODS

35 We use an agent-based modeling (ABM) approach to simulate the spread and  
36 containment of influenza in social contact networks of Delhi, India. We compare two  
37 networks: one considers slum-specific attributes, and the other does not. In this  
38 section, we describe the networks, the disease model for each agent, the interventions,  
39 and the heterogeneities of the problem that make ABM uniquely suited to study  
40 epidemics. Throughout this manuscript, each agent in the ABM is an individual human.  
41  
42  
43  
44

45 **Social Contact Networks:** This study uses two synthetic social networks of Delhi,  
46 created in Xia et al.[24] and in Chen et al.[4]. Details on their construction can be found  
47 in Xia et al.[24], Chen et al.[4], Barrett et al.[25], Bisset et al.[26] and references therein.  
48 The synthetic social network by Xia et al.[24] is called *Network 1*, and the more refined  
49 network developed in Chen et al.[4], *Network 2*.  
50

51 Network 1 was developed in part from Land Scan and Census data for Delhi, a daily set  
52 of activities of individuals, and the locations of those activities including geo-locations of  
53 residential areas, shopping centers, and schools, collected through surveys by  
54 MapMyIndia.com. By assigning activity locations to individuals' activities, people are  
55 located at particular times at particular geographic coordinates (including office  
56  
57  
58  
59  
60

1 Main manuscript

2  
3 buildings, schools, etc.) and within particular rooms of buildings. Next, contacts between  
4 individuals are estimated when each person is deemed to have made contact with a  
5 subset of other people simultaneously present at the same location. This gives rise to a  
6 synthetic social contact network where network edges represent these contacts.  
7

8  
9 Network 2 models the slum regions in Delhi and assigns slum-specific attributes to the  
10 individuals whose homes reside in the slum polygons. Slum residents' attributes and  
11 their daily sets of activities are collected through a ground survey in Delhi slums, by a  
12 vendor, Indiamart ([www.Indiamart.com/trips](http://www.Indiamart.com/trips)). The slum polygons are obtained from  
13 *MapMechanic.com*. Individuals living in the slum regions are a part of the slum  
14 population. All other individuals are part of the non-slum population. Network 2 is a geo-  
15 located, and contextualized social contact network of Delhi with slums integrated in it.  
16  
17

18  
19 Following are the main differences between the original network (Network 1) and the  
20 refined network (Network 2). The original social contact network treats the slum regions  
21 like any other region in Delhi in terms of assignment of demographics and individual  
22 activities, i.e. no special consideration is given to slum residents. The refined Network 2  
23 identifies 298 slum polygons (zones) in Delhi and assigns slum-specific demographics  
24 and activities to the individuals whose homes reside inside these polygons. Thus, the  
25 number of individuals is the same in both populations. The slum population constitutes  
26 about 13% (1.8 million) of the entire Delhi population of 13.8 million people. The main  
27 effects of integrating slums is that Network 2 has more home-related contacts due to  
28 larger family sizes and more outside contacts due to more daily activities outside home.  
29 Also, those individuals who reside outside of slum zones have the same activities in  
30 both networks. Overall, there are over 231 million daily interactions between pairs of  
31 individuals. Table S1 compares those two networks as well as data sources for slum  
32 and non-slum Delhi, India. (Table and figure numbers that are prefixed with 'S' are in  
33 the supplementary information (SI)). For example, the average degree increases from  
34 30.4 to 33.4 from Network 1 to Network 2, and the maximum degree increases from 170  
35 to 180. We refer to Chen et al.[4] for more detailed information about the two networks.  
36 Several plots of properties and structural characteristics of Networks 1 and 2 are given  
37 in Chen et al.[27].  
38  
39  
40  
41

42 **Disease Model:** An SEIR, Susceptible (S), Exposed (E), Infectious (I) and Removed or  
43 Recovered (R) model is considered within each individual. Each node in the network  
44 represents an individual, and each edge represents a contact on which the disease can  
45 spread. A contact represents possible transmission between two people that are co-  
46 located for some duration (based on their activity schedules). This is an approximation  
47 to model direct contact and short-distance environmentally-mediated transmission that  
48 might include direct physical contact, fomite mediated, and airborne transmission.[28]  
49  
50

51  
52 We start each epidemic simulation with 20 index cases, randomly chosen. (We find that  
53 results are not sensitive to the number of initial infections.) The detailed description of  
54 the SEIR model as well as the choices of transmissibility value,  $R_0$ , the explicit  
55 incubation and exposed periods can be found in the supplementary information. This  
56 disease model has been used in other works such as Liao et al.[29], Marathe et al.[30].  
57  
58  
59  
60

1  
2  
3  
4  
5  
6  
7  
8  
9  
10  
11  
12  
13  
14  
15  
16  
17  
18  
19  
20  
21  
22  
23  
24  
25  
26  
27  
28  
29  
30  
31  
32  
33  
34  
35  
36  
37  
38  
39  
40  
41  
42  
43  
44  
45  
46  
47  
48  
49  
50  
51  
52  
53  
54  
55  
56  
57  
58  
59  
60

Main manuscript

The transmissibility value for disease transmission is that for the strong influenza model in Chen et al.[4]. That work used mild, strong, and catastrophic influenza models, so we chose the intermediate transmissibility. This corresponds to base attack rates (i.e., cumulative infection fractions) of 0.42 and 0.48, respectively, in Networks 1 and 2. These rates are generally higher than those in some other studies that either compute experimental attack rates from cases or compute them in modeling studies such as this one. Attack rates used by past researchers for different strains of influenza include Asia [0.22 to 0.50],[31] Southeast Asia [0.11 to 0.31 in children [32]; 0.05 to 0.65 [33]], and India [0.111 to 0.235 [34]; 0.074 to 0.424 [35]; 0.045 to 0.294 [36]; 0.008 to 0.100 [37]; 0.209 for various strains [13]]. The results of Chen et al.[4] indicate that the results here, for this particular transmissibility, will be qualitatively the same for other transmissibilities, but will scale down or up as transmissibility changes in the same direction.

**Interventions:** This work considers three vaccination scenarios, i.e., vaccinate when cumulative infection rate is 0% (VAX0, i.e. vaccinate on day 1), 1% (VAX1), and 5% (VAX5). Three classes of social distancing strategies are considered: (i) stay-home (SHO) if infected, i.e. eliminate all non-home related contacts but continue to maintain contacts within the household; (ii) close-schools when cumulative infection rate has reached 1% (CS1) and when it has reached 5% (CS5), i.e. eliminate school related contacts; and (iii) (ISO), in which all contacts, including home contacts, of a person are eliminated when a person becomes infectious. For vaccination, five different compliance rates (10%, 30%, 50%, 70%, 90%) and two different vaccine efficacies (30% and 70%) are considered.

VAX0, SHO, ISO are all fairly aggressive interventions because they are implemented either before a person gets infected or immediately upon becoming infectious. These are actions taken at the individual or family level. For example, vaccination before the influenza season or isolating a sick child at home are family decisions. Even CS1 is an aggressive intervention in the sense that this action is taken by government officials based on aggregate school sickness levels—closing schools before any outbreaks is typically not done. From these starting points, vaccinations when 1% or 5% of the population is infected (VAX1, VAX5), and closing schools when 5% of the population is infected are less aggressive treatments (CS5). The five levels of compliance are also variations on aggressiveness in treatments.

These conditions and parameters are consistent with results from other studies and guidelines put out by international organizations. A meta-study of immunization and slums [38] identifies several vaccination-related studies of slums in India. Unfortunately, these studies are for other diseases such as Hepatitis B, measles, mumps, malaria, and typhoid fever. Nonetheless, slum vaccination rates for children over these ailments range from 25% to 69% for full immunity and from 15% to 55% for partial immunity. Vaccination effectiveness for influenza-like illness (ILI) in India was determined to be about 33% to 36%.[39] In 2012-2013, of 1000 pregnant women in Srinagar India, none were vaccinated against influenza.[40] With regard to school closures, the World Health

1 Main manuscript

2  
3 Organization (WHO) states that school closures may be undertaken proactively (before  
4 an outbreak) or reactively (after influenza starts to spread).[41] WHO recommends that  
5 school closure occur before 1% of the population becomes infected. It also  
6 recommends that people (students and staff) stay home when they feel ill. In another  
7 meta-study[42], it was found that school closure, effected when 0.1% of the population  
8 was infected, was twice as effective in reducing the total attack rate as school closure  
9 occurring after 1% of the population was infected. Moreover, the percentage of people  
10 infected before school closure was triggered varied between 0.02% to 10% across  
11 several studies.  
12  
13

14  
15 When a susceptible node is vaccinated, its probability of getting infected by an  
16 infectious node is scaled down by the efficacy. If it becomes infectious, its probability of  
17 infecting susceptible nodes is also scaled down by the efficacy. In other words, both  
18 incoming and outgoing infection probabilities of vaccinated individuals are reduced by  
19 the vaccine efficacy. Interventions are applied to slum residents, non-slum residents,  
20 and the entire region of Delhi.  
21  
22

23  
24 For each experiment, 25 replicates are simulated for 400 days, and their mean results  
25 are reported. The averages are time-point wise averages, e.g. the mean infection rate at  
26 day 100 is calculated by taking the average of the 25 infection rates that occur on day  
27 100 of each replicate. Table S2 summarizes all the interventions considered, and Table  
28 S3 contains all variables in simulations, including intervention parameters.  
29

30  
31 **Heterogeneities captured:** There are several heterogeneous aspects to this problem  
32 that motivate the use of an ABM approach: (i) the 298 slum zones have populations that  
33 vary by more than four orders of magnitude in size; (ii) the geographic extent of slum  
34 zones differ; (iii) the slum zones are located at irregular spatial intervals throughout  
35 Delhi; (iv) the activity patterns of people living in slums are different from those in the  
36 non-slum region; and (v) each individual interacts with specific others based on co-  
37 location.  
38

39  
40 The implications of these heterogeneities include the following. First, the particular  
41 synthetic households that live within slums are predicated on the number of slum zones,  
42 their locations, and their spatial geometries. These homes have larger family size and  
43 hence more home contacts. Second, slum individuals have different activity patterns  
44 which change the co-located contacts of each slum person: that is, with whom they  
45 interact and for how long. For example, see the supplemental information of Chen et  
46 al.[27]. The average total contact durations by activity type and by slum/non-slum  
47 residents are provided, which show that non-slum people have greater contact  
48 durations for work, school, and college activities, but less for home and other types.  
49 Overall, a slum person has about 50% greater total contact duration per day compared  
50 to a non-slum person. The same supplemental shows that in the age range 20 to 60  
51 years (by year), females that live in slums have more contacts per day than their male  
52 counterparts. However, females whose homes are outside of slum regions have  
53 average number of daily contacts that are below their male counterparts.  
54  
55  
56  
57  
58  
59  
60

1  
2  
3  
4  
5  
6  
7  
8  
9  
10  
11  
12  
13  
14  
15  
16  
17  
18  
19  
20  
21  
22  
23  
24  
25  
26  
27  
28  
29  
30  
31  
32  
33  
34  
35  
36  
37  
38  
39  
40  
41  
42  
43  
44  
45  
46  
47  
48  
49  
50  
51  
52  
53  
54  
55  
56  
57  
58  
59  
60

Main manuscript

## RESULTS AND ANALYSIS

Our results are grouped as follows. (1) Comparison of Network 1 and Network 2 for base case and intervention cases. (2) Results for both networks based on demographic classes, such as slum/non-slum, gender, and age groups, for a wider range of intervention strategies. (3) Comparison of Network 1 with the non-slum population of Network 2. (4) Effects of pharmaceutical and non-pharmaceutical interventions for a wide range of parameter values. (5) Effects of different resource allocation strategies.

All differences are tested with the two-sample t-test and they are all statistically significant with p-values smaller than  $2.2e-16$ . The 95% confidence intervals are given for each comparison. Here is a brief summary of selected results with examples of mechanisms, to provide a high-level overview. Details of results follow this summary and these details matter because there are many factors (inputs) in a simulation whose interactions change results.

(1) Ignoring the unique attributes of slums in a population overestimates the benefits of the interventions. For example, in the case of vaccination intervention (efficacy 30% and compliance 30%), the values for the epidemic size (i.e., cumulative percentage of infected), peak infection rate (i.e., maximum percentage of a population infected on any day), and time to peak are 33.1%, 3.0%, and 184 days, respectively, in Network 2, whereas they are 23.3%, 1.34%, and 286 days in Network 1. In relative terms, the epidemic size and peak infection rate are underestimated by 42.2% and 123.2% respectively, while the time to peak is overestimated by 35.7% in Network 1 (see Figures 1, 2 and Table S4). The larger family sizes for slum families in Network 2 and the increased number of edges result in larger outbreaks and faster time to peak infections.

(2) Interventions are more effective in Network 1 than Network 2 for all types of interventions: vaccination, closing schools, staying home, and isolation. These trends also hold over wide ranges of efficacy and compliance (see Figures 3, 4, S1, S2 and S3). Hence, not accounting for slums gives overly optimistic results for the effectiveness of the interventions. The reduced average family size in Network 1 means fewer within-home edges, which slows infection and reduces spreading. Closing schools and staying home interventions do not affect home edges. However, the magnitude of this effect varies with intervention conditions (e.g., compliance rate, time at which intervention is applied).

(3) Cumulative infection rates by subpopulation in Network 2 show that slums sustain greater infection rates than non-slums under all intervention scenarios, sometimes by as much as 44.0%. See Figure 4 and Table S5 for more details. This is due to the greater household sizes in slums.

(4) For Network 2, under a wide range of intervention compliance rates (10% to 90%), the isolation strategy is up to 32% more effective in containing an outbreak than vaccination (for 30% efficacy). Staying home is up to 18% more effective than

1 Main manuscript

2  
3 vaccination at 50% compliance. See Figure 3 and Table S6 for more details. Isolation,  
4 although hard to implement from practical considerations, is most effective because  
5 edges to susceptible individuals are removed (isolation also provides a good  
6 comparative case). Differences between staying home and vaccination depend on  
7 compliance rates.  
8

9  
10 (5) For Network 2, delay in triggering interventions has 7.3% to 44.0% more adverse  
11 effect in slums than in non-slum regions across compliance rates from 10% to 90%. See  
12 Figure 4 and Table S7 for more details. Early interventions mean actions are taken  
13 when outbreaks are smaller and are therefore more readily contained.  
14

15  
16 (6) Comparison of Network 1 (Figure 3a) with the non-slum population (Figure 4b) of  
17 Network 2 shows that just the presence of slum specific activities and interactions with  
18 non-slum population makes social-distancing based interventions less effective in the  
19 non-slum regions of Network 2.  
20

21  
22 (7) A full-factorial design that splits resources between slum and non-slum regions  
23 indicates that the most effective intervention is to give vaccines to slums and apply  
24 social distancing to non-slums. Applying vaccine and social distancing to slum regions  
25 is the next most effective intervention. See Figure 5. By applying social distancing to  
26 non-slums, these individuals are kept isolated from slum individuals that are infected.  
27 The greatest benefits accrue to the slum populations.  
28  
29

### 30 31 32 **Comparison between Networks 1 and 2: Base case versus interventions**

33  
34 We start with a comparative analysis of the influenza epidemic, with and without  
35 interventions, on Network 1 and Network 2 to measure the impact of integrating slums  
36 in the population on epidemic measures. Figure 1 shows the average simulation time  
37 histories for the base case, and when vaccination is applied randomly to 30% of the  
38 population in each network with vaccine efficacy set at 30%. Mean infection rate is the  
39 daily fraction of infected individuals. It is the time-point wise average over 25  
40 simulations. For example, the mean infection rate at day 100 is calculated by taking the  
41 average of all 25 infection rates. Simulations for other vaccine efficacies and  
42 compliance rates give qualitatively similar results. Two sets of those results are shown  
43 in the supplemental information, see Figures S1 and S2. Note that Network 1 does not  
44 distinguish between slum and non-slum individuals, so the epidemic curve is not split by  
45 subpopulation.  
46  
47

48  
49 Results in Network 2 differ significantly from results in Network 1 for both the base case  
50 and intervention case. In Network 2, the epidemic starts earlier, peaks earlier, has a  
51 larger epidemic size and has higher peaks compared to the corresponding epidemic  
52 quantities in Network 1. Thus, if policy planners ignore slums and use Network 1 to  
53 plan, there will be a false sense of security and lack of urgency to implement  
54 interventions. For both the base case and the intervention case, ignoring unique  
55  
56  
57  
58  
59  
60



1 Main manuscript

2  
3 characteristics of the slums will result in an underestimation of the infections and the  
4 speed of spread.  
5

6  
7 Figure 1 goes here  
8

9  
10 For the intervention cases, the time to peak infection decreases by 35.7%, i.e. from 286  
11 days for Network 1 to 184 days for Network 2, meaning an influenza epidemic would  
12 peak roughly 100 days earlier than one would expect based on the results from Network  
13 1. For the base case, time to peak infection drops by 20.8%, i.e. 34 days reduction for  
14 Network 2 as compared to Network 1.  
15

16  
17 Percentage changes and differences must be viewed cautiously, and to illustrate this  
18 point, we present data for the key parameters in Tables S4 and S8. The difference in  
19 the peak infection rate (i.e., the maximum fraction of daily infected individuals during the  
20 simulation) between Networks 1 and 2 for the base case is 2.2%, or 47.6% in  
21 percentage change (see Table S8). For the intervention case shown in Table S4, the  
22 difference between the two networks is less (1.7%), but the percentage change is more  
23 (123.2%) because the magnitudes of the peak infection rates are reduced when  
24 effective interventions are used. We make note of this here and mainly use the  
25 percentage change values in discussing results. For more detailed comparison between  
26 vaccination intervention and the base case in Network 1 and Network 2, we refer to  
27 Tables S7 and S9 and Figures S4 and S5.  
28  
29  
30  
31

### 32 **Comparison between Networks 1 and 2 based on individual demographic** 33 **information** 34

35  
36 We divide the Delhi population into strata by age, gender, and geographic home  
37 location (i.e., slum and non-slum), and analyze mean cumulative infection rates by  
38 subpopulation for the two networks. In simulations, individuals are chosen at random in  
39 the entire network for vaccination. Various vaccination scenarios are investigated.  
40

41  
42 Figure 2 displays the cumulative infection rate results. On the x-axis, 'Total' refers to the  
43 entire population of Delhi. There are three breakdowns of the entire population. 'Slum'  
44 and 'Non-slum' refer to slum and non-slum regions, respectively. 'Male' and 'Female'  
45 denote the total number of males and females in Delhi, respectively. Four age groups  
46 are considered: 'Preschool' (0-4), 'School' (5-18), 'Adult' (19-64), and 'Senior' (65+). The  
47 black lines correspond to the mean cumulative infection rates for the base case. Other  
48 curves indicate vaccination strategies under different levels of vaccination rate ( $v$ ) and  
49 vaccine efficacy ( $\alpha$ ). Two vaccination rates (30%, 50%) and two vaccine efficacy rates  
50 (30%, 70%) are shown in the figure.  
51  
52

53  
54 For Network 1, vaccination rate of 50% or higher stops the epidemic for all categories of  
55 individuals, regardless of vaccine efficacy. An efficacy of 70% also contains the  
56 epidemic, given a vaccination rate of at least 30%. In comparison, for Network 2, either  
57 a vaccination rate of 70% is required (not shown in plot for clarity) or a vaccination rate  
58  
59  
60

1 Main manuscript

2  
3 of 50% combined with a vaccine efficacy of 70% is required to stop the epidemic for all  
4 categories of individuals.  
5

6  
7 In Network 1, slum and non-slums are treated the same so the infection rates are  
8 identical in Figure 2. However, all scenarios in Network 2 show a higher burden of  
9 disease on the slum population. This is due to the fact that slum households have larger  
10 family size and more contacts on average than households in non-slum areas, see  
11 Chen et al.[27] As shown later, we find similar patterns of infection in slum and non-  
12 slum subpopulations for other interventions such as 'close-schools' and 'stay-home'.  
13

14  
15 The results in both Figure 1 and Figure 2 indicate that ignoring the effect of slums  
16 results in overestimation of the benefits of interventions in terms of reduction in the  
17 mean cumulative infection rate and peak infection rate, as well as the time to peak. This  
18 optimism holds for slum, non-slum and total population under various levels of  
19 vaccination rates and efficacy rates in Network 2. See Table S10 for more detailed  
20 comparison of results between slum and non-slum in Network 2.  
21  
22

23 Figure 2 goes here  
24

## 25 26 **Comparison between Networks 1 and 2 across a wide range of intervention** 27 **strategies** 28

29  
30 Next, we consider a variety of intervention strategies for comparative analysis. We  
31 consider vaccination, school closure, stay home, and isolation strategies. For vaccines,  
32 three different trigger points are considered: when cumulative infection rate reaches 0%  
33 (VAX0), 1% (VAX1) and 5% (VAX5). For close-schools, two trigger points are used:  
34 when the cumulative infection rate reaches 1% (CS1), and 5% (CS5). Under the stay at  
35 home (SHO) strategy, all non-home activities and interactions are eliminated but all  
36 contacts within the household are maintained. Under isolation (ISO) an individual has  
37 no contact with other individuals (even home interactions are eliminated). The stay-at-  
38 home and isolation interventions are implemented for compliant infectious individuals,  
39 after they become infectious, for the entire infectious duration.  
40  
41

42  
43 Figure 3 displays average cumulative infection rates in Network 1 and Network 2 for a  
44 wide range of intervention strategies. For each strategy, five different compliance rates  
45 are considered, i.e., 10%, 30%, 50%, 70% and 90%. The cumulative infection rates  
46 (i.e., fractions) are displayed as larger numbers in boxes, while smaller-font numbers  
47 are the actual number of infected individuals. Darker colors correspond to higher  
48 infection rates. Note that compliance rate is simply the vaccination rate for strategies  
49 VAX0, VAX1 and VAX5. Compliant individuals are selected at random from the entire  
50 population. The 'Base' values do not vary with compliance because the base case has  
51 no intervention. Note that all heat maps in this paper use the same color scheme so that  
52 colors can be compared across figures.  
53  
54

55  
56 Since Network 1 does not distinguish between slum and non-slum populations, we only  
57 compare the two networks for the whole of Delhi. The general pattern is similar for both  
58  
59  
60

1 Main manuscript  
2  
3

4 networks. However, all interventions have a larger effect on Network 1 under the same  
5 compliance rate (that is, corresponding numbers are uniformly lower for Network 1 than  
6 for Network 2). The infection rates drop to zero at a smaller compliance rate for VAX0,  
7 stay-home, and isolation strategies in Network 1 as compared to those for Network 2.  
8

9 Figure 3 goes here  
10

11  
12 At a high level, among all intervention strategies, early vaccination (VAX0 and VAX1),  
13 social isolation (ISO), and stay home (SHO) are more effective than the other  
14 strategies, and this is more readily observed at higher compliance rates. For these  
15 more effective strategies, the interventions per person are implemented right after (or  
16 very shortly after) the person is infected. For example, SHO is implemented  
17 immediately after a person becomes infectious. Thus, a person that becomes infectious  
18 can infect their family members, but if these other members become infectious, then  
19 they, too, will be confined to home. Thus, home-bound people can infect their family  
20 members, but no one beyond their family (for 100% compliance). As compliance rate  
21 increases, this effect approaches, roughly, a “family-based” isolation intervention  
22 (similar to ISO), consistent with the results in Figure 3 and in subsequent results.  
23  
24  
25  
26  
27  
28

### 29 **Effect of vaccination versus social distancing on slum and non-slum** 30 **subpopulations** 31

32 We now compare the impact of vaccination and social distancing on slum and non-slum  
33 subpopulations from Network 2. Social distancing interventions are close-schools, stay-  
34 home, and isolation.  
35

36  
37 The mean cumulative infection rates (and actual numbers of infections underneath) for  
38 each compliance level are shown in the heat maps in Figure 4 for slum and non-slum  
39 populations in Network 2. The axis labels are identical to those in Figure 3, as is the  
40 color scheme of the cells. The base case values are constant since there is no  
41 intervention and hence no compliance. Darker colors correspond to higher infection  
42 rates.  
43  
44

45 Compared to the base case, all interventions reduce infection rates to some extent. As  
46 the compliance rate increases, infection rates drop for all interventions. Infection rates  
47 drop to zero in slum and non-slum regions at a compliance level of 70% or higher,  
48 under SHO, ISO, and VAX0 strategies. Early interventions or lower trigger levels reduce  
49 the infection rates significantly, and this effect increases with compliance rate.  
50  
51

52 The following observations can be made from Figure 4. Social distancing, i.e. SHO, at  
53 low and intermediate compliance and CS at all compliance levels, are less effective in  
54 slum regions as compared to non-slum regions. This is because CS only eliminates  
55 school interactions for those attending school, and there are fewer school edges in  
56 slums compared to non-slum areas, as shown in Figure S6. The effectiveness of CS in  
57  
58  
59  
60

Main manuscript

1  
2  
3 slums is mitigated by the greater average number and duration of interactions at home  
4 in slums as compared to non-slums (see Figure S6 and Chen et al.[27]). Thus, if a  
5 person is sick, there is a greater chance of transmitting contagion to family members,  
6 who then may have activities outside of school, thus circumventing the CS intervention.  
7 At high compliance, SHO is effective because all interactions outside home (including  
8 school) are eliminated.[27]  
9  
10

11  
12 These observations are also supported by Figure S7, which contains numbers of edges  
13 used to transmit contagion for a base-case run of Figure 1. There are several effects  
14 that bear on the above observations. First, in the cases of activities “work”, “other”, and  
15 “school”, the number of edges transmitting contagion from slums to non-slums is greater  
16 than the reverse: from non-slum to slum. Second, in two of these three activity  
17 categories, there is more slum to non-slum transmissions than slum to slum  
18 transmissions. Edges of transmission for slum dwellers is dominated by home  
19 interactions. The infected homes in slums serve as launching points to drive disease to  
20 non-slums through slum to non-slum interactions. (There are no “mixed” edges at  
21 homes, and shopping and college activities have low levels of slum activity because of  
22 socio-economic factors.) We will see the effects of these mechanisms in Figure 5, but  
23 we now return to Figure 4.  
24  
25  
26

27 Isolation works well at 30% or higher compliance rates, but it is a much harder strategy  
28 to implement, especially in slums. However, it is considered here for comparative  
29 analysis. Vaccination also produces marked decreases in cumulative outbreak sizes as  
30 compliance increases. However, close-school is generally less effective because this  
31 intervention removes only a fraction of interactions for a fraction of the population, i.e.  
32 school aged children. Simulations were also run for 70% vaccine efficacy. Since results  
33 are qualitatively similar for those parameters, these plots are provided in Figure S3.  
34  
35  
36

37 Figure 4 goes here  
38

## 39 **Comparison between Network 1 and non-slum areas of Network 2**

40  
41 Note that Network 1 treats all parts of the region as non-slum, i.e. all individuals follow  
42 non-slum activities and demographics. In order to capture the additional disease risk to  
43 the non-slum population that arises from the interactions with the slum population, we  
44 compare Network 1 in Figure 3a with the non-slum population of Network 2 in Figure 4b.  
45 In base case, the additional disease risk to the non-slum population goes up from 42%  
46 to 45%. However, the beneficial effects of social distancing strategies drop by a large  
47 amount, e.g. close school strategies are 5-20% less effective in the non-slum areas of  
48 Network 2. This effect changes non-linearly with the compliance rate. As compliance  
49 rate goes up, the difference between performance of Network 1 and non-slum parts of  
50 Network 2 goes up in CS1 and CS5. This implies that in Network 2, non-slum population  
51 requires much higher levels of compliance to achieve the same results as in Network 1.  
52 This difference is less stark for vaccination based interventions, i.e. VAX0, VAX1 and  
53 VAX5. This is expected since the effect of vaccination is less dependent on interactions;  
54 it is only through herd immunity that interactions come into play.  
55  
56  
57  
58  
59  
60

1  
2  
3  
4  
5  
6  
7  
8  
9  
10  
11  
12  
13  
14  
15  
16  
17  
18  
19  
20  
21  
22  
23  
24  
25  
26  
27  
28  
29  
30  
31  
32  
33  
34  
35  
36  
37  
38  
39  
40  
41  
42  
43  
44  
45  
46  
47  
48  
49  
50  
51  
52  
53  
54  
55  
56  
57  
58  
59  
60

Main manuscript

## Constrained resource allocation among slum and non-slum areas

We consider a specific scenario under Network 2. If only a limited number of vaccines are available, and only a certain fraction of individuals can be kept home during an epidemic, how should these interventions be applied to the slum and non-slum regions so that the epidemic can be controlled effectively? Given that slum residents' attributes differ from those of non-slum residents, is there a strategy that works better in slums than in non-slum areas? The total population in Delhi is about 13.8 million, which includes about 1.8 million slum residents. We assume that only 10% of the total population can be covered by interventions, half through vaccination and the other half through stay home. Enough vaccines are available to cover 5% of the total population (i.e. 692,183 vaccinated, corresponding to about 38.25% of slum or 5.75% of non-slum population), and 5% of the individuals can stay home (692,183 individuals; this is applied to only the infected individuals). Note that an individual may receive a vaccine and also stay at home if this individual, in spite of being vaccinated, gets infected.

We consider 4 different ways of applying interventions to 10% of the total population: (i) apply both interventions to slums, i.e. give all vaccines to slums and apply SHO only in the slums (VsSs); (ii) apply all interventions to non-slum areas (VnSn); (iii) give vaccines to slums and SHO to non-slums (VsSn) and (iv) give vaccines to non-slums and apply SHO to slums (VnSs).

For both types of intervention, the same number of individuals is chosen randomly from slum or non-slum areas. 10% of the total Delhi population amounts to 76.5% of slum population, 11.5% of the non-slum population, or a combination of 38.25% of the slum and 5.75% of the non-slum population (i.e. half from slums and half from non-slums). Figure 5 shows the mean cumulative infection rates, as well as the number of infected from the entire population of Delhi, the slums, and non-slum areas under each of the four scenarios. The first 3 columns refer to Network 2 and the last column shows results for Network 1. Since Network 1 does not distinguish between slum and non-slum areas, the infection rates in each subpopulation remain the same as for the total population.

Comparison of the last two columns in Figure 5 indicates that the non-slum population in Network 2 faces 3-5% additional disease risk compared to Network 1 in all cases. This is primarily driven by the increased interactions within slum populations and between slum and non-slum populations in Network 2.

In Figure 5, all four intervention strategies produce essentially the same total attack rates (around 43% to 44%), a drop of 4% to 5% over the base case. The dominant effect on Network 2, is the benefits that primarily accrue to the slum population for the VsSs and VsSn strategies because they drive down the fraction of infected slum residents from 0.74 to 0.55 or 0.58. Also, as described in the context of Figures 4 and S6 above, social distancing of the non-slum residents helps to isolate them from the infected slum residents. Results such as these may be helpful to policy makers in breaking the poverty trap in economically poor regions.[43]

1 Main manuscript  
2  
3  
4

5 Also, the strategy of vaccinating non-slums and social distancing slums (VnSs) is not as  
6 effective as the interventions in rows 1 and 2 of Figure 5. This is a counterintuitive  
7 result, since the density of population is much higher in the slums, which may lead to  
8 the belief that social distancing in slums will break up the dense clusters. However, a  
9 careful examination shows that keeping slum residents home is not an effective social  
10 distancing strategy because their family size is, on average, almost 3 times the family  
11 size of non-slum households.[27] The high level of mixing at home makes social  
12 distancing ineffective in slums unless the infected individual is completely isolated.  
13 However, complete isolation is not viable in slum areas where the entire household may  
14 live in a single room.  
15  
16  
17  
18  
19

20 Figure 5 goes here  
21  
22

## 23 DISCUSSION 24

25 With slum populations expected to grow to 2 billion by 2030,[44] it is becoming  
26 increasingly urgent to understand how to control the spread of infectious diseases in  
27 slum areas and measure its effect on urban populations. To our knowledge, a detailed  
28 study of interventions to control influenza epidemics in slums, using an agent-based  
29 simulation model, has never been done before. Slum conditions are important for a city  
30 beyond the direct effects of disease transmission. For example, civil wars may be  
31 precipitated or exacerbated by disease outbreaks because they decrease social health  
32 and welfare.[45]  
33  
34  
35

36 Even though slum regions contain only 13% of the total population of Delhi, Chen et  
37 al.[4] show that omitting their attributes leads to underestimation of the overall infection  
38 rate and the peak infection rate of the epidemic. This paper extends that work by  
39 evaluating the differential impact of interventions on slum and non-slum regions.  
40 Various vaccination and social distancing strategies are analyzed under different  
41 scenarios that show that the slum population is more prone to infections under the same  
42 control measures. Furthermore, taking account of slum populations significantly alters  
43 the disease dynamics in the *entire* population. Differences in key measures are  
44 demonstrated between the cases of accounting for slum populations and not: e.g., a  
45 100% increase in the peak attack rate in some cases when slum regions' characteristics  
46 are taken into account, compared to the case when they are ignored.  
47  
48  
49

50 Figure 4, which compares infections in slum with non-slum areas, shows that at very  
51 high compliance rates, some interventions can be equally effective in both slums and  
52 non-slums. However, such high compliance rates are typically not feasible due to  
53 practical realities on the ground, and also because they require timely diagnosis of  
54 infected cases. For SHO to be effective, the coverage rate needs to be 70% or more in  
55 both slums and non-slums, and the diagnosis of the infected individuals needs to be  
56 correct and immediate. In other words, effective control of a contagious epidemic in a  
57  
58  
59  
60

1 Main manuscript  
2

3 high-density place like Delhi, would require either early and drastic action (e.g. ISO) or a  
4 highly compliant set of individuals, or a combination of these features.  
5

6  
7 This work overall demonstrates the power of agent-based and population modeling to  
8 evaluate complicated interaction-based epidemiological phenomena. Clearly, there are  
9 limitations to this work (several are itemized below). But these agent and population  
10 approaches provide a platform for adding additional complexity. All of the figures  
11 demonstrate that quantitative results depend on complicated interplay among inputs.  
12 These results are important because they inform policy decisions. An equally important  
13 benefit of this type of work, but not often stated, is developing intuition about epidemic  
14 dynamics (in this case, with the effects of slums), to enable decision makers to reason  
15 about nuanced interactions among effects to a degree that is hard to obtain with other  
16 approaches that lack this level of detail. However, we believe that other modeling  
17 approaches may also be valuable in understanding epidemic dynamics in slum  
18 populations.  
19  
20  
21

22 Despite the detailed modeling effort, there are limitations of this work and areas for  
23 improvement in the future. For example: (1) Examination of different population level  
24 base attack rates derived from different transmission probabilities. (2) Different  
25 susceptibilities and infectivity for individual agents; e.g., based on age. (3) Effects of  
26 asymptomatic infections (although we have addressed this to some extent with  
27 compliance and efficacy of interventions). (4) Seasonal effects.[46-47] (5) Effects of  
28 immunity for an individual from previous infections (in previous seasons). (6) Evaluation  
29 of interaction of different strains from season to season. (7) Comparison of tropical  
30 versus subtropical factors. (8) Evaluation of a specific outbreak scenario. (9) Impact of  
31 sickness on absenteeism from work and its economic ramifications. (10) Effects on rural  
32 versus urban populations. (11) Using combinations of interventions rather than one at a  
33 time; this was only done here in Figure 5. However, to disambiguate results, it is  
34 prudent to first examine individual interventions. (12) Effect of changing disease  
35 transmission rate for different activity types. (13) Effect of changing contact times at  
36 different locations. (14) To capture close-proximity transmission, one could use actual  
37 physical proximity. Here, we use colocation. Finally, just as changes in modeling details  
38 can change model results, so, too, changes in the conditions in actual outbreaks can  
39 change results; some of these factors are listed above. It is essentially impossible to  
40 capture all of these effects—many of which are unknown—down to the level of  
41 individual humans.  
42  
43  
44  
45  
46

47 Public health implications: This research demonstrates that modeling slum populations  
48 is important, not only for understanding disease dynamics, but also for designing  
49 effective control measures. Ignoring the influence of slum characteristics on their urban  
50 environment will significantly underestimate the speed of an outbreak and its extent,  
51 and hence will lead to misguided interventions by public health officials and policy  
52 planners. Lessons from this research can be applied in the field and observations  
53 collected from the field can provide valuable data to improve the models and validate  
54 the results. For example, our results show that a slum resident has about 50% greater  
55 total contact duration per day compared to a non-slum resident. This makes social  
56  
57  
58  
59  
60

## Main manuscript

1  
2  
3 distancing based interventions more taxing in the slum population. Public health policy  
4 makers may want to subsidize pharmaceutical resources for the slum population to  
5 make them more affordable. Similarly, we find women in slums have a higher number of  
6 contacts per day than their male counterparts whereas in non-slum regions, women  
7 have a fewer number of daily contacts than their male counterparts. This kind of  
8 information can be used to prioritize the distribution of limited resources, e.g. women  
9 could be given preference over males for vaccination in slum areas. This research  
10 provides simulation-based evidence that in general social distancing strategies are  
11 ineffective in slums because of a large number of contacts at home. Unless one applies  
12 complete isolation, which is not feasible in slums, just staying at home still keeps a large  
13 number of contacts and pathways of spread intact.  
14  
15  
16  
17  
18  
19  
20  
21  
22  
23  
24  
25  
26  
27  
28  
29  
30  
31  
32  
33  
34  
35  
36  
37  
38  
39  
40  
41  
42  
43  
44  
45  
46  
47  
48  
49  
50  
51  
52  
53  
54  
55  
56  
57  
58  
59  
60



1 Main manuscript  
2  
3

4 **Contributorship statement**

5 AA, SE, CJK, AM, MM, SS, AV designed and conceived the study. SC carried out the  
6 experiments and simulations. SC, CJK, AM performed data analysis. CJK, BL, AM, MM,  
7 EKN, MLW helped with reviewing the results and writing the paper.  
8  
9

10  
11  
12 **Competing Interests**

13 There are no competing interests.  
14  
15

16  
17  
18 **Funding statement**

19 This work has been partially supported by the Defense Threat Reduction Agency  
20 (DTRA) (grant no. HDTRA1-11-1-0016 and HDTRA1-11-D-0016-0001), National  
21 Institutes of Health (NIH) (grant no. 1R01GM109718) and National Science Foundation  
22 (NSF) (grant no. CCF-1216000, CNS-1011769, and NRT-DESE-154362) (NSF) (grant  
23 no. CCF-1216000, CNS-1011769, and NRT-DESE-154362), NIH Models of Infectious  
24 Disease Agent Study (MIDAS) (grant no. 2U01GM070694-11 and 3U01FM070694-  
25 09S1).  
26  
27

28  
29  
30 **Data Sharing Statement**

31 Data pertaining to figures and statistical analysis are partially provided in the  
32 supplementary file, and also can be obtained by contacting the corresponding author  
33 through email.  
34  
35  
36  
37  
38  
39  
40  
41  
42  
43  
44  
45  
46  
47  
48  
49  
50  
51  
52  
53  
54  
55  
56  
57  
58  
59  
60

1 Main manuscript  
2  
3

4 **REFERENCES**  
5

- 6 1. Thompson WW, Shay DK, Weintraub E, Brammer L, Cox N, Anderson LJ,  
7 Fukuda K. Mortality associated with influenza and respiratory syncytial virus in  
8 the United States. *JAMA* 2003 Jan 8;289(2):179-186.  
9  
10 2. Thompson WW, Shay DK, Weintraub E, Brammer L, Bridges CB, Cox NJ,  
11 Fukuda K. Influenza-associated hospitalizations in the United States. *JAMA* 2004  
12 Sep 15;292(11):1333-1340.  
13  
14 3. Chandra N. Influenza viruses circulate in Delhi throughout the year. March 2012.  
15 [http://indiatoday.intoday.in/story/influenza-viruses-circulate-in-delhi-throughout-](http://indiatoday.intoday.in/story/influenza-viruses-circulate-in-delhi-throughout-the-year/1/179252.html)  
16 [the-year/1/179252.html](http://indiatoday.intoday.in/story/influenza-viruses-circulate-in-delhi-throughout-the-year/1/179252.html)  
17  
18 4. Chen J, Chu S, Chungbaek Y, Khan M, Kuhlman C, Marathe A, Mortveit H,  
19 Vullikanti A, Xie D. Effect of modelling slum populations on influenza spread in  
20 Delhi. *BMJ Open* 2016a Sep 1;6(9):e011699.  
21  
22 5. Barrett C, Bisset K, Leidig J, Marathe A, Marathe M. Economic and social impact  
23 of influenza mitigation strategies by demographic class. *Epidemics* 2011 Mar  
24 31;3(1):19-31.  
25  
26 6. Liao S, Ma Y, Chen J, Marathe A. Paid Sick-Leave: Is It a Good Way to Control  
27 Epidemics? International Conference on Complex Sciences 2012 Dec 5 (pp.  
28 213-227). Springer International Publishing.  
29  
30 7. Dorratoltaj N, Marathe A, Lewis B, Swarup S, Eubank S, Abbas K. Cost-benefit  
31 Analysis of Vaccine-based Interventions to Control Pandemic Influenza. 3rd  
32 Conference on Modeling of Infectious Diseases. Institute of Mathematical  
33 Sciences, Chennai, India, November 2015.  
34  
35 8. Peasah SK, Purakayastha DR, Koul PA, Dawood FS, Saha S, Amarchand R,  
36 Broor S, Rastogi V, Assad R, Kaul KA, Widdowson MA, Lal RB, Krishnan A. The  
37 cost of acute respiratory infections in Northern India: a multi-site study. *BMC*  
38 *Public Health* 2015; 15: 330. Published online 2015 April 7.  
39  
40 9. WHO. Influenza vaccines. WHO position paper. *Weekly Epidemiol Record* 2005;  
41 80(33):279-87.  
42  
43 10. Integrated Disease Surveillance Program, Influenza Surveillance Lab Network.  
44 URL: <http://idsp.nic.in/index1.php?lang=1&level=1&sublinkid=5789&lid=3722>  
45  
46 11. Broor S, Krishnan A, Roy DS, Dhakad S, Kaushik S, Mir MA, Singh Y, Moen A,  
47 Chadha M, Mishra AC, Lal RB. Dynamic patterns of circulating seasonal and  
48 pandemic A(H1N1)pdm09 influenza viruses from 2007–2010 in and around  
49 Delhi, India. *PLoS ONE* 2012 Jan 2;7(1):e29129.  
50  
51  
52  
53  
54  
55  
56  
57  
58  
59  
60

## Main manuscript

12. Chadha MS, Broor S, Gunasekaran P, Potdar VA, Krishnan A, Chawla - Sarkar M, Biswas D, Abraham AM, Jalgaonkar SV, Kaur H, Klimov A. Multisite virological influenza surveillance in India: 2004–2008. *Influenza and other respiratory viruses* 2012 May 1;6(3):196-203.
13. Chadha MS, Hirve S, Dawood FS, Lele P, Deoshatwar A, Sambhudas S, Juvekar S, LaFond KE, Mott JA, Lal RB, Mishra AC. Burden of seasonal and pandemic influenza-associated hospitalization during and after 2009 A (H1N1) pdm09 pandemic in a rural community in India. *PloS ONE* 2013 May 15;8(5):e55918.
14. Nijman J. A study of space in Mumbai's slums. *Tijdschrift voor Economische en Sociale Geografie* 2010 Feb 1;101(1): 4-17.
15. Lofgren E, Fefferman NH, Naumov YN, Gorski J, Naumova EN. Influenza seasonality: underlying causes and modeling theories. *Journal of Virology* 2007 Jun 1;81(11):5429-36.
16. Baker M, McNicholas A, Garrett N, Jones N, Stewart J, Koberstein V, Lennon D. Household crowding a major risk factor for epidemic meningococcal disease in Auckland children. *The Pediatric Infectious Disease Journal* 2000 Oct 1;19(10):983-90.
17. Burström B, Diderichsen F, Smedman L. Child mortality in Stockholm during 1885–1910: the impact of household size and number of children in the family on the risk of death from measles. *American Journal of Epidemiology* 1999 Jun 15;149(12):1134-41.
18. Souza LS, Ramos EA, Carvalho FM, Guedes VM, Souza LS, Rocha CM, Soares AB, Velloso LD, Macedo IS, Moura FE, Siqueira M. Viral respiratory infections in young children attending day care in urban Northeast Brazil. *Pediatric Pulmonology* 2003 Mar 1;35(3):184-191.
19. Gulyani S, Bassett EM, Talukdar D. A tale of two cities: A multi-dimensional portrait of poverty and living conditions in the slums of Dakar and Nairobi. *Habitat International* 2014 Jul 31;43:98-107.
20. Acolin A, Chattaraj S, Wachter SM. Urban Governance and Development of Informality in China and India. Informal Real Estate Markets, Eugenie Birch, Shahana Chattaraj and Susan Wachter, eds, University of Pennsylvania Press, Forthcoming. 2014 Aug 18.
21. Madise NJ, Ziraba AK, Inungu J, Khamadi SA, Ezeh A, Zulu EM, Kebaso J, Okoth V, Mwau M. Are slum dwellers at heightened risk of HIV infection than other urban residents? Evidence from population-based HIV prevalence surveys in Kenya. *Health Place* 2012 Sep 30;18(5):1144-1152.

## Main manuscript

- 1  
2  
3  
4  
5  
6  
7  
8  
9  
10  
11  
12  
13  
14  
15  
16  
17  
18  
19  
20  
21  
22  
23  
24  
25  
26  
27  
28  
29  
30  
31  
32  
33  
34  
35  
36  
37  
38  
39  
40  
41  
42  
43  
44  
45  
46  
47  
48  
49  
50  
51  
52  
53  
54  
55  
56  
57  
58  
59  
60
22. Nossiter A. Cholera Epidemic Envelops Coastal Slums in West Africa. *New York Times*. Aug 22, 2012.
23. Desai VK, Kapadia SJ, Kumar P, Nirupam S. Study of measles incidence and vaccination coverage in slums of Surat city. *Indian J Community Med* 2003 Jan 1; 28(10).
24. Xia H, Nagaraj K, Chen J, Marathe MV. Synthesis of a high resolution social contact network for Delhi with application to pandemic planning. *Artif Intell Med* 2015; 65(2): 113-130.
25. Barrett CL, Beckman RJ, Khan M, Anil Kumar VS, Marathe MV, Stretz PE, Dutta T, Lewis B. Generation and analysis of large synthetic social contact networks. In Winter Simulation Conference 2009 Dec 13 (pp. 1003-1014). Winter Simulation Conference.
26. Bissett K, Cadena J, Khan M, Kuhlman CJ, Lewis B, Telionis PA. An integrated agent-based approach for modeling disease spread in large populations to support health informatics. In 2016 IEEE-EMBS International Conference on Biomedical and Health Informatics (BHI) 2016 Feb 24 (pp. 629-632). IEEE.
27. Chen J, Chu S, Chungbaek Y, Khan M, Kuhlman C, Marathe A, Mortveit H, Vullikanti A, Xie D. Supplemental Information for Effect of Modelling Slum Populations on Influenza Spread in Delhi. *BMJ Open* 2016b Sep 1;6(9):e011699. Available at: <http://bmjopen.bmj.com/content/6/9/e011699/DC1/embed/inline-supplementary-material-1.pdf>
28. Koopman, J.S. (2004). Modeling infection transmission. Annual Review of Public Health 303-326.
29. Liao S, Ma Y, Chen J, Marathe A. Paid Sick-Leave: Is It a Good Way to Control Epidemics? International Conference on Complex Sciences: Theory and Applications, December 57, Santa Fe, New Mexico. Springer series Lecture Notes of the Institute for Computer Sciences, Social Informatics and Telecommunications Engineering. Edited by Glass, Kristin and Colbaugh, Richard and Ormerod, Paul and Tsao, Je\_rey. Complex Sciences: Springer, vol. 12 pp 213-227.
30. Marathe A, Lewis B, Chen J, Eubank S. Sensitivity of household transmission to household contact structure and size. *PLoS ONE* 2011 Aug 1;6(8):e22461.
31. Kaji M, Watanabe A, Aizawa H. Differences in clinical features between Influenza A H1N1, A H3N2, and B in adult patients. *Respirology* 2003;8:231–233.

## Main manuscript

- 1  
2  
3  
4  
5  
6  
7  
8  
9  
10  
11  
12  
13  
14  
15  
16  
17  
18  
19  
20  
21  
22  
23  
24  
25  
26  
27  
28  
29  
30  
31  
32  
33  
34  
35  
36  
37  
38  
39  
40  
41  
42  
43  
44  
45  
46  
47  
48  
49  
50  
51  
52  
53  
54  
55  
56  
57  
58  
59  
60
32. Meeyai A, Praditsitthikorn N, Kotirum S, Kulpeng W, Putthasri W, Cooper BS, Teerawattananon Y. Seasonal influenza vaccination for children in Thailand: a cost-effectiveness analysis. *PLoS Med* 2015 May 26;12(5):e1001829.
33. Longini IM, Nizam A, Xu S, Ungchusak K, Hanshaoworakul W, Cummings DA, Halloran ME. Containing pandemic influenza at the source. *Science* 2005 Aug 12;309(5737):1083-1087.
34. Choudhry A, Singh S, Khare S, Rai A, Rawat DS, Aggarwal RK, Chauhan LS. Emergence of pandemic 2009 influenza A H1N1, India. *Indian J Med Res* 2012 Apr 1;135(4):534-537.
35. Gurav YK, Pawar SD, Chadha MS, Potdar VA, Deshpande AS, Koratkar SS, Hosmani AH, Mishra AC. Pandemic influenza A(H1N1) 2009 outbreak in a residential school at Panchgani, Maharashtra, India. *Indian J Med Res* 2010;132:67-71.
36. Broor S, Gupta S, Mohapatra S, Kaushik S, Mir MA, Jain P, Dar L, Lal RB. Emergence of 2009A/H1N1 cases in a tertiary care hospital in New Delhi, India. *Influenza and other respiratory viruses* 2011 Nov 1;5(6):e552-557.
37. Ramamurthy N, Pillai LC, Gunasekaran P, Elango V. Influenza activity among the paediatric age group in Chennai. *Indian J Med Res* 2005 Jun 1;121(6):776-779.
38. Crocker-Buque T, Mindra G, Duncan R, Mounier-Jack S. Immunization, Urbanization and Slums—A Systematic Review of Factors and Interventions. *BMC Public Health* 2017; 17(556):1-16.
39. Vashishtha VM, Kalra A, Choudhury P. Influenza Vaccination in India: Position Paper of Indian Academy of Pediatrics. *Indian Pediatrics* 2013; 50: 867-874.
40. Koul PA, Bali NK, Ali S, Ahmad SJ, Bhat MA, Mir H, Akram S, Khan UH. Poor Uptake of Influenza Vaccination in Pregnancy in Northern India. *Journal of Gynecology and Obstetrics*. 2014; 127:234-237.
41. World Health Organization. Measures in School Settings. Pandemic (H1N1) 2009 Briefing note 10. 2009. ([http://www.who.int/csr/disease/swineflu/notes/h1n1\\_school\\_measures\\_20090911/en/](http://www.who.int/csr/disease/swineflu/notes/h1n1_school_measures_20090911/en/)).
42. Jackson C, Mangtani P, Hawker J, Olowokure B, Vynnycky E. The Effects of School Closures on Influenza Outbreaks and Pandemics: Systematic Review of Simulation Studies. *PLoS ONE* 2014; 9:e97297.

## Main manuscript

- 1  
2  
3  
4  
5  
6  
7  
8  
9  
10  
11  
12  
13  
14  
15  
16  
17  
18  
19  
20  
21  
22  
23  
24  
25  
26  
27  
28  
29  
30  
31  
32  
33  
34  
35  
36  
37  
38  
39  
40  
41  
42  
43  
44  
45  
46  
47  
48  
49  
50  
51  
52  
53  
54  
55  
56  
57  
58  
59  
60
43. Bonds MH, Keenan DC, Rohani P, Sachs JD. Poverty Trap Formed by the Ecology of Infectious Diseases. *Proceedings of the Royal Society B* 2010 Apr 22; 277(1685):1185-1192.
44. Un-Habitat. The challenge of slums: global report on human settlements 2003. *Management of Environmental Quality: An International Journal* 2004 Jun 1; 15(3): 337-338.
45. Letendre K, Fincher CL, Thornhill R. Does infectious disease cause global variation in the frequency of intrastate armed conflict and civil war? *Biological Reviews* 2010 Aug 1;85(3):669-683.
46. Koul PA, Broor S, Saha S, Barnes J, Smith C, Shaw M, Chadha M, Lal RB. Differences in Influenza Seasonality by Latitude, Northern India. *Emerging Infectious Diseases* 2014 Oct;20(10), 1723-1726.
47. Hirve S, Newman LP, Paget J, Azziz-Baumgartner E, Fitzner J, Bhat N, Vandemaele K, Zhang W. Influenza Seasonality in the Tropics and Subtropics—When to Vaccinate? *PloS ONE* 2016 Apr 27;11(4):e0153003.

Main manuscript

**FIGURE 1:** Epidemic curves for base case and vaccination case. Each time point in the curve is an average over 25 replicates. The vaccines are given randomly to 30% of the entire population and the vaccine efficacy is 30%. For Network 2, epidemic curves are shown for total population and slum and non-slum subpopulations. 'Intervene Total' refers to the epidemic curve of the entire Delhi population when the vaccine intervention is applied. 'Intervene Slum' refers to the epidemic curve for just the slum population, and 'Intervene Non-slum' refers to the epidemic curve for just the non-slum population for the intervention case. Epidemic curves for a variety of compliances and efficacies are reported in Figures S1 and S2.

**FIGURE 2:** Mean cumulative infection rates for different subgroups in the two networks. Two vaccination rates ( $v = 30\%$ ,  $50\%$ ) and two vaccine efficacy rates ( $\alpha = 30\%$ ,  $70\%$ ) are considered. Individuals are chosen at random in the entire network for vaccination on day 0. Mean infection rates are calculated within each group. The last several lines in the plot for Network 1 are overlapping at the bottom because the mean infection rates are almost zero under those scenarios. 'Total' refers to the entire population of Delhi. 'Slum' and 'Non-slum' refer to slum and non-slum regions, respectively. 'Male' and 'Female' denote the total number of males and females in Delhi, respectively. Age groups are denoted by 'Preschool', 'School', 'Adult', and 'Senior'.

(a) Total Delhi Network 1      (b) Total Delhi Network 2

**Figure 3.** Mean cumulative infection rates under different interventions for Network 1 and Network 2. The larger font numbers are fractions of populations that are infected and the smaller font numbers are counts of infected individuals. Colors of the boxes correspond to the values of the large numbers (i.e., fractions of infected), and the same scheme is used for both plots for comparisons—and for all plots in this paper. Five different compliance rates are examined (10%, 30%, 50%, 70% and 90%), and 4 types of intervention strategies (vaccination (VAX), close-schools (CS), stay-home (SHO) and isolation (ISO)) are considered. For vaccines, three different trigger points are considered: when the cumulative infection rate reaches 0% (VAX0), 1% (VAX1) and 5% (VAX5) of the total population. The vaccine efficacy is set at 30%. For close-schools, two trigger points are used: when cumulative infection rate reaches 1% (CS1) and 5% (CS5). Compliant individuals are selected at random from the entire Delhi population, and the cumulative infection rates are calculated for each network.

(a) Slum      (b) Non-slum

**Figure 4.** Heat map of cumulative infection rates in slum and non-slum regions of Network 2 under different intervention strategies. The colors of boxes correspond to the larger numbers in the boxes—the cumulative infection rates—and the two plots use the same scheme for comparisons. Darker colors correspond to higher infection rates. The smaller font numbers are counts of infected individuals. The vaccination efficacy is fixed at 30%. Five different compliance rates (10%, 30%, 50%, 70% and 90%) and 4 types of

Main manuscript

1  
2  
3 intervention strategies (vaccination (VAX), close-schools (CS), stay-home (SHO) and  
4 isolation (ISO)) are considered. For vaccines, three different trigger points are  
5 considered: when cumulative infection rate reaches 0% (VAX0), 1% (VAX1) and 5%  
6 (VAX5). For close-schools, two trigger points are used: when the cumulative infection  
7 rate reaches 1% (CS1) and 5% (CS5). Compliant individuals are selected randomly  
8 from the entire Delhi population, and the mean infection rates are calculated separately  
9 for the slum and non-slum subpopulations. Although not reported here, qualitatively  
10 similar results are found for other transmission rates, as well as for higher vaccine  
11 efficacy (70%). Base is the baseline case with no interventions. The smaller-font  
12 numbers under the infection rate show the actual number of infected individuals.  
13  
14  
15

16 **FIGURE 5:** Mean cumulative infection rates for each category listed on the x-axis, for  
17 Network 2 and Network 1, under four different intervention scenarios. The color scheme  
18 of the boxes are based on the large values in the boxes—the cumulative infection rates.  
19 Darker colors correspond to higher infection rates. Smaller font values are the number  
20 of infected individuals. The vaccine efficacy is set at 30%. VsSs refers to the case when  
21 vaccines and social distancing are both applied to slum residents; VnSn refers to the  
22 case when vaccines and social distancing are applied to non-slum residents. Similarly,  
23 VsSn means vaccines are given to slums and stay home is applied to non-slums; and  
24 VnSs means vaccines are given to non-slums and stay home is applied to slums. Base  
25 refers to the case where no intervention is applied. The smaller-font numbers under the  
26 infection rates show the actual number of infected individuals in each category listed on  
27 the x-axis.  
28  
29  
30  
31  
32  
33  
34  
35  
36  
37  
38  
39  
40  
41  
42  
43  
44  
45  
46  
47  
48  
49  
50  
51  
52  
53  
54  
55  
56  
57  
58  
59  
60



1  
2  
3  
4  
5  
6  
7  
8  
9  
10  
11  
12  
13  
14  
15  
16  
17  
18  
19  
20  
21  
22  
23  
24  
25  
26  
27  
28  
29  
30  
31  
32  
33  
34  
35  
36  
37  
38  
39  
40  
41  
42  
43  
44  
45  
46  
47  
48  
49  
50  
51  
52  
53  
54  
55  
56  
57  
58  
59  
60



338x190mm (300 x 300 DPI)

review only

1  
2  
3  
4  
5  
6  
7  
8  
9  
10  
11  
12  
13  
14  
15  
16  
17  
18  
19  
20  
21  
22  
23  
24  
25  
26  
27  
28  
29  
30  
31  
32  
33  
34  
35  
36  
37  
38  
39  
40  
41  
42  
43  
44  
45  
46  
47  
48  
49  
50  
51  
52  
53  
54  
55  
56  
57  
58  
59  
60



338x190mm (300 x 300 DPI)

review only

1  
2  
3  
4  
5  
6  
7  
8  
9  
10  
11  
12  
13  
14  
15  
16  
17  
18  
19  
20  
21  
22  
23  
24  
25  
26  
27  
28  
29  
30  
31  
32  
33  
34  
35  
36  
37  
38  
39  
40  
41  
42  
43  
44  
45  
46  
47  
48  
49  
50  
51  
52  
53  
54  
55  
56  
57  
58  
59  
60

| Intervention   | Base    | C <sub>1</sub> | C <sub>2</sub> | S <sub>1</sub> | S <sub>2</sub> | I <sub>1</sub> | I <sub>2</sub> | V <sub>1</sub> | V <sub>2</sub> |
|----------------|---------|----------------|----------------|----------------|----------------|----------------|----------------|----------------|----------------|
| V <sub>1</sub> | 0.36    | 0.23           | 0              | 0              | 0              | 0              | 0              | 0              | 0              |
| V <sub>2</sub> | 5038837 | 3228985        | 20921          | 221            | 97             |                |                |                |                |
| I <sub>1</sub> | 0.37    | 0.25           | 0.11           | 0.04           | 0.02           |                |                |                |                |
| I <sub>2</sub> | 5061754 | 3405459        | 1549547        | 539181         | 322258         |                |                |                |                |
| S <sub>1</sub> | 0.37    | 0.27           | 0.19           | 0.13           | 0.1            |                |                |                |                |
| S <sub>2</sub> | 5146506 | 3802876        | 2618588        | 1781022        | 1318401        |                |                |                |                |
| C <sub>1</sub> | 0.3     | 0              | 0              | 0              | 0              |                |                |                |                |
| C <sub>2</sub> | 4158127 | 648            | 62             | 35             | 23             |                |                |                |                |
| S <sub>1</sub> | 0.36    | 0.12           | 0              | 0              | 0              |                |                |                |                |
| S <sub>2</sub> | 4939914 | 1659965        | 241            | 89             | 51             |                |                |                |                |
| I <sub>1</sub> | 0.36    | 0.24           | 0.14           | 0.08           | 0.06           |                |                |                |                |
| I <sub>2</sub> | 5017949 | 3367475        | 1880956        | 1121321        | 881914         |                |                |                |                |
| C <sub>1</sub> | 0.37    | 0.27           | 0.19           | 0.15           | 0.16           |                |                |                |                |
| C <sub>2</sub> | 5112280 | 3738161        | 2615064        | 2125815        | 2169135        |                |                |                |                |
| Base           | 0.42    | 0.42           | 0.42           | 0.42           | 0.42           |                |                |                |                |
|                | 5772516 | 5772516        | 5772516        | 5772516        | 5772516        |                |                |                |                |

| Intervention   | Base    | C <sub>1</sub> | C <sub>2</sub> | S <sub>1</sub> | S <sub>2</sub> | I <sub>1</sub> | I <sub>2</sub> | V <sub>1</sub> | V <sub>2</sub> |
|----------------|---------|----------------|----------------|----------------|----------------|----------------|----------------|----------------|----------------|
| V <sub>1</sub> | 0.44    | 0.33           | 0.19           | 0              | 0              |                |                |                |                |
| V <sub>2</sub> | 6070999 | 4584539        | 2669426        | 18530          | 206            |                |                |                |                |
| I <sub>1</sub> | 0.44    | 0.34           | 0.21           | 0.1            | 0.04           |                |                |                |                |
| I <sub>2</sub> | 6087287 | 4654816        | 2967789        | 1350667        | 554670         |                |                |                |                |
| S <sub>1</sub> | 0.44    | 0.35           | 0.26           | 0.17           | 0.13           |                |                |                |                |
| S <sub>2</sub> | 6146453 | 4898048        | 3594239        | 2329038        | 1818146        |                |                |                |                |
| C <sub>1</sub> | 0.39    | 0.03           | 0              | 0              | 0              |                |                |                |                |
| C <sub>2</sub> | 5465084 | 478780         | 85             | 37             | 23             |                |                |                |                |
| S <sub>1</sub> | 0.44    | 0.31           | 0.08           | 0              | 0              |                |                |                |                |
| S <sub>2</sub> | 6047827 | 4323509        | 1098024        | 543            | 83             |                |                |                |                |
| I <sub>1</sub> | 0.45    | 0.37           | 0.31           | 0.29           | 0.27           |                |                |                |                |
| I <sub>2</sub> | 6191602 | 5188739        | 4357831        | 4018271        | 3675802        |                |                |                |                |
| C <sub>1</sub> | 0.47    | 0.44           | 0.43           | 0.42           | 0.4            |                |                |                |                |
| C <sub>2</sub> | 6470698 | 6101056        | 5883830        | 5766943        | 5600599        |                |                |                |                |
| Base           | 0.48    | 0.48           | 0.48           | 0.48           | 0.48           |                |                |                |                |
|                | 6704038 | 6704038        | 6704038        | 6704038        | 6704038        |                |                |                |                |

338x190mm (300 x 300 DPI)

review only

1  
2  
3  
4  
5  
6  
7  
8  
9  
10  
11  
12  
13  
14  
15  
16  
17  
18  
19  
20  
21  
22  
23  
24  
25  
26  
27  
28  
29  
30  
31  
32  
33  
34  
35  
36  
37  
38  
39  
40  
41  
42  
43  
44  
45  
46  
47  
48  
49  
50  
51  
52  
53  
54  
55  
56  
57  
58  
59  
60

|  |                  |         |         |         |         |         |
|--|------------------|---------|---------|---------|---------|---------|
|  |                  | 0.69    | 0.58    | 0.4     | 0       | 0       |
|  | V <sub>100</sub> | 1263625 | 1041034 | 719517  | 7505    | 66      |
|  | V <sub>90</sub>  | 0.69    | 0.58    | 0.43    | 0.24    | 0.1     |
|  | V <sub>80</sub>  | 1296162 | 1052247 | 775240  | 426160  | 166606  |
|  | V <sub>70</sub>  | 0.7     | 0.6     | 0.49    | 0.36    | 0.29    |
|  | V <sub>60</sub>  | 1265497 | 1094158 | 890080  | 649544  | 525620  |
|  | ISO              | 0.65    | 0.08    | 0       | 0       | 0       |
|  | ISO              | 1168239 | 146106  | 20      | 7       | 3       |
|  | SHO              | 0.71    | 0.61    | 0.25    | 0       | 0       |
|  | SHO              | 1279142 | 1102671 | 460613  | 301     | 30      |
|  | CS <sub>1</sub>  | 0.72    | 0.7     | 0.67    | 0.66    | 0.65    |
|  | CS <sub>1</sub>  | 1311761 | 1260823 | 1215625 | 1194938 | 1171916 |
|  | CS <sub>2</sub>  | 0.73    | 0.72    | 0.72    | 0.71    | 0.71    |
|  | CS <sub>2</sub>  | 1326417 | 1309021 | 1298824 | 1292254 | 1283791 |
|  | Base             | 0.74    | 0.74    | 0.74    | 0.74    | 0.74    |
|  | Base             | 1337160 | 1337160 | 1337160 | 1337160 | 1337160 |
|  |                  | 10%     | 30%     | 50%     | 70%     | 90%     |

Compliance

|  |                  |         |         |         |         |         |
|--|------------------|---------|---------|---------|---------|---------|
|  |                  | 0.4     | 0.29    | 0.16    | 0       | 0       |
|  | V <sub>100</sub> | 4817373 | 3542870 | 1921714 | 11025   | 139     |
|  | V <sub>90</sub>  | 0.4     | 0.3     | 0.18    | 0.08    | 0.03    |
|  | V <sub>80</sub>  | 4831106 | 3602969 | 2192949 | 924508  | 368084  |
|  | V <sub>70</sub>  | 0.41    | 0.32    | 0.22    | 0.14    | 0.11    |
|  | V <sub>60</sub>  | 4880956 | 3803892 | 2704160 | 1679494 | 1292525 |
|  | ISO              | 0.36    | 0.03    | 0       | 0       | 0       |
|  | ISO              | 4298845 | 332875  | 65      | 30      | 20      |
|  | SHO              | 0.4     | 0.27    | 0.05    | 0       | 0       |
|  | SHO              | 4768685 | 3220638 | 637412  | 242     | 53      |
|  | CS <sub>1</sub>  | 0.41    | 0.33    | 0.26    | 0.23    | 0.21    |
|  | CS <sub>1</sub>  | 4879841 | 3927917 | 3142206 | 2823334 | 2503886 |
|  | CS <sub>2</sub>  | 0.43    | 0.4     | 0.38    | 0.37    | 0.36    |
|  | CS <sub>2</sub>  | 5144281 | 4792032 | 4585006 | 4474690 | 4316809 |
|  | Base             | 0.45    | 0.45    | 0.45    | 0.45    | 0.45    |
|  | Base             | 5366878 | 5366878 | 5366878 | 5366878 | 5366878 |
|  |                  | 10%     | 30%     | 50%     | 70%     | 90%     |

Compliance

338x190mm (300 x 300 DPI)

review only

1  
2  
3  
4  
5  
6  
7  
8  
9  
10  
11  
12  
13  
14  
15  
16  
17  
18  
19  
20  
21  
22  
23  
24  
25  
26  
27  
28  
29  
30  
31  
32  
33  
34  
35  
36  
37  
38  
39  
40  
41  
42  
43  
44  
45  
46  
47  
48  
49  
50  
51  
52  
53  
54  
55  
56  
57  
58  
59  
60

|           |                    |                   |                       |                    |
|-----------|--------------------|-------------------|-----------------------|--------------------|
| $V_{sSs}$ | 0.44<br>6043049    | 0.55<br>989079    | 0.42<br>5053971       | 0.37<br>5176345    |
| $V_{sSn}$ | 0.43<br>5938919    | 0.58<br>1042116   | 0.41<br>4896803       | 0.36<br>4995753    |
| $V_{nSs}$ | 0.44<br>6023678    | 0.67<br>1217415   | 0.40<br>4806263       | 0.36<br>4986302    |
| $V_{nSn}$ | 0.44<br>6104571    | 0.72<br>1309577   | 0.40<br>4794993       | 0.36<br>5016324    |
| Base      | 0.48<br>6704038    | 0.74<br>1337160   | 0.45<br>5366878       | 0.42<br>5772516    |
|           | Total<br>Network 2 | Slum<br>Network 2 | Non-slum<br>Network 2 | Total<br>Network 1 |

127x114mm (300 x 300 DPI)

only

Supplemental Information

**Disparities in Spread and Control of Influenza in Slums of Delhi:  
Findings From An Agent-Based Modeling Study**

A. Adiga, S. Chu, S. Eubank, C. J. Kuhlman, B. Lewis, A. Marathe, M. Marathe, E. K. Nordberg, S. Swarup, A. Vullikanti and M. L. Wilson

For peer review only

1  
2  
3  
4  
5  
6  
7  
8  
9  
10  
11  
12  
13  
14  
15  
16  
17  
18  
19  
20  
21  
22  
23  
24  
25  
26  
27  
28  
29  
30  
31  
32  
33  
34  
35  
36  
37  
38  
39  
40  
41  
42  
43  
44  
45  
46  
47  
48  
49  
50  
51  
52  
53  
54  
55  
56  
57  
58  
59  
60

## Supplemental Information

**Presentation of Results.**

For each set of input parameters, 25 replicates were run using agent-based simulation and the results presented are the average values over the 25 replicates. Also, 95% confidence intervals (CIs) are given when appropriate.

**Comparisons Between Network 1 and Network 2.**

Table S1 shows some differences between network1 and network 2 due to their different ways of modeling slum population. Note that these two networks are the same ones as those used in Chen et al.[1]. Further comparisons between the two networks are found in Chen et al.[2].

**Table S1.** Comparison of two networks as well as data sources for slum and non-slum Delhi, India.

|                                       | Network 1      |              | Network 2                                          |            |
|---------------------------------------|----------------|--------------|----------------------------------------------------|------------|
|                                       | Slum           | Non-slum     | Slum                                               | Non-slum   |
| Population Size                       | 0              | 13.8 million | 1.8 million                                        | 12 million |
| Average Household Size of Slum Region | 5.2            |              | 15.5                                               |            |
| Daily Activities                      | 33,890,156     |              | 39,077,861                                         |            |
| Number of Edges                       | 210,428,521    |              | 231,258,772                                        |            |
| Average Degree                        | 30.4           |              | 33.4                                               |            |
| Maximum Degree                        | 170            |              | 180                                                |            |
| Data Sources                          | MapMyIndia.com |              | MapMyIndia.com<br>Indiamart.com<br>MapMechanic.com |            |

Network 2 contains 298 slum zones, while network 1 models the whole population as non-slum. For network 1, the non-slum demographics and activities data is collected by survey through MapMyIndia.com. While for slum population, we collected additional data by Indiamart.com and MapMechanic.com for slum demographics and activities as well as slum polygons. More detailed demographic and activity differences can be found in the Chen et al.[1]

**Terminology and Abbreviations for Interventions.**

Table S2 contains abbreviations for different interventions and their meanings. Stay-at-home (SHO) and social isolation (ISO) interventions are applied to a person immediately after they become infected, while close-schools (CS) and vaccinations (VAX) may be applied after a specified fraction of the total population has been infected.

**Table S2:** Summary of abbreviations for interventions and their meanings.

## Supplemental Information

| Abbreviation | Definition                                                                                                                                                                                         |
|--------------|----------------------------------------------------------------------------------------------------------------------------------------------------------------------------------------------------|
| CS           | Close-schools: School-related interactions are eliminated.                                                                                                                                         |
| CSx          | Close-schools is implemented after the total fraction of the population that has been infected reaches x.                                                                                          |
| ISO          | Social isolation: a person who is socially isolated does not interact with any other person, even people in their home. Isolation is triggered only after a person becomes infectious.             |
| SHO          | Stay at home: All out-of-the-home activities for this person are eliminated, and this person only interacts with others at home. Stay at home is triggered only after a person becomes infectious. |
| VAX          | Vaccination: a person who is vaccinated has a reduced probability of contracting the virus.                                                                                                        |
| VAXx         | Vaccination of an individual occurs after the total fraction of the population that has been infected reaches x.                                                                                   |

Table S3 contains the variables used in simulations. The transmissibility corresponds to strong flu in Chen et al.[1] For vaccination, efficacy is either 30% or 70%. That is, for 30% efficacy, a person who gets vaccinated has reduced their susceptibility to infection by 30%.

**Table S3:** Summary of parameters and values used in simulations.

| Category                              | Values                                                                                                |
|---------------------------------------|-------------------------------------------------------------------------------------------------------|
| Networks of Delhi                     | Network 1 (does not model slums); Network 2 (models slums).                                           |
| Seeding                               | 20 people selected randomly over the entire population at time 0 as index cases.                      |
| Transmissibility                      | 0.000027.                                                                                             |
| Intervention approaches.              | Base case (no intervention); close-schools (CS); stay-home (SHO); isolation (ISO); vaccination (VAX). |
| Intervention/compliance rates.        | 10%, 30%, 50%, 70%, 90%.                                                                              |
| Efficacy of vaccination intervention. | 30%, 70%.                                                                                             |
| Intervention trigger time             | Cumulative infection rate reaches 0%, 1% and 5%.                                                      |
| Simulation replicates                 | 25                                                                                                    |

### The Agent Epidemic States and Disease Model.

An SEIR, Susceptible (S), Exposed (E), Infectious (I) and Removed or Recovered (R) model is considered within each individual. An infectious person spreads the disease to each susceptible neighbor independently with a probability referred to as the transmission probability, given by

$$p = \lambda (1 - (1 - \tau)^{\Delta t}),$$



## Supplemental Information

where  $\lambda$  is a scaling factor to lower the probability (e.g., in the case of vaccination),  $\tau$  is the transmissibility and  $\Delta t$  is the duration of interaction in minutes. Durations of contact are labels on the network edges. A susceptible person undergoes independent trials from all of its neighbors that are infectious. The transmission probability is a function of the number and duration of contacts.[3] This is selected to simulate an Influenza model resulting in a  $R_0=1.26$  (cumulative attack rate 42%, corresponding to a transmissibility of 0.000027 per minute of contact time) for Network 1, and  $R_0=1.39$  (cumulative attack rate 48%) for Network 2.[4] This transmissibility value is used uniformly throughout this study and corresponds to the probability at which an infectious node infects a susceptible node per minute of contact.

At each time (day), if an infectious person infects a susceptible person, the susceptible person transitions to the exposed (or incubating) state. The exposed person has contracted Influenza but cannot yet spread it to others. The incubation period is assigned per person, according to the following distribution: 1 day (30%); 2 days (50%); 3 days (20%). At the end of the exposed or incubation period, the person switches to an infected state. The duration of infectiousness is assigned per person, according to the distribution: 3 days (30%); 4 days (40%); 5 days (20%); 6 days (10%). After the infectious period, the person recovers and stays healthy for the simulation period. This sequence of state transitions is irreversible and is the only possible disease progression.

## Epidemic Curves for Other Interventions, for Varying Efficacy and Compliances.

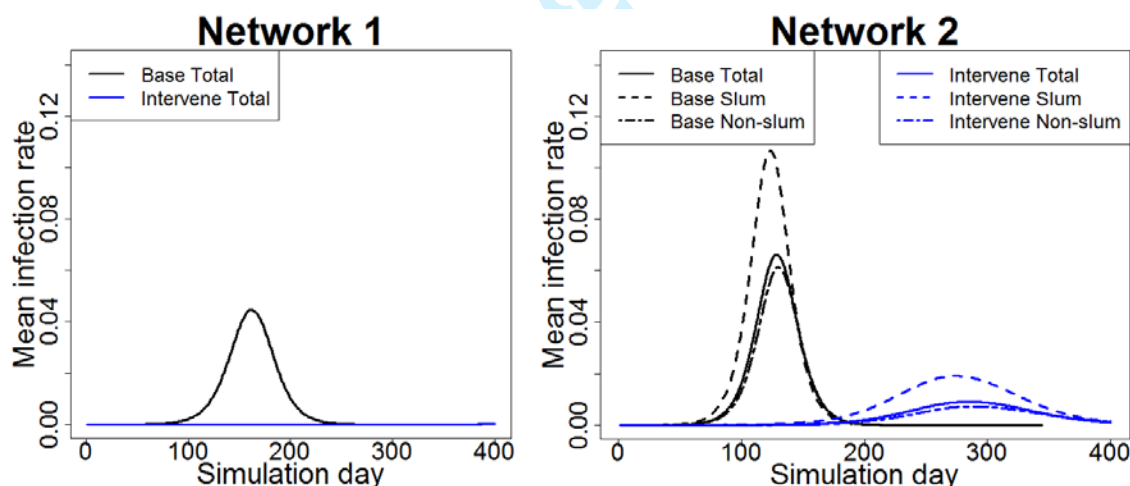

**Figure S1:** Epidemic curves for the base case and the vaccination case. The vaccines are given randomly to 50% of the entire population, and the vaccine efficacy is assumed to be 30%. The transmissibility is 0.000027.

Supplemental Information



**Figure S2:** Epidemic curves for the base case and vaccination case. The vaccines are given randomly to 10% of the entire population and the vaccine efficacy is 70%. The transmissibility is 0.000027.

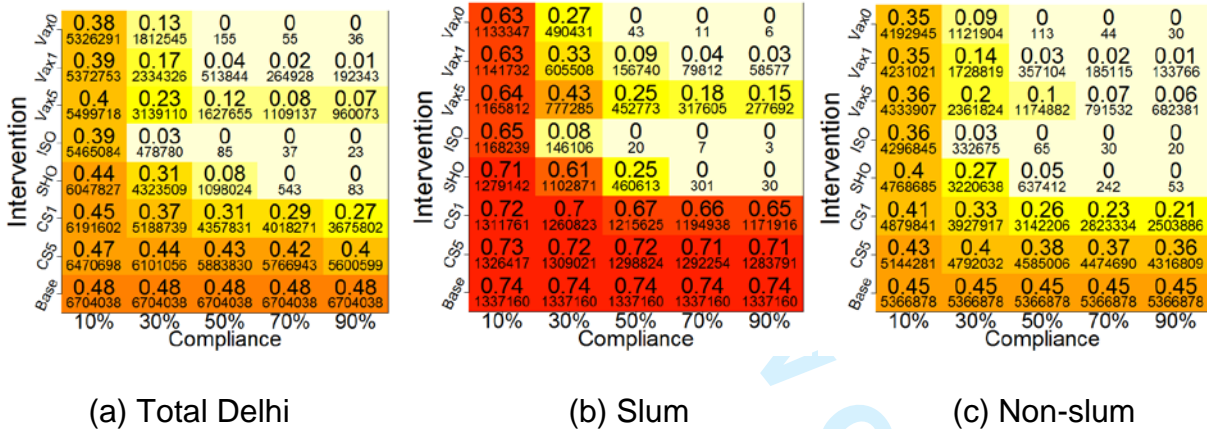

**Figure S3.** Heat map of mean cumulative infection rates in Delhi, and slum and non-slum regions under different intervention strategies for Network 2. The vaccination efficacy is fixed at 70%. Five different compliance rates, i.e., 10%, 30%, 50%, 70% and 90% and 4 types of intervention strategies, i.e. vaccination (VAX), close-schools (CS), stay-home (SHO) and isolation (ISO), are considered. For vaccines, three different trigger points are considered: when cumulative infection rate reaches 0% (VAX0), 1% (VAX1) and 5% (VAX5). For close-schools, two trigger points are used i.e. when cumulative infection rate reaches 1% (CS1) and 5% (CS5). Compliant individuals are selected randomly from the entire Delhi population and the mean cumulative infection rates are calculated separately for the total population, and slum and non-slum subpopulations. Base is the baseline case with no interventions. The smaller-font numbers under the infection rate show the actual number of infected individuals. Darker colors correspond to higher infection rates.

## Supplemental Information

### Tabulations of Basic Results: Comparisons between Networks 1 and 2 for Compliance of 30% and Efficacy of 30%.

Table S4 shows results when 30% of the population that is selected uniformly at random is vaccinated with a vaccine that is 30% effective. The contrast between the two populations is even greater when considering interventions. The peak infection rate of the entire population increases by 123.2% (95% CI: 122.7%-123.7%) in Network 2 compared to Network 1 for the intervention, versus 47.6% difference between the networks in Table S8. The time to peak decreases by 35.7% (95% CI: 32.9%-38.8%) in Network 2 compared to that in Network 1, for the intervention case, compared to only 20.84% percentage change between the two Networks for the base case in Table S8. The cumulative infection rate (or attack rate) is also underestimated, which is 42.2% (95% CI: 41.5%-42.8%) greater on average in Network 2 compared to Network 1 for the intervention case. Hence, the differences between key epidemic results for Networks 1 and 2 that are generated for the intervention case are even more pronounced than they are for the base case. These values are all statistically significant.

**Table S4:** Comparisons of key epidemic parameters for Networks 1 and 2 for a vaccination intervention before the epidemic starts (VAX0), where the vaccine efficacy is 30% and the compliance rate is 30%.

| Vaccination               | Network 1 | Network 2 | Compare-absolute               | Compare-relative                     |
|---------------------------|-----------|-----------|--------------------------------|--------------------------------------|
| Time to Peak              | 286       | 184       | 102<br>(95% CI: 94-111)        | 35.7%<br>(95% CI: 32.9%-38.8%)       |
| Peak Infection Rate       | 1.34%     | 2.99%     | 1.65%<br>(95% CI: 1.64%-1.66%) | 123.19%<br>(95% CI: 122.69%-123.65%) |
| Cumulative Infection Rate | 23.3%     | 33.1%     | 9.82%<br>(95% CI: 9.67%-9.96%) | 42.17%<br>(95% CI: 41.51%-42.77%)    |

Table S5 shows the effect of delay in applying interventions. The numbers show the percentage difference in cumulative infection rate in slums and non-slums of Network 2 for the specified interventions and compliance rates at different trigger levels. For example, the value 30.55% at 0.1% compliance means that for intervention close-schools, where this intervention is implemented after 5% of the total population is infected, the fraction of people in slums that get infected is 30.55% greater than the fraction of non-slum residents who get infected.

**Table S5.** Differences of epidemic size between slum and non-slum regions for Network 2 for base case (no intervention); close-schools (CS) after 1% total outbreak fraction (CS1) and after 5% total outbreak fraction (CS5); stay at home (SHO); social isolation (ISO); vaccination (VAX) after 1% total outbreak fraction (VAX1) and after 5% total outbreak fraction (VAX5), under various compliance rates. The vaccination efficacy is 30%.

| Compliance | Base   | CS5    | CS1    | SHO    | ISO    | VAX5   | VAX1   |
|------------|--------|--------|--------|--------|--------|--------|--------|
| 0.1        | 29.30% | 30.55% | 31.94% | 31.06% | 28.85% | 29.37% | 29.27% |
| 0.3        | 29.30% | 32.52% | 37.03% | 34.18% | 5.31%  | 28.85% | 28.21% |

## Supplemental Information

|     |        |        |        |        |       |        |        |
|-----|--------|--------|--------|--------|-------|--------|--------|
| 0.5 | 29.30% | 33.67% | 41.07% | 20.16% | 0.00% | 26.72% | 24.62% |
| 0.7 | 29.30% | 34.23% | 42.57% | 0.01%  | 0.00% | 21.94% | 15.87% |
| 0.9 | 29.30% | 35.07% | 43.95% | 0.00%  | 0.00% | 18.31% | 7.25%  |

Table S6 examines the difference in effects of interventions on the cumulative infection rate in Network 2. These data use both the stay home (SHO) and the isolation (ISO) interventions as base cases. Each entry represents the difference between the cumulative infection rates for the specified pharmaceutical interventions and SHO or ISO. For example, 18.03% means that the cumulative infection rate for vaccinating after 5% of the population is infected, is 18.03% greater than that for the intervention of SHO; 31.92% means that the cumulative infection rate for vaccinating after 5% of the population is infected is 31.92% greater than that for the intervention of ISO. Thus, the larger the magnitude of a positive number, the greater the effectiveness of SHO or ISO compared to the specified pharmaceutical intervention.

**Table S6.** Differences in epidemic size between stay at home (SHO) interventions, social isolation (ISO) interventions and pharmaceutical interventions (VAX0, VAX1, VAX5), under various compliance rates. The compliance rate and efficacy for vaccination is 30% and 30%, respectively.

| Compliance | Vax5-SHO | Vax1-SHO | Vax0-SHO | VAX5-ISO | VAX1-ISO | VAX0-ISO |
|------------|----------|----------|----------|----------|----------|----------|
| 0.1        | 0.71%    | 0.29%    | 0.17%    | 4.92%    | 4.49%    | 4.38%    |
| 0.3        | 4.15%    | 2.39%    | 1.89%    | 31.92%   | 30.17%   | 29.66%   |
| 0.5        | 18.03%   | 13.51%   | 11.35%   | 25.96%   | 21.44%   | 19.28%   |
| 0.7        | 16.82%   | 9.75%    | 0.13%    | 16.82%   | 9.76%    | 0.13%    |
| 0.9        | 13.13%   | 4.01%    | 0.00%    | 13.13%   | 4.01%    | 0.00%    |

### Effect of intervention on Network 2, With and Without Interventions.

The comparison between vaccination intervention and the base case in Network 2 is detailed in Table S7 below.

In Network 2, for the total population, vaccination delays the time to peak infection by 43.27% (95% CI: 40.14%-46.41%) relatively, from 128 to 184 days on average, while the peak infection rate is reduced by about 3.88% from 2.99% to 6.87% on average (56.47% relatively with 95% CI: 56.35%-56.56%). The total infection rate is reduced by 15.31% from 33.12% to 48.43% (31.62% relatively with 95% CI: 31.57%-31.67%).

In slum regions in Network 2, vaccination delays the time to peak infection by 43.09% (95% CI: 39.78%-46.4%) relatively, from 123 to 176 days on average, while the peak infection rate is reduced by about 5.70% from 5.42% to 11.12% on average (51.26% relatively with 95% CI: 50.88%-51.64%). The total infection rate in slums is reduced by 16.35% from 57.53% to 73.88% (22.13% relatively with 95% CI: 22.07% to 22.19%).

## Supplemental Information

In non-slum regions in Network 2, the time to peak is delayed by 43.44% (95% CI: 40.32%-46.56%) relatively, from 130 to 186 days on average, while the peak infection rate is reduced by about 3.68% from 2.69% to 6.36% on average (57.79% relatively with 95% CI: 57.64%-57.94%). The total infection rate in non-slums is reduced by 15.16% from 44.60% to 29.45% (33.98% relatively with 95% CI: 33.93% -34.03%).

**Table S7:** Comparisons between the base and vaccination cases for Network 2. The three parameters (time to peak, peak infection rate and cumulative infection rate) are broken out, and for each, values for the total population, and slum and non-slum subpopulations are given. The vaccination rate is 30% and efficacy is 30% for those receiving the vaccine.

| Network 2,<br>Time to Peak | Base | Vaccination | Compare-absolute   | Compare-Relative                       |
|----------------------------|------|-------------|--------------------|----------------------------------------|
| Total                      | 128  | 184         | 55 (95% CI: 51-59) | 43.27%<br>(95% CI: 40.14%-46.41%)      |
| Slum                       | 123  | 176         | 53 (95% CI: 49-57) | 43.09%<br>(95% CI: 39.78%-46.4%)       |
| Non-Slum                   | 130  | 186         | 56 (95% CI: 52-60) | 43.44%<br>(95% CI: 40.32% -<br>46.56%) |

| Network 2,<br>Peak Infection<br>Rate | Base   | Vaccination | Compare-absolute                    | Compare-Relative                     |
|--------------------------------------|--------|-------------|-------------------------------------|--------------------------------------|
| Total                                | 6.87%  | 2.99%       | -3.88%<br>(95% CI: -3.870% -3.884%) | -56.46%<br>(95% CI: -56.35% -56.56%) |
| Slum                                 | 11.12% | 5.42%       | -5.70%<br>(95% CI: -5.66% -5.74%)   | -51.26%<br>(95% CI: -50.88% -51.64%) |
| Non-Slum                             | 6.36%  | 2.69%       | -3.68%<br>(95% CI: -3.67% -3.69%)   | -57.79%<br>(95% CI: -57.64% -57.94%) |

| Network 2,<br>Cumulative<br>Infection Rate | Base   | Vaccination | Compare-absolute                     | Compare-Relative                     |
|--------------------------------------------|--------|-------------|--------------------------------------|--------------------------------------|
| Total                                      | 48.43% | 33.12%      | -15.31%<br>(95% CI: -15.29% -15.34%) | -31.62%<br>(95% CI: -31.57% -31.67%) |
| Slum                                       | 73.88% | 57.53%      | -16.35%<br>(95% CI: -16.30% -16.39%) | -22.13%<br>(95% CI: -22.07% -22.19%) |
| Non-Slum                                   | 44.60% | 29.45%      | -15.16%<br>95% CI: (-15.14% -15.18%) | -33.98%<br>(95% CI: -33.93% -34.03%) |

## Supplemental Information

Table S8 summarizes differences in key epidemic parameters for Networks 1 and 2 for the base case with no interventions. The peak infection rate is the maximum fraction of individuals who are infected on any day, the time to peak is the day on which the peak infection rate occurs, and cumulative infection rate is the cumulative fraction of individuals who get infected in the epidemic. Under the base case, the peak infection rate in Network 2 is 47.6% (95% CI: 47.4%-47.8%) greater compared to that in Network 1 ( $47.6\% = (6.87\% - 4.65\%) / 4.65\%$ ). The time to peak infection for Network 2 is decreased by 20.8% (95% CI: 19.2%-22.7%) compared to that in Network 1. The cumulative infection rate (or attack rate) is also underestimated under Network 1 by 16.1% (95% CI: 16.1%-16.2%) compared to Network 2. These results, presented in the main paper, are tabulated here in Table S8 for convenience and comparison.

**Table S8:** Comparisons of key epidemic parameters for Networks 1 and 2 for the base case.

| Base                      | Network 1 | Network 2 | Compare-absolute                  | Compare-relative                  |
|---------------------------|-----------|-----------|-----------------------------------|-----------------------------------|
| Time to Peak              | 162       | 128       | 34<br>(95% CI: 31-37)             | 20.84%<br>(95% CI: 19.19%-22.71%) |
| Peak Infection Rate       | 4.65%     | 6.87%     | 2.215%<br>(95% CI: 2.206%-2.224%) | 47.6%<br>(95% CI: 47.4%-47.8%)    |
| Cumulative Infection Rate | 41.70%    | 48.43%    | 6.73%<br>(95% CI: 6.71%-6.75%)    | 16.1%<br>(95% CI: 16.1%-16.2%)    |

### Effect of intervention on Network 1, With and Without Interventions.

In Network 1, vaccination delays the time to peak infection by 76.41%, from 162 to 286 days on average, with 95% CI: 71.53%-81.28%. The peak infection rate is reduced by 3.3121 percentage points, from 1.34% to 4.65%, which is a relative percentage difference (RPD) of -71.20%, with 95% CI: -71.02% to -71.38%. These and cumulative infection rate data are given in Table S9.

**Table S9:** Comparisons of a vaccination intervention (30% vaccination rate, 30% efficacy of a vaccination) with the base case in Network 1 Delhi.

| Network 1, Total          | Base  | Vaccination | Compare-absolute                  | Compare-relative                  |
|---------------------------|-------|-------------|-----------------------------------|-----------------------------------|
| Time to Peak              | 162   | 286         | 124<br>(95% CI: 116-132)          | 76.41%<br>(95% CI: 71.53%-81.28%) |
| Peak Infection Rate       | 4.65% | 1.34%       | 3.31%<br>(95% CI: 3.30%-3.32%)    | 71.20%<br>(95% CI: 71.02%-71.38)  |
| Cumulative Infection Rate | 41.7% | 23.3%       | 18.40%<br>(95% CI: 18.25%-18.55%) | 44.13%<br>(95% CI: 43.77%-44.48%) |

Tables S7 and S9 show that, generally, Network 1 is more responsive to intervention than Network 2. In Network 1, the percentage changes in time-to-peak, peak infection rate, and cumulative infection rate, due to intervention, are 76.4%, -71.2%, and -44.1%,

## Supplemental Information

respectively. For Network 2, these values are 43.3%, -56.5%, and -31.6%, respectively. The reason for lower impact in Network 2 is the greater connectivity of households in slums, which helps drive the contagion.

### Effect of interventions on slum and non-slum subpopulations of Network 2, compared to the base case.

The data used in comparing key outbreak parameters in slum and non-slum regions are taken from Table S7, and the corresponding epidemic curves are in Figure 1. The percentage change in peak infection rate due to intervention in slum (-51.3%) and non-slum (-57.8%) regions in Network 2, are comparable, although the magnitudes of the peak infections in slums are about twice those in the non-slum regions. For the cumulative infection rates, the relative drop from the intervention is greater for the non-slum (-34.0% vs. -22.1%) population than it is for the slum population, but the absolute drop is about the same (-16.3% vs. -15.1%).

**Table S10:** Comparison of results between slum and non-slum in Network 2. The input data is the same as in Table S7.

| Network 2, Base           | Slum   | Nonslum | Compare-absolute                    | Compare-relative                  |
|---------------------------|--------|---------|-------------------------------------|-----------------------------------|
| Time to Peak              | 123    | 130     | 7(95% CI: 4-9)                      | 5.26%<br>(95% CI: 3.37%-7.16%)    |
| Peak Infection Rate       | 1.12%  | 6.36%   | 4.76%<br>(95% CI: 4.72%-4.80%)      | 42.79%<br>(95% CI: 42.46%-43.14%) |
| Cumulative infection rate | 73.88% | 44.60%  | 29.25%<br>(95% CI: 29.25% - 29.31%) | 39.63%<br>(95% CI: 39.59%-39.67%) |

| Network 2, Vaccination    | Slum   | Nonslum | Compare-absolute                  | Compare-relative                  |
|---------------------------|--------|---------|-----------------------------------|-----------------------------------|
| Time to Peak              | 176    | 186     | 10(95% CI: 5-15)                  | 5.23%<br>(95% CI: 2.58%-8.46%)    |
| Peak Infection Rate       | 5.42%  | 2.69%   | 2.74%<br>(95% CI: 2.71% - 2.76%)  | 50.46%<br>(95% CI: 50.06%-50.86%) |
| Cumulative infection rate | 57.53% | 29.45%  | 28.08%<br>(95% CI: 28.04%-28.12%) | 48.82%<br>(95% CI: 48.74%-48.89%) |

Figure S4 contains the percentage changes between the base case and intervention case for Networks 1 and 2 for the three parameters in the legend, and further breaks down Network 2 into slum and non-slum subpopulations. This plot provides a summary of differences between the base and intervention cases. For all four conditions considered, the intervention reduces the severity of an epidemic. It delays the time when the infection peaks, and reduces the peak infection and the cumulative infection rates. Note that the intervention has a larger effect on the epidemics when applied to Network 1, as consistent with Figure 1.

## Supplemental Information



**Figure S4:** Effects of vaccination on time to peak infection, peak infection rate, and cumulative infection rate. The intervention is 30% vaccination rate and 30% vaccine efficacy. Each bar refers to the average value of the relative difference over 25 runs. Vaccination is more effective for Network 1 than Network 2, while, for Network 2, it is slightly more effective for the non-slum population than slum. Details of the data associated with this plot are provided in Tables S7 and S9.

Figure S5 provides the same data in as in Figure S7, but now the data are provided as absolute differences, rather than as percentage changes. (There are three separate plots owing to the different ranges in absolute differences. Qualitatively, the time to peak infection (blue bars) does not change between the two networks and the two subpopulations of Network 2 (Figure S4 versus Figure S5(a)). However, the red bars in Figure S4 are qualitatively different from those in Figure S5(b), when considering absolute changes. That is, the magnitude of the percentage change in peak infection rate between the base and intervention cases is greatest in Network 1 (Figure S4, red bars), while in Figure S5(b), it is least on an absolute change basis. Similarly, the slum population in Network 2 shows the least percentage change in Figure S4, but the greatest absolute change in Figure S5(b). Rankings of the subpopulations in Network 2 is also reversed for cumulative infection rate: the percentage change is greatest in the non-slum region, while it is greatest for the slum regions in absolute terms.



Supplemental Information



**Figure S5:** Comparison of absolute difference in improvement; the relative differences are shown in Figure S7. Absolute differences vary across the three parameters, so each is given on a separate scale. Data are summarized in Tables S7 and S9.

**Evaluation of Network 2 Home and School Contacts.**



## Supplemental Information

**Figure S6:** Comparison of average contacts per person in slum and non-slum regions for home and school activity types in Network 2.

### Evaluation of Network 2 Edges Transmitting Infection.

Figure S7 provides counts of edges used to transmit infection for a base case simulation in Network 2 of Figure 1 of the main text. Edges are broken down by activity types of people who are interacting during transmission. Data are also broken down by the classifications of individuals interacting (e.g., slum and nonslum, see legend).

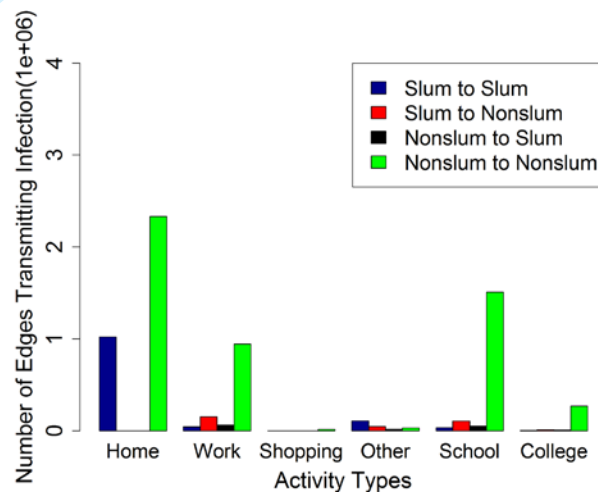

**Figure S7.** Data for Network 2. Number of edges transmitting infection (in millions) for each of the four types of interactions between slum and nonslum individuals (see legend) and for each activity type. The number of slum-to-nonslum edges is greater than nonslum-to-slum ones because once infection gets into a slum household, it may spread within the household more (because there are more people and connections). Thus, a slum household carries more infection to its interactions with nonslum people. The “Other” activity category, like home activity, shows more edges carrying infection for slum-to-slum interactions than slum-to-nonslum, which is consistent with Figures S4 and S6 of Chen et al.[2], where further network characteristics are given.

## Supplemental Information

## References

1. Chen J, Chu S, Chungbaek Y, Khan M, Kuhlman C, Marathe A, Mortveit H, Vullikanti A and Xie D. Effect of Modeling Slum Populations on Influenza Spread in Delhi. *BMJ Open*, Vol. 6, Issue 9, 2016a.
2. Chen J, Chu S, Chungbaek Y, Khan M, Kuhlman C, Marathe A, Mortveit H, Vullikanti A, Xie D. Supplemental Information for Effect of Modelling Slum Populations on Influenza Spread in Delhi. *BMJ Open*, 2016b, Sep 1;6(9):e011699.  
Available at: <http://bmjopen.bmj.com/content/6/9/e011699/DC1/embed/inline-supplementary-material-1.pdf>
3. Yang Y, Sugimoto JD, Halloran ME, Basta NE, Chao DL, Matrajt L, Potter G, Kenah E, Longini IM. The transmissibility and control of pandemic influenza A (H1N1) virus. *Science* 2009 Oct 30;326(5953):729-733.
4. Jesan T, Menon G, Sinha S. Epidemiological dynamics of the 2009 influenza A(H1N1) v outbreak in India. *Current Science* (00113891) 2011; 100(7): 1051.

# BMJ Open

## Disparities in Spread and Control of Influenza in Slums of Delhi: Findings From An Agent-Based Modeling Study

|                                 |                                                                                                                                                                                                                                                                                                                                                                                                                                                                                                                                                                                                                                                                                                                                                                                                                                                                                                                                                                                                                                                                                                                                                                                                                                                                                 |
|---------------------------------|---------------------------------------------------------------------------------------------------------------------------------------------------------------------------------------------------------------------------------------------------------------------------------------------------------------------------------------------------------------------------------------------------------------------------------------------------------------------------------------------------------------------------------------------------------------------------------------------------------------------------------------------------------------------------------------------------------------------------------------------------------------------------------------------------------------------------------------------------------------------------------------------------------------------------------------------------------------------------------------------------------------------------------------------------------------------------------------------------------------------------------------------------------------------------------------------------------------------------------------------------------------------------------|
| Journal:                        | <i>BMJ Open</i>                                                                                                                                                                                                                                                                                                                                                                                                                                                                                                                                                                                                                                                                                                                                                                                                                                                                                                                                                                                                                                                                                                                                                                                                                                                                 |
| Manuscript ID                   | bmjopen-2017-017353.R3                                                                                                                                                                                                                                                                                                                                                                                                                                                                                                                                                                                                                                                                                                                                                                                                                                                                                                                                                                                                                                                                                                                                                                                                                                                          |
| Article Type:                   | Research                                                                                                                                                                                                                                                                                                                                                                                                                                                                                                                                                                                                                                                                                                                                                                                                                                                                                                                                                                                                                                                                                                                                                                                                                                                                        |
| Date Submitted by the Author:   | 31-Oct-2017                                                                                                                                                                                                                                                                                                                                                                                                                                                                                                                                                                                                                                                                                                                                                                                                                                                                                                                                                                                                                                                                                                                                                                                                                                                                     |
| Complete List of Authors:       | Adiga , Abhijin ; Network Dynamics and Simulation Sciences Laboratory, Biocomplexity Institute, Virginia Tech<br>Chu, Shuyu; Network Dynamics and Simulation Sciences Laboratory, Biocomplexity Institute, Virginia Tech<br>Eubank, Stephen; Network Dynamics and Simulation Sciences Laboratory, Biocomplexity Institute, Virginia Tech<br>Kuhlman, Christopher ; Network Dynamics and Simulation Sciences Laboratory, Biocomplexity Institute, Virginia Tech<br>Lewis, Bryan ; Network Dynamics and Simulation Sciences Laboratory, Biocomplexity Institute, Virginia Tech<br>Marathe, Achla; Network Dynamics and Simulation Sciences Laboratory, Biocomplexity Institute, Virginia Tech, ;<br>Marathe, Madhav ; Network Dynamics and Simulation Sciences Laboratory, Biocomplexity Institute, Virginia Tech<br>Nordberg, Eric ; Network Dynamics and Simulation Sciences Laboratory, Biocomplexity Institute, Virginia Tech<br>Swarup, Samarth; Network Dynamics and Simulation Sciences Laboratory, Biocomplexity Institute, Virginia Tech<br>Vullikanti, Anil; Network Dynamics and Simulation Sciences Laboratory, Biocomplexity Institute, Virginia Tech<br>Wilson, Mandy ; Network Dynamics and Simulation Sciences Laboratory, Biocomplexity Institute, Virginia Tech |
| <b>Primary Subject Heading</b>: | Global health                                                                                                                                                                                                                                                                                                                                                                                                                                                                                                                                                                                                                                                                                                                                                                                                                                                                                                                                                                                                                                                                                                                                                                                                                                                                   |
| Secondary Subject Heading:      | Epidemiology, Public health, Health informatics, Infectious diseases                                                                                                                                                                                                                                                                                                                                                                                                                                                                                                                                                                                                                                                                                                                                                                                                                                                                                                                                                                                                                                                                                                                                                                                                            |
| Keywords:                       | Delhi, epidemic, interventions, slum population, synthetic social contact network                                                                                                                                                                                                                                                                                                                                                                                                                                                                                                                                                                                                                                                                                                                                                                                                                                                                                                                                                                                                                                                                                                                                                                                               |
|                                 |                                                                                                                                                                                                                                                                                                                                                                                                                                                                                                                                                                                                                                                                                                                                                                                                                                                                                                                                                                                                                                                                                                                                                                                                                                                                                 |

SCHOLARONE™  
Manuscripts

1 Main manuscript  
2  
3  
4  
5

6 **Disparities in Spread and Control of Influenza in Slums of Delhi:**  
7 **Findings From An Agent-Based Modeling Study**  
8

9 A. Adiga, S. Chu, S. Eubank, C. J. Kuhlman, B. Lewis, A. Marathe, M. Marathe, E. K.  
10 Nordberg, S. Swarup, A. Vullikanti and M. L. Wilson  
11

12  
13  
14 Corresponding Author:  
15 Achla Marathe  
16

17  
18 Network Dynamics and Simulation Sciences Laboratory  
19 Biocomplexity Institute  
20 Virginia Tech  
21 1015 Life Science Circle  
22 Blacksburg, VA 24061-0477, USA  
23 [amarathe@vt.edu](mailto:amarathe@vt.edu)  
24

25  
26 (F): 540-231-2891  
27 (P): 540-231-9210  
28

29 Co-authors:  
30 Abhijin Adiga, Shuyu Chu, Stephen Eubank, Chris J Kuhlman, Bryan Lewis, Achla  
31 Marathe, Madhav Marathe, Eric K Nordberg, Samarth Swarup, Anil Vullikanti, Mandy L  
32 Wilson  
33  
34

35 Network Dynamics and Simulation Sciences Laboratory  
36 Biocomplexity Institute  
37 Virginia Tech  
38 1015 Life Science Circle  
39 Blacksburg, VA 24061-0477, USA  
40  
41

42 Keywords: Delhi; epidemic; interventions; slum population; synthetic social contact  
43 network.  
44

45  
46  
47 Word count: 7254  
48  
49  
50  
51  
52  
53  
54  
55  
56  
57  
58  
59  
60

1  
2  
3  
4  
5  
6  
7  
8  
9  
10  
11  
12  
13  
14  
15  
16  
17  
18  
19  
20  
21  
22  
23  
24  
25  
26  
27  
28  
29  
30  
31  
32  
33  
34  
35  
36  
37  
38  
39  
40  
41  
42  
43  
44  
45  
46  
47  
48  
49  
50  
51  
52  
53  
54  
55  
56  
57  
58  
59  
60

Main manuscript

## ABSTRACT

**Objectives** This research studies the role of slums in the spread and control of infectious diseases in the National Capital Territory of India, Delhi, using a detailed social contact network of its residents.

**Methods** We use an agent-based model to study the spread of influenza in Delhi through person-to-person contact. Two different networks are used; one in which slum and non-slum regions are treated the same and the other in which 298 slum zones are identified. In the second network, slum-specific demographics and activities are assigned to the individuals whose homes reside inside these zones. The main effects of integrating slums is that the network has more home-related contacts due to larger family sizes and more outside contacts due to more daily activities outside home. Various vaccination and social distancing interventions are applied to control the spread of influenza.

**Results** Simulation based results show that when slum attributes are ignored, the effectiveness of vaccination can be overestimated by 30%-55%, in terms of reducing the peak number of infections and the size of the epidemic, and in delaying the time to peak infection. The slum population sustains greater infection rates under all intervention scenarios in the network that treats slums differently. Vaccination strategy performs better than social distancing strategies in slums.

**Conclusions** Unique characteristics of slums play a significant role in the spread of infectious diseases. Modeling slums and estimating their impact on epidemics will help policy makers and regulators more accurately prioritize allocation of scarce medical resources and implement public health policies.

### Strengths and limitations of this study

- We show that the unique attributes of slums must be accounted for in understanding the spread and control of infectious diseases.
- We demonstrate that the granularity afforded by the agent-based model enables extraction of subpopulations, and subsets of interactions, to help interpret results.
- This study does not consider age-specific susceptibility or immunity from past infections; all individual persons are assumed to be equally susceptible.
- The disease transmission risk does not change across activity types, e.g. an hour with an infected person at home or at work carries the same risk.
- Co-location based contact time is used as a proxy for physical proximity and short-distance environmentally-mediated transmission.

## INTRODUCTION

1 Main manuscript

2  
3 Infectious disease is one of the leading causes of human morbidity and mortality  
4 worldwide. Reports from Centers for Disease Control (CDC) show that over 200,000  
5 people in the United States (US) are hospitalized with influenza-like illness (ILI)  
6 symptoms each year, and the mortality on average is over 36,000 annually.[1-2] In  
7 Delhi, India, a joint study by CDC, All India Institute of Medical Sciences, and the  
8 National Institute of Virology has shown that ILI cases are present throughout the year,  
9 although they peak in rainy and winter seasons.[3] It carries a significant economic  
10 burden through reduced productivity and high costs of health care.[4-7] A CDC study  
11 finds that for outpatient and non-medically attended individuals, acute respiratory  
12 infections cost 1%-5% of monthly per capita income in India. In contrast, cost of  
13 inpatient care can be as high as 6%-34% of monthly per capita income.[8] For  
14 developed countries, the annual cost of influenza is estimated to be between \$1-\$6  
15 million per 100,000 people, according to the World Health Organization.[9]  
16  
17  
18  
19

20 In 2007, India established an Integrated Disease Surveillance Program (IDSP), which  
21 included a network of 12 regional laboratories, to minimize the threat of avian influenza  
22 and other highly infectious zoonotic diseases.[10] India faces some unique challenges  
23 in surveillance, prevention and control because of the seasonality of influenza at sub-  
24 regional levels. This seasonal variation depends upon latitude, monsoon season,  
25 humidity and climatic factors of the regions. Acute respiratory infections are estimated to  
26 be 43 million per year, of which 4-12% are due to influenza.[11-12] Chadha et al.[13]  
27 estimated hospitalizations due to respiratory illnesses to be 160 per 10,000 persons in  
28 year 2011, and children under age 5 had the highest incidence of them.  
29  
30  
31

32 Given that influenza is environmentally-mediated and spreads through close proximity,  
33 population density is an important factor in its spread. In India, the average population  
34 density is about 1000 people per square mile; in the slums, it can be 10 to 100 times  
35 higher.[14] Larger household size and crowding make it easier to transmit  
36 infections).[15-18] For example, Baker et al.[16] find that meningococcal disease risk  
37 among children doubles with the addition of 2 adolescents or adults (10 years or older)  
38 to a 6-room house. Other than overcrowding, slums are characterized by their lack of  
39 medical services,[19-20] which makes slum residents highly vulnerable to infectious  
40 diseases. Diseases like cholera, malaria, dengue and HIV are common in slums across  
41 the world.[21-23]  
42  
43  
44

45 This research uses Delhi, the National Capital Territory of India, where 13% of its 13.8  
46 million people live in slum areas, as an example city to study the spread and control of  
47 influenza. Delhi is an interesting case study. It ranks fourth in the world in urban  
48 population, and, among the top 25 largest urban areas, it ranks tenth in population  
49 density. Although Delhi is our target population, the results are likely to be useful in  
50 studying other slum areas within and outside of India because of the wide range of  
51 intervention types and parameter values examined.  
52  
53

54 This paper is an extension of the work done in Chen et al.[4], which shows that slum  
55 populations have a significant effect on influenza transmission in urban areas. Ignoring  
56 the influence of slum characteristics underestimates the speed of an outbreak and its  
57  
58  
59  
60

1 Main manuscript  
2  
3

4 extent. However, Chen et al.[4] do not consider any interventions on the epidemic  
5 spread. *The focus of this research is to study the effect of different intervention*  
6 *strategies on several subpopulations (slum, age and gender) in two different Delhi*  
7 *networks, i.e., original (referred to as Network 1) and refined (Network 2).*  
8

9 The original network used in Xia et al.[24] studied the spread and control of influenza in  
10 Delhi using Network 1, which did not take into account the special attributes of the slum  
11 population, such as larger family sizes and different types of daily activity schedules.  
12 Chen et al.[4] used Network 2, the refined social network of Delhi, which accounted for  
13 slum demographics and slum activities, but did not study intervention strategies. In  
14 Network 2, there are 298 slum regions in Delhi, containing about 1.8 million people.  
15  
16

17 The goals of this work focus on understanding the effects of pharmaceutical and non-  
18 pharmaceutical interventions on epidemic outcomes. Pharmaceutical interventions (PI)  
19 include vaccinations, and non-pharmaceutical interventions (NPI) are social distancing  
20 measures such as school closure, quarantine and staying home. These effects are  
21 studied comparatively: (i) in Network 1 versus Network 2, overall and for subpopulations  
22 in each; and (ii) in the slum and non-slum regions of Network 2. Additionally, in a  
23 scenario where interventions can be applied to a limited number of individuals, we  
24 explore how resources should be split between slum and non-slum subpopulations in  
25 order to achieve the best outcomes with respect to total infection rate (i.e., the  
26 cumulative fraction of a population infected).  
27  
28  
29

## 30 METHODS 31

32 We use an agent-based modeling (ABM) approach to simulate the spread and  
33 containment of influenza in social contact networks of Delhi, India. We compare two  
34 networks: one considers slum-specific attributes, and the other does not. In this section,  
35 we describe the networks, the disease model for each agent, the interventions, and the  
36 heterogeneities of the problem that make ABM uniquely suited to study epidemics.  
37 Throughout this manuscript, each agent in the ABM is an individual human.  
38  
39  
40

41 **Social Contact Networks:** This study uses two synthetic social networks of Delhi,  
42 created in Xia et al.[24] and in Chen et al.[4]. Details on their construction can be found  
43 in Xia et al.[24], Chen et al.[4], Barrett et al.[25], Bisset et al.[26] and references therein.  
44 The synthetic social network by Xia et al.[24] is called *Network 1*, and the more refined  
45 network developed in Chen et al.[4], *Network 2*.  
46  
47

48 It is important to note that while the social contact networks are inputs in  
49 epidemiological simulations, these networks are not specified directly. Rather, these  
50 networks are the outputs of population generation methods that are overviewed below  
51 and cited immediately above, and include activity surveys and demographic data, both  
52 inside and outside of slums. Thus, the topologies of the networks arise from the  
53 population generation process, and its inputs.  
54  
55  
56  
57  
58  
59  
60



1 Main manuscript

2  
3 Network 1 was developed in part from Land Scan and Census data for Delhi, a daily set  
4 of activities of individuals, and the locations of those activities including geo-locations of  
5 residential areas, shopping centers, and schools, collected through surveys by  
6 MapMyIndia.com. By assigning activity locations to individuals' activities, people are  
7 located at particular times at particular geographic coordinates (including office  
8 buildings, schools, etc.) and within particular rooms of buildings. Next, contacts between  
9 individuals are estimated when each person is deemed to have made contact with a  
10 subset of other people simultaneously present at the same location. This gives rise to a  
11 synthetic social contact network where network edges represent these contacts.  
12  
13

14  
15 Network 2 models the slum regions in Delhi and assigns slum-specific attributes to the  
16 individuals whose homes reside in the slum polygons. Slum residents' attributes and  
17 their daily sets of activities are collected through a ground survey in Delhi slums, by a  
18 vendor, Indiamart ([www.Indiamart.com/trips](http://www.Indiamart.com/trips)). The slum polygons are obtained from  
19 *MapMechanic.com*. Individuals living in the slum regions are a part of the slum  
20 population. All other individuals are part of the non-slum population. Network 2 is a geo-  
21 located, and contextualized social contact network of Delhi with slums integrated in it.  
22  
23

24  
25 Following are the main differences between the original network (Network 1) and the  
26 refined network (Network 2). The original social contact Network 1 treats the slum  
27 regions like any other region in Delhi in terms of assignment of demographics and  
28 individual activities, i.e. no special consideration is given to slum residents. The refined  
29 Network 2 identifies 298 slum polygons (zones) in Delhi and assigns slum-specific  
30 demographics and activities to the individuals whose homes reside inside these  
31 polygons. Thus, the number of individuals is the same in both populations. The slum  
32 population constitutes about 13% (1.8 million) of the entire Delhi population of 13.8  
33 million people. The main effects of integrating slums is that Network 2 has more home-  
34 related contacts due to larger family sizes and more outside contacts due to more daily  
35 activities outside home. Also, those individuals who reside outside of slum zones have  
36 the same activities in both networks (but their contacts may change if their interactions  
37 include slum residents). Overall, there are over 231 million daily interactions between  
38 pairs of individuals. Table S1 compares those two networks as well as data sources for  
39 slum and non-slum Delhi, India. (Table and figure numbers that are prefixed with 'S' are  
40 in the supplementary information (SI)). For example, the average degree increases from  
41 30.4 to 33.4 from Network 1 to Network 2, and the maximum degree increases from 170  
42 to 180. We refer to Chen et al.[4] for more detailed information about the two networks.  
43 Several plots of properties and structural characteristics of Networks 1 and 2 are given  
44 in Chen et al.[27].  
45  
46  
47  
48

49 **Disease Model:** An SEIR, Susceptible (S), Exposed (E), Infectious (I) and Removed or  
50 Recovered (R) model is considered within each individual. Each node in the network  
51 represents an individual, and each edge represents a contact on which the disease can  
52 spread. A contact represents possible transmission between two people that are co-  
53 located for some duration (based on their activity schedules). This is an approximation  
54 to model direct contact and short-distance environmentally-mediated transmission that  
55 might include direct physical contact, fomite mediated, and airborne transmission.[28]  
56  
57  
58  
59  
60

1 Main manuscript  
2  
3  
4

5 We start each epidemic simulation with 20 index cases, randomly chosen. (We find that  
6 results are not sensitive to the number of initial infections.) The detailed description of  
7 the SEIR model as well as the choices of transmissibility value,  $R_0$ , the explicit  
8 incubation and exposed periods can be found in the supplementary information. This  
9 disease model has been used in other works such as Liao et al.[29], Marathe et al.[30].  
10

11 The transmissibility value for disease transmission is that for the strong influenza model  
12 in Chen et al.[4]. That work used mild, strong, and catastrophic influenza models, so we  
13 chose the intermediate transmissibility. This corresponds to base attack rates (i.e.,  
14 cumulative infection fractions) of 0.42 and 0.48, respectively, in Networks 1 and 2.  
15 These rates are generally higher than those in some other studies that either compute  
16 experimental attack rates from cases or compute them in modeling studies such as this  
17 one. Attack rates used by past researchers for different strains of influenza include Asia  
18 [0.22 to 0.50],[31] Southeast Asia [0.11 to 0.31 in children [32]; 0.05 to 0.65 [33]], and  
19 India [0.111 to 0.235 [34]; 0.074 to 0.424 [35]; 0.045 to 0.294 [36]; 0.008 to 0.100 [37];  
20 0.209 for various strains [13]]. The results of Chen et al.[4] indicate that the results here,  
21 for this particular transmissibility, will be qualitatively the same for other  
22 transmissibilities, but will scale down or up as transmissibility changes in the same  
23 direction.  
24  
25  
26  
27

28 **Interventions:** This work considers three vaccination scenarios, i.e., vaccinate when  
29 cumulative infection rate is 0% (VAX0, i.e. vaccinate on day 1), 1% (VAX1), and 5%  
30 (VAX5). Three classes of social distancing strategies are considered: (i) stay-home  
31 (SHO) if infected, i.e. eliminate all non-home related contacts but continue to maintain  
32 contacts within the household; (ii) close-schools when cumulative infection rate has  
33 reached 1% (CS1) and when it has reached 5% (CS5), i.e. eliminate school related  
34 contacts; and (iii) (ISO), in which all contacts, including home contacts, of a person are  
35 eliminated when a person becomes infectious. For vaccination, five different compliance  
36 rates (10%, 30%, 50%, 70%, 90%) and two different vaccine efficacies (30% and 70%)  
37 are considered.  
38  
39  
40

41 VAX0, SHO, ISO are all fairly aggressive interventions because they are implemented  
42 either before a person gets infected or immediately upon becoming infectious. These  
43 are actions taken at the individual or family level. For example, vaccination before the  
44 influenza season or isolating a sick child at home are family decisions. Even CS1 is an  
45 aggressive intervention in the sense that this action is taken by government officials  
46 based on aggregate school sickness levels—closing schools before any outbreaks is  
47 typically not done. From these starting points, vaccinations when 1% or 5% of the  
48 population is infected (VAX1, VAX5), and closing schools when 5% of the population is  
49 infected (CS5) are less aggressive treatments. The five levels of compliance are also  
50 variations on aggressiveness in treatments.  
51  
52  
53

54 These conditions and parameters are consistent with results from other studies and  
55 guidelines put out by international organizations. A meta-study of immunization and  
56 slums [38] identifies several vaccination-related studies of slums in India. Unfortunately,  
57  
58  
59  
60

1 Main manuscript

2  
3 these studies are for other diseases such as Hepatitis B, measles, mumps, malaria, and  
4 typhoid fever. Nonetheless, slum vaccination rates for children over these ailments  
5 range from 25% to 69% for full immunity and from 15% to 55% for partial immunity.  
6 Vaccination effectiveness for influenza-like illness (ILI) in India was determined to be  
7 about 33% to 36%.<sup>[39]</sup> In 2012-2013, of 1000 pregnant women in Srinagar India, none  
8 were vaccinated against influenza.<sup>[40]</sup> With regard to school closures, the World Health  
9 Organization (WHO) states that school closures may be undertaken proactively (before  
10 an outbreak) or reactively (after influenza starts to spread).<sup>[41]</sup> WHO recommends that  
11 school closure occur before 1% of the population becomes infected. It also  
12 recommends that people (students and staff) stay home when they feel ill. In another  
13 meta-study<sup>[42]</sup>, it was found that school closure, effected when 0.1% of the population  
14 was infected, was twice as effective in reducing the total attack rate as school closure  
15 occurring after 1% of the population was infected. Moreover, the percentage of people  
16 infected before school closure was triggered varied between 0.02% to 10% across  
17 several studies.

18  
19 When a susceptible node is vaccinated, its probability of getting infected by an  
20 infectious node is scaled down by the efficacy. If it becomes infectious, its probability of  
21 infecting susceptible nodes is also scaled down by the efficacy. In other words, both  
22 incoming and outgoing infection probabilities of vaccinated individuals are reduced by  
23 the vaccine efficacy. Interventions are applied to slum residents, non-slum residents,  
24 and the entire region of Delhi.

25  
26 For each experiment, 25 replicates are simulated for 400 days, and their mean results  
27 are reported. The averages are time-point wise averages, e.g. the mean infection rate at  
28 day 100 is calculated by taking the average of the 25 infection rates that occur on day  
29 100 of each replicate. Table S2 summarizes all the interventions considered, and Table  
30 S3 contains all variables in simulations, including intervention parameters.

31  
32 **Heterogeneities captured:** There are several heterogeneous aspects to this problem  
33 that motivate the use of an ABM approach: (i) the 298 slum zones have populations that  
34 vary by more than four orders of magnitude in size; (ii) the geographic extent of slum  
35 zones differ; (iii) the slum zones are located at irregular spatial intervals throughout  
36 Delhi; (iv) the activity patterns of people living in slums are different from those in the  
37 non-slum region; and (v) each individual interacts with specific others based on co-  
38 location.

39  
40 The implications of these heterogeneities include the following. First, the particular  
41 synthetic households that live within slums are predicated on the number of slum zones,  
42 their locations, and their spatial geometries. These homes have larger family size and  
43 hence more home contacts. Second, slum individuals have different activity patterns  
44 which change the co-located contacts of each slum person: that is, with whom they  
45 interact and for how long. For example, see the supplemental information of Chen et  
46 al.<sup>[27]</sup>. The average total contact durations by activity type and by slum/non-slum  
47 residents are provided, which show that non-slum people have greater contact  
48 durations for work, school, and college activities, but less for home and other types.

1 Main manuscript  
2  
3

4 Overall, a slum person has about 50% greater total contact duration per day compared  
5 to a non-slum person. The same supplemental shows that in the age range 20 to 60  
6 years (by year), females that live in slums have more contacts per day than their male  
7 counterparts. However, females whose homes are outside of slum regions have  
8 average number of daily contacts that are below their male counterparts.  
9

## 10 11 **RESULTS AND ANALYSIS**

12 Our results are grouped as follows. (1) Comparison of Network 1 and Network 2 for  
13 base case and intervention cases. (2) Results for both networks based on demographic  
14 classes, such as slum/non-slum, gender, and age groups, for a wider range of  
15 intervention strategies. (3) Comparison of Network 1 with the non-slum population of  
16 Network 2. (4) Effects of pharmaceutical and non-pharmaceutical interventions for a  
17 wide range of parameter values. (5) Effects of different resource allocation strategies.  
18  
19

20 All differences are tested with the two-sample t-test and they are all statistically  
21 significant with p-values smaller than  $2.2e-16$ . The 95% confidence intervals are given  
22 for each comparison. Here is a brief summary of selected results with examples of  
23 mechanisms, to provide a high-level overview. Details of results follow this summary  
24 and these details matter because there are many factors (inputs) in a simulation whose  
25 interactions change results.  
26  
27  
28

29 (1) Ignoring the unique attributes of slums in a population overestimates the benefits of  
30 the interventions. For example, in the case of vaccination intervention (efficacy 30% and  
31 compliance 30%), the values for the epidemic size (i.e., cumulative percentage of  
32 infected), peak infection rate (i.e., maximum percentage of a population infected on any  
33 day), and time to peak are 33.1%, 3.0%, and 184 days, respectively, in Network 2,  
34 whereas they are 23.3%, 1.34%, and 286 days in Network 1. In relative terms, the  
35 epidemic size and peak infection rate are underestimated by 42.2% and 123.2%  
36 respectively, while the time to peak is overestimated by 35.7% in Network 1 (see  
37 Figures 1, 2 and Table S4). The larger family sizes for slum families in Network 2 and  
38 the increased number of edges result in larger outbreaks and faster time to peak  
39 infections.  
40  
41  
42

43 (2) Interventions are more effective in Network 1 than Network 2 for all types of  
44 interventions: vaccination, closing schools, staying home, and isolation. These trends  
45 also hold over wide ranges of efficacy and compliance (see Figures 3, 4, S1, S2 and  
46 S3). Hence, not accounting for slums gives overly optimistic results for the effectiveness  
47 of the interventions. The reduced average family size in Network 1 means fewer within-  
48 home edges, which slows infection and reduces spreading. Closing schools and staying  
49 home interventions do not affect home edges. However, the magnitude of this effect  
50 varies with intervention conditions (e.g., compliance rate, time at which intervention is  
51 applied).  
52  
53  
54

55 (3) Cumulative infection rates by subpopulation in Network 2 show that slums sustain  
56 greater infection rates than non-slums under all intervention scenarios, sometimes by as  
57  
58  
59  
60

1 Main manuscript  
2

3 much as 44.0%. See Figure 4 and Table S5 for more details. This is due to the greater  
4 household sizes in slums.  
5

6  
7 (4) For Network 2, under a wide range of intervention compliance rates (10% to 90%),  
8 the isolation strategy is up to 32% more effective in containing an outbreak than  
9 vaccination (for 30% efficacy). Staying home is up to 18% more effective than  
10 vaccination at 50% compliance. See Figure 3 and Table S6 for more details. Isolation,  
11 although hard to implement from practical considerations, is most effective because  
12 edges to susceptible individuals are removed (isolation also provides a good  
13 comparative case). Differences between staying home and vaccination depend on  
14 compliance rates.  
15

16  
17 (5) For Network 2, delay in triggering interventions has 7.3% to 44.0% more adverse  
18 effect in slums than in non-slum regions across compliance rates from 10% to 90%. See  
19 Figure 4 and Table S7 for more details. Early interventions mean actions are taken  
20 when outbreaks are smaller and are therefore more readily contained.  
21

22  
23 (6) Comparison of Network 1 (Figure 3a) with the non-slum population (Figure 4b) of  
24 Network 2 shows that just the presence of slum specific activities and interactions with  
25 non-slum population makes social-distancing based interventions less effective in the  
26 non-slum regions of Network 2.  
27

28  
29 (7) A full-factorial design that splits resources between slum and non-slum regions  
30 indicates that the most effective intervention is to give vaccines to slums and apply  
31 social distancing to non-slums. Applying vaccine and social distancing to slum regions  
32 is the next most effective intervention. See Figure 5. By applying social distancing to  
33 non-slums, these individuals are kept isolated from slum individuals that are infected.  
34 The greatest benefits accrue to the slum populations.  
35  
36

### 37 38 39 **Comparison between Networks 1 and 2: Base case versus interventions**

40  
41 We start with a comparative analysis of the influenza epidemic, with and without  
42 interventions, on Network 1 and Network 2, to measure the impact of integrating slums  
43 in the population on epidemic measures. Figure 1 shows the average simulation time  
44 histories for the base case, and when vaccination is applied randomly to 30% of the  
45 population in each network with vaccine efficacy set at 30%. Mean infection rate is the  
46 daily fraction of infected individuals. It is the time-point wise average over 25  
47 simulations. For example, the mean infection rate at day 100 is calculated by taking the  
48 average of all 25 infection rates. Simulations for other vaccine efficacies and  
49 compliance rates give qualitatively similar results. Two sets of those results are shown  
50 in the supplemental information, see Figures S1 and S2. Note that Network 1 does not  
51 distinguish between slum and non-slum individuals, so the epidemic curve is not split by  
52 subpopulation.  
53  
54  
55  
56  
57  
58  
59  
60

1 Main manuscript  
2  
3

4 Results in Network 2 differ significantly from results in Network 1 for both the base case  
5 and intervention case. In Network 2, the epidemic starts earlier, peaks earlier, has a  
6 larger epidemic size and has higher peaks compared to the corresponding epidemic  
7 quantities in Network 1. Thus, if policy planners ignore slums and use Network 1 to  
8 plan, there will be a false sense of security and lack of urgency to implement  
9 interventions. For both the base case and the intervention case, ignoring unique  
10 characteristics of the slums will result in an underestimation of the infections and the  
11 speed of spread.  
12

13  
14 Figure 1 goes here  
15

16  
17 For the intervention cases, the time to peak infection decreases by 35.7%, i.e. from 286  
18 days for Network 1 to 184 days for Network 2, meaning an influenza epidemic would  
19 peak roughly 100 days earlier than one would expect based on the results from Network  
20 1. For the base case, time to peak infection drops by 20.8%, i.e. 34 days reduction for  
21 Network 2 as compared to Network 1.  
22

23  
24 Percentage changes and differences must be viewed cautiously, and to illustrate this  
25 point, we present data for the key parameters in Tables S4 and S8. The difference in  
26 the peak infection rate (i.e., the maximum fraction of daily infected individuals during the  
27 simulation) between Networks 1 and 2 for the base case is 2.2%, or 47.6% in  
28 percentage change (see Table S8). For the intervention case shown in Table S4, the  
29 difference between the two networks is less (1.7%), but the percentage change is more  
30 (123.2%) because the magnitudes of the peak infection rates are reduced when  
31 effective interventions are used. We make note of this here and mainly use the  
32 percentage change values in discussing results. For more detailed comparison between  
33 vaccination intervention and the base case in Network 1 and Network 2, we refer to  
34 Tables S7 and S9 and Figures S4 and S5.  
35  
36  
37  
38

### 39 **Comparison between Networks 1 and 2 based on individual demographic** 40 **information** 41

42  
43 We divide the Delhi population into strata by age, gender, and geographic home  
44 location (i.e., slum and non-slum), and analyze mean cumulative infection rates by  
45 subpopulation for the two networks. In simulations, individuals are chosen at random in  
46 the entire network for vaccination. Various vaccination scenarios are investigated.  
47  
48

49 Figure 2 displays the cumulative infection rate results. On the x-axis, 'Total' refers to the  
50 entire population of Delhi. There are three breakdowns of the entire population. 'Slum'  
51 and 'Non-slum' refer to slum and non-slum regions, respectively. 'Male' and 'Female'  
52 denote the total number of males and females in Delhi, respectively. Four age groups  
53 are considered: 'Preschool' (0-4), 'School' (5-18), 'Adult' (19-64), and 'Senior' (65+). The  
54 black lines correspond to the mean cumulative infection rates for the base case. Other  
55 curves indicate vaccination strategies under different levels of vaccination rate ( $v$ ) and  
56  
57  
58  
59  
60

1 Main manuscript

2  
3 vaccine efficacy ( $\alpha$ ). Two vaccination rates (30%, 50%) and two vaccine efficacy rates  
4 (30%, 70%) are shown in the figure.  
5

6  
7 For Network 1, vaccination rate of 50% or higher stops the epidemic for all categories of  
8 individuals, regardless of vaccine efficacy. An efficacy of 70% also contains the  
9 epidemic, given a vaccination rate of at least 30%. In comparison, for Network 2, either  
10 a vaccination rate of 70% is required (not shown in plot for clarity) or a vaccination rate  
11 of 50% combined with a vaccine efficacy of 70% is required to stop the epidemic for all  
12 categories of individuals.  
13

14  
15 In Network 1, slum and non-slums are treated the same so the infection rates are  
16 identical in Figure 2. However, all scenarios in Network 2 show a higher burden of  
17 disease on the slum population. This is due to the fact that slum households have larger  
18 family size and more contacts on average than households in non-slum areas, see  
19 Chen et al.[27] As shown later, we find similar patterns of infection in slum and non-  
20 slum subpopulations for other interventions such as 'close-schools' and 'stay-home'.  
21  
22

23  
24 The results in both Figure 1 and Figure 2 indicate that ignoring the effect of slums  
25 results in overestimation of the benefits of interventions in terms of reduction in the  
26 mean cumulative infection rate and peak infection rate, as well as the time to peak. This  
27 optimism holds for slum, non-slum and total population under various levels of  
28 vaccination rates and efficacy rates in Network 2. See Table S10 for more detailed  
29 comparison of results between slum and non-slum in Network 2.  
30

31  
32 Figure 2 goes here  
33

### 34 35 **Comparison between Networks 1 and 2 across a wide range of intervention** 36 **strategies** 37

38  
39 Next, we consider a variety of intervention strategies for comparative analysis. We  
40 consider vaccination, school closure, stay home, and isolation strategies. For vaccines,  
41 three different trigger points are considered: when cumulative infection rate reaches 0%  
42 (VAX0), 1% (VAX1) and 5% (VAX5). For close-schools, two trigger points are used:  
43 when the cumulative infection rate reaches 1% (CS1), and 5% (CS5). Under the stay at  
44 home (SHO) strategy, all non-home activities and interactions are eliminated but all  
45 contacts within the household are maintained. Under isolation (ISO) an individual has  
46 no contact with other individuals (even home interactions are eliminated). The stay-at-  
47 home and isolation interventions are implemented for compliant infectious individuals,  
48 after they become infectious, for the entire infectious duration.  
49  
50

51  
52 Figure 3 displays average cumulative infection rates in Network 1 and Network 2 for a  
53 wide range of intervention strategies. For each strategy, five different compliance rates  
54 are considered, i.e., 10%, 30%, 50%, 70% and 90%. The cumulative infection rates  
55 (i.e., fractions) are displayed as larger numbers in boxes, while smaller-font numbers  
56 are the actual number of infected individuals. Darker colors correspond to higher  
57 infection rates. Note that compliance rate is simply the vaccination rate for strategies  
58  
59  
60

1 Main manuscript  
2

3 VAX0, VAX1 and VAX5. Compliant individuals are selected at random from the entire  
4 population. The 'Base' values do not vary with compliance because the base case has  
5 no intervention. Note that all heat maps in this paper use the same color scheme so that  
6 colors can be compared across figures.  
7

8  
9 Since Network 1 does not distinguish between slum and non-slum populations, we only  
10 compare the two networks for the whole of Delhi. The general pattern is similar for both  
11 networks. However, all interventions have a larger effect on Network 1 under the same  
12 compliance rate (that is, corresponding numbers are uniformly lower for Network 1 than  
13 for Network 2). The infection rates drop to zero at a smaller compliance rate for VAX0,  
14 stay-home, and isolation strategies in Network 1 as compared to those for Network 2.  
15  
16

17 Figure 3 goes here  
18  
19

20  
21 At a high level, among all intervention strategies, early vaccination (VAX0 and VAX1),  
22 social isolation (ISO), and stay home (SHO) are more effective than the other  
23 strategies, and this is more readily observed at higher compliance rates. For these  
24 more effective strategies, the interventions per person are implemented right after (or  
25 very shortly after) the person is infected. For example, SHO is implemented  
26 immediately after a person becomes infectious. Thus, a person that becomes infectious  
27 can infect their family members, but if these other members become infectious, then  
28 they, too, will be confined to home. Thus, home-bound people can infect their family  
29 members, but no one beyond their family (for 100% compliance). As compliance rate  
30 increases, this effect approaches, roughly, a "family-based" isolation intervention  
31 (similar to ISO), consistent with the results in Figure 3 and in subsequent results.  
32  
33  
34  
35  
36

### 37 **Effect of vaccination versus social distancing on slum and non-slum** 38 **subpopulations** 39

40 We now compare the impact of vaccination and social distancing on slum and non-slum  
41 subpopulations from Network 2. Social distancing interventions are close-schools, stay-  
42 home, and isolation.  
43  
44

45 The mean cumulative infection rates (and actual numbers of infections underneath) for  
46 each compliance level are shown in the heat maps in Figure 4 for slum and non-slum  
47 populations in Network 2. The axis labels are identical to those in Figure 3, as is the  
48 color scheme of the cells. The base case values are constant since there is no  
49 intervention and hence no compliance. Darker colors correspond to higher infection  
50 rates.  
51  
52

53 Compared to the base case, all interventions reduce infection rates to some extent. As  
54 the compliance rate increases, infection rates drop for all interventions. Infection rates  
55 drop to zero in slum and non-slum regions at a compliance level of 70% or higher,  
56  
57  
58  
59  
60



1 Main manuscript

2  
3 under SHO, ISO, and VAX0 strategies. Early interventions or lower trigger levels reduce  
4 the infection rates significantly, and this effect increases with compliance rate.  
5

6  
7 The following observations can be made from Figure 4. Social distancing, i.e. SHO, at  
8 low and intermediate compliance and CS at all compliance levels, are less effective in  
9 slum regions as compared to non-slum regions. This is because CS only eliminates  
10 school interactions for those attending school, and there are fewer school edges in  
11 slums compared to non-slum areas, as shown in Figure S6. The effectiveness of CS in  
12 slums is mitigated by the greater average number and duration of interactions at home  
13 in slums as compared to non-slums (see Figure S6 and Chen et al.[27]). Thus, if a  
14 person is sick, there is a greater chance of transmitting contagion to family members,  
15 who then may have activities outside of school, thus circumventing the CS intervention.  
16 At high compliance, SHO is effective because all interactions outside home (including  
17 school) are eliminated.[27]  
18  
19

20  
21 These observations are also supported by Figure S7, which contains numbers of edges  
22 used to transmit contagion for a base-case run of Figure 1. There are several effects  
23 that bear on the above observations. First, in the cases of activities “work”, “other”, and  
24 “school”, the number of edges transmitting contagion from slums to non-slums is greater  
25 than the reverse: from non-slum to slum. Second, in two of these three activity  
26 categories, there is more slum to non-slum transmissions than slum to slum  
27 transmissions. Edges of transmission for slum dwellers is dominated by home  
28 interactions. The infected homes in slums serve as launching points to drive disease to  
29 non-slums through slum to non-slum interactions. (There are no “mixed” edges at  
30 homes, and shopping and college activities have low levels of slum activity because of  
31 socio-economic factors.) We will see the effects of these mechanisms in Figure 5, but  
32 we now return to Figure 4.  
33  
34  
35

36 Isolation works well at 30% or higher compliance rates, but it is a much harder strategy  
37 to implement, especially in slums. However, it is considered here for comparative  
38 analysis. Vaccination also produces marked decreases in cumulative outbreak sizes as  
39 compliance increases. However, close-school is generally less effective because this  
40 intervention removes only a fraction of interactions for a fraction of the population, i.e.  
41 school aged children. Simulations were also run for 70% vaccine efficacy. Since results  
42 are qualitatively similar for those parameters, these plots are provided in Figure S3.  
43  
44  
45

46 Figure 4 goes here

## 47 48 49 **Comparison between Network 1 and non-slum areas of Network 2**

50  
51 Note that Network 1 treats all parts of the region as non-slum, i.e. all individuals follow  
52 non-slum activities and demographics. In order to capture the additional disease risk to  
53 the non-slum population that arises from the interactions with the slum population, we  
54 compare Network 1 in Figure 3a with the non-slum population of Network 2 in Figure 4b.  
55 In base case, the additional disease risk to the non-slum population goes up from 42%  
56 to 45%. However, the beneficial effects of social distancing strategies drop by a large  
57  
58  
59  
60

1 Main manuscript

2  
3 amount, e.g. close school strategies are 5-20% less effective in the non-slum areas of  
4 Network 2. This effect changes non-linearly with the compliance rate. As compliance  
5 rate goes up, the difference between performance of Network 1 and non-slum parts of  
6 Network 2 goes up in CS1 and CS5. This implies that in Network 2, non-slum population  
7 requires much higher levels of compliance to achieve the same results as in Network 1.  
8 This difference is less stark for vaccination based interventions, i.e. VAX0, VAX1 and  
9 VAX5. This is expected since the effect of vaccination is less dependent on interactions;  
10 it is only through herd immunity that interactions come into play.  
11  
12

### 13 **Constrained resource allocation among slum and non-slum areas**

14  
15 We consider a specific scenario under Network 2. If only a limited number of vaccines  
16 are available, and only a certain fraction of individuals can be kept home during an  
17 epidemic, how should these interventions be applied to the slum and non-slum regions  
18 so that the epidemic can be controlled effectively? Given that slum residents' attributes  
19 differ from those of non-slum residents, is there a strategy that works better in slums  
20 than in non-slum areas? The total population in Delhi is about 13.8 million, which  
21 includes about 1.8 million slum residents. We assume that only 10% of the total  
22 population can be covered by interventions, half through vaccination and the other half  
23 through stay home. Enough vaccines are available to cover 5% of the total population  
24 (i.e. 692,183 vaccinated, corresponding to about 38.25% of slum or 5.75% of non-slum  
25 population), and 5% of the individuals can stay home (692,183 individuals; this is  
26 applied to only the infected individuals). Note that an individual may receive a vaccine  
27 and also stay at home if this individual, in spite of being vaccinated, gets infected.  
28  
29  
30  
31  
32

33 We consider 4 different ways of applying interventions to 10% of the total population: (i)  
34 apply both interventions to slums, i.e. give all vaccines to slums and apply SHO only in  
35 the slums (VsSs); (ii) apply all interventions to non-slum areas (VnSn); (iii) give vaccines  
36 to slums and SHO to non-slums (VsSn) and (iv) give vaccines to non-slums and apply  
37 SHO to slums (VnSs).  
38  
39

40 For both types of intervention, the same number of individuals is chosen randomly from  
41 slum or non-slum areas. 10% of the total Delhi population amounts to 76.5% of slum  
42 population, 11.5% of the non-slum population, or a combination of 38.25% of the slum  
43 and 5.75% of the non-slum population (i.e. half from slums and half from non-slums).  
44 Figure 5 shows the mean cumulative infection rates, as well as the number of infected  
45 from the entire population of Delhi, the slums, and non-slum areas under each of the  
46 four scenarios. The first 3 columns refer to Network 2 and the last column shows results  
47 for Network 1. Since Network 1 does not distinguish between slum and non-slum areas,  
48 the infection rates in each subpopulation remain the same as for the total population.  
49  
50  
51

52 Comparison of the last two columns in Figure 5 indicates that the non-slum population  
53 in Network 2 faces 3-5% additional disease risk compared to Network 1 in all cases.  
54 This is primarily driven by the increased interactions within slum populations and  
55 between slum and non-slum populations in Network 2.  
56  
57  
58  
59  
60

1 Main manuscript  
2  
3

4 In Figure 5, all four intervention strategies produce essentially the same total attack  
5 rates (around 43% to 44%), a drop of 4% to 5% over the base case. The dominant  
6 effect on Network 2, is the benefits that primarily accrue to the slum population for the  
7 VsSs and VsSn strategies because they drive down the fraction of infected slum  
8 residents from 0.74 to 0.55 or 0.58. Also, as described in the context of Figures 4 and  
9 S6 above, social distancing of the non-slum residents helps to isolate them from the  
10 infected slum residents. Results such as these may be helpful to policy makers in  
11 breaking the poverty trap in economically poor regions.[43]  
12

13  
14 Also, the strategy of vaccinating non-slums and social distancing slums (VnSs) is not as  
15 effective as the interventions in rows 1 and 2 of Figure 5. This is a counterintuitive  
16 result, since the density of population is much higher in the slums, which may lead to  
17 the belief that social distancing in slums will break up the dense clusters. However, a  
18 careful examination shows that keeping slum residents home is not an effective social  
19 distancing strategy because their family size is, on average, almost 3 times the family  
20 size of non-slum households.[27] The high level of mixing at home makes social  
21 distancing ineffective in slums unless the infected individual is completely isolated.  
22 However, complete isolation is not viable in slum areas where the entire household may  
23 live in a single room.  
24  
25  
26  
27  
28

29 Figure 5 goes here  
30  
31

## 32 DISCUSSION 33

34 With slum populations expected to grow to 2 billion by 2030,[44] it is becoming  
35 increasingly urgent to understand how to control the spread of infectious diseases in  
36 slum areas and measure its effect on urban populations. To our knowledge, a detailed  
37 study of interventions to control influenza epidemics in slums, using an agent-based  
38 simulation model, has never been done before. Slum conditions are important for a city  
39 beyond the direct effects of disease transmission. For example, civil wars may be  
40 precipitated or exacerbated by disease outbreaks because they decrease social health  
41 and welfare.[45]  
42  
43  
44

45 Even though slum regions contain only 13% of the total population of Delhi, Chen et  
46 al.[4] show that omitting their attributes leads to underestimation of the overall infection  
47 rate and the peak infection rate of the epidemic. This paper extends that work by  
48 evaluating the differential impact of interventions on slum and non-slum regions.  
49 Various vaccination and social distancing strategies are analyzed under different  
50 scenarios that show that the slum population is more prone to infections under the same  
51 control measures. Furthermore, taking account of slum populations significantly alters  
52 the disease dynamics in the *entire* population. Differences in key measures are  
53 demonstrated between the cases of accounting for slum populations and not: e.g., a  
54 100% increase in the peak attack rate in some cases when slum regions' characteristics  
55 are taken into account, compared to the case when they are ignored.  
56  
57  
58  
59  
60

## Main manuscript

1  
2  
3  
4  
5  
6  
7  
8  
9  
10  
11  
12  
13  
14  
15  
16  
17  
18  
19  
20  
21  
22  
23  
24  
25  
26  
27  
28  
29  
30  
31  
32  
33  
34  
35  
36  
37  
38  
39  
40  
41  
42  
43  
44  
45  
46  
47  
48  
49  
50  
51  
52  
53  
54  
55  
56  
57  
58  
59  
60

Figure 4, which compares infections in slum with non-slum areas, shows that at very high compliance rates, some interventions can be equally effective in both slums and non-slums. However, such high compliance rates are typically not feasible due to practical realities on the ground, and also because they require timely diagnosis of infected cases. For SHO to be effective, the coverage rate needs to be 70% or more in both slums and non-slums, and the diagnosis of the infected individuals needs to be correct and immediate. In other words, effective control of a contagious epidemic in a high-density place like Delhi would require either early and drastic action (e.g. ISO) or a highly compliant set of individuals, or a combination of these features.

This work overall demonstrates the power of agent-based and population modeling to evaluate complicated interaction-based epidemiological phenomena. Clearly, there are limitations to this work (several are itemized below). But these agent and population approaches provide a platform for adding additional complexity. All of the figures demonstrate that quantitative results depend on complicated interplay among inputs. These results are important because they inform policy decisions. An equally important benefit of this type of work, but not often stated, is developing intuition about epidemic dynamics (in this case, with the effects of slums), to enable decision makers to reason about nuanced interactions among effects to a degree that is hard to obtain with other approaches that lack this level of detail. However, we believe that other modeling approaches may also be valuable in understanding epidemic dynamics in slum populations.

Despite the detailed modeling effort, there are limitations of this work and areas for improvement in the future. For example, this model assumes that both slum and non-slum individuals have the same level of immunity. This may not be true for seasonal infections. Previous researchers have argued that individuals who live in smaller family sizes, who have access to household amenities and maintain a high level of personal cleanliness, face declining microbial exposure which can modify their immune response and reduce their level of tolerance to respiratory infections.[46] Slum households characterized by larger family size and overcrowding, are likely to encounter much higher microbial exposure and therefore may be protected by their greater immunity.[16-17]

Areas for future work include: (1) Examination of different population level base attack rates derived from different transmission probabilities. (2) Different susceptibilities and infectivity for individual agents; e.g., based on age. (3) Effects of asymptomatic infections (although we have addressed this to some extent with compliance and efficacy of interventions). (4) Seasonal effects.[47-48] (5) Effects of immunity for an individual from previous infections (in previous seasons). (6) Evaluation of interaction of different strains from season to season. (7) Comparison of tropical versus subtropical factors. (8) Evaluation of a specific outbreak scenario. (9) Impact of sickness on absenteeism from work and its economic ramifications. (10) Effects on rural versus urban populations. (11) Using combinations of interventions rather than one at a time;

## Main manuscript

1  
2  
3 this was only done here in Figure 5. However, to disambiguate results, it is prudent to  
4 first examine individual interventions. (12) Effect of changing disease transmission rate  
5 for different activity types. (13) Effect of changing contact times at different locations.  
6 (14) To capture close-proximity transmission, one could use actual physical proximity.  
7 Here, we use colocation. Finally, just as changes in modeling details can change model  
8 results, so, too, changes in the conditions in actual outbreaks can change results; some  
9 of these factors are listed above. It is essentially impossible to capture all of these  
10 effects—many of which are unknown—down to the level of individual humans.  
11  
12

13  
14 Public health implications: This research demonstrates that modeling slum populations  
15 is important, not only for understanding disease dynamics, but also for designing  
16 effective control measures. Ignoring the influence of slum characteristics on their urban  
17 environment will significantly underestimate the speed of an outbreak and its extent,  
18 and hence will lead to misguided interventions by public health officials and policy  
19 planners. Lessons from this research can be applied in the field and observations  
20 collected from the field can provide valuable data to improve the models and validate  
21 the results. For example, our results show that a slum resident has about 50% greater  
22 total contact duration per day compared to a non-slum resident. This makes social  
23 distancing based interventions more taxing in the slum population. Public health policy  
24 makers may want to subsidize pharmaceutical resources for the slum population to  
25 make them more affordable. Similarly, we find women in slums have a higher number of  
26 contacts per day than their male counterparts whereas in non-slum regions, women  
27 have a fewer number of daily contacts than their male counterparts. This kind of  
28 information can be used to prioritize the distribution of limited resources, e.g. women  
29 could be given preference over males for vaccination in slum areas. This research  
30 provides simulation-based evidence that in general social distancing strategies are  
31 ineffective in slums because of a large number of contacts at home. Unless one applies  
32 complete isolation, which is not feasible in slums, just staying at home still keeps a large  
33 number of contacts and pathways of spread intact.  
34  
35  
36  
37  
38  
39  
40  
41  
42  
43  
44  
45  
46  
47  
48  
49  
50  
51  
52  
53  
54  
55  
56  
57  
58  
59  
60

1 Main manuscript  
2  
3

### 4 **Contributorship statement**

5 AA, SE, CJK, AM, MM, SS, AV designed and conceived the study. SC carried out the  
6 experiments and simulations. SC, CJK, AM performed data analysis. CJK, BL, AM, MM,  
7 EKN, MLW helped with reviewing the results and writing the paper.  
8  
9

### 10 **Competing Interests**

11 There are no competing interests.  
12  
13

### 14 **Funding statement**

15 This work has been partially supported by the Defense Threat Reduction Agency  
16 (DTRA) (grant no. HDTRA1-11-1-0016 and HDTRA1-11-D-0016-0001), National  
17 Institutes of Health (NIH) (grant no. 1R01GM109718) and National Science Foundation  
18 (NSF) (grant no. CCF-1216000, CNS-1011769, and NRT-DESE-154362) (NSF) (grant  
19 no. CCF-1216000, CNS-1011769, and NRT-DESE-154362), NIH Models of Infectious  
20 Disease Agent Study (MIDAS) (grant no. 2U01GM070694-11 and 3U01FM070694-  
21 09S1).  
22  
23  
24  
25  
26  
27

### 28 **Data Sharing Statement**

29 Data pertaining to figures and statistical analysis are partially provided in the  
30 supplementary file, and also can be obtained by contacting the corresponding author  
31 through email.  
32  
33  
34  
35  
36  
37  
38  
39  
40  
41  
42  
43  
44  
45  
46  
47  
48  
49  
50  
51  
52  
53  
54  
55  
56  
57  
58  
59  
60

1 Main manuscript  
2  
3

4 **REFERENCES**  
5

- 6 1. Thompson WW, Shay DK, Weintraub E, Brammer L, Cox N, Anderson LJ,  
7 Fukuda K. Mortality associated with influenza and respiratory syncytial virus in  
8 the United States. *JAMA* 2003 Jan 8;289(2):179-186.  
9  
10 2. Thompson WW, Shay DK, Weintraub E, Brammer L, Bridges CB, Cox NJ,  
11 Fukuda K. Influenza-associated hospitalizations in the United States. *JAMA* 2004  
12 Sep 15;292(11):1333-1340.  
13  
14 3. Chandra N. Influenza viruses circulate in Delhi throughout the year. March 2012.  
15 [http://indiatoday.intoday.in/story/influenza-viruses-circulate-in-delhi-throughout-](http://indiatoday.intoday.in/story/influenza-viruses-circulate-in-delhi-throughout-the-year/1/179252.html)  
16 [the-year/1/179252.html](http://indiatoday.intoday.in/story/influenza-viruses-circulate-in-delhi-throughout-the-year/1/179252.html)  
17  
18 4. Chen J, Chu S, Chungbaek Y, Khan M, Kuhlman C, Marathe A, Mortveit H,  
19 Vullikanti A, Xie D. Effect of modelling slum populations on influenza spread in  
20 Delhi. *BMJ Open* 2016a Sep 1;6(9):e011699.  
21  
22 5. Barrett C, Bisset K, Leidig J, Marathe A, Marathe M. Economic and social impact  
23 of influenza mitigation strategies by demographic class. *Epidemics* 2011 Mar  
24 31;3(1):19-31.  
25  
26 6. Liao S, Ma Y, Chen J, Marathe A. Paid Sick-Leave: Is It a Good Way to Control  
27 Epidemics? International Conference on Complex Sciences 2012 Dec 5 (pp.  
28 213-227). Springer International Publishing.  
29  
30 7. Dorratoltaj N, Marathe A, Lewis B, Swarup S, Eubank S, Abbas K. Cost-benefit  
31 Analysis of Vaccine-based Interventions to Control Pandemic Influenza. 3rd  
32 Conference on Modeling of Infectious Diseases. Institute of Mathematical  
33 Sciences, Chennai, India, November 2015.  
34  
35 8. Peasah SK, Purakayastha DR, Koul PA, Dawood FS, Saha S, Amarchand R,  
36 Broor S, Rastogi V, Assad R, Kaul KA, Widdowson MA, Lal RB, Krishnan A. The  
37 cost of acute respiratory infections in Northern India: a multi-site study. *BMC*  
38 *Public Health* 2015; 15: 330. Published online 2015 April 7.  
39  
40 9. WHO. Influenza vaccines. WHO position paper. *Weekly Epidemiol Record* 2005;  
41 80(33):279-87.  
42  
43 10. Integrated Disease Surveillance Program, Influenza Surveillance Lab Network.  
44 URL: <http://idsp.nic.in/index1.php?lang=1&level=1&sublinkid=5789&lid=3722>  
45  
46 11. Broor S, Krishnan A, Roy DS, Dhakad S, Kaushik S, Mir MA, Singh Y, Moen A,  
47 Chadha M, Mishra AC, Lal RB. Dynamic patterns of circulating seasonal and  
48 pandemic A(H1N1)pdm09 influenza viruses from 2007–2010 in and around  
49 Delhi, India. *PLoS ONE* 2012 Jan 2;7(1):e29129.  
50  
51  
52  
53  
54  
55  
56  
57  
58  
59  
60

## Main manuscript

12. Chadha MS, Broor S, Gunasekaran P, Potdar VA, Krishnan A, Chawla - Sarkar M, Biswas D, Abraham AM, Jalgaonkar SV, Kaur H, Klimov A. Multisite virological influenza surveillance in India: 2004–2008. *Influenza and other respiratory viruses* 2012 May 1;6(3):196-203.
13. Chadha MS, Hirve S, Dawood FS, Lele P, Deoshatwar A, Sambhudas S, Juvekar S, LaFond KE, Mott JA, Lal RB, Mishra AC. Burden of seasonal and pandemic influenza-associated hospitalization during and after 2009 A (H1N1) pdm09 pandemic in a rural community in India. *PloS ONE* 2013 May 15;8(5):e55918.
14. Nijman J. A study of space in Mumbai's slums. *Tijdschrift voor Economische en Sociale Geografie* 2010 Feb 1;101(1): 4-17.
15. Lofgren E, Fefferman NH, Naumov YN, Gorski J, Naumova EN. Influenza seasonality: underlying causes and modeling theories. *Journal of Virology* 2007 Jun 1;81(11):5429-36.
16. Baker M, McNicholas A, Garrett N, Jones N, Stewart J, Koberstein V, Lennon D. Household crowding a major risk factor for epidemic meningococcal disease in Auckland children. *The Pediatric Infectious Disease Journal* 2000 Oct 1;19(10):983-90.
17. Burström B, Diderichsen F, Smedman L. Child mortality in Stockholm during 1885–1910: the impact of household size and number of children in the family on the risk of death from measles. *American Journal of Epidemiology* 1999 Jun 15;149(12):1134-41.
18. Souza LS, Ramos EA, Carvalho FM, Guedes VM, Souza LS, Rocha CM, Soares AB, Velloso LD, Macedo IS, Moura FE, Siqueira M. Viral respiratory infections in young children attending day care in urban Northeast Brazil. *Pediatric Pulmonology* 2003 Mar 1;35(3):184-191.
19. Gulyani S, Bassett EM, Talukdar D. A tale of two cities: A multi-dimensional portrait of poverty and living conditions in the slums of Dakar and Nairobi. *Habitat International* 2014 Jul 31;43:98-107.
20. Acolin A, Chattaraj S, Wachter SM. Urban Governance and Development of Informality in China and India. Informal Real Estate Markets, Eugenie Birch, Shahana Chattaraj and Susan Wachter, eds, University of Pennsylvania Press, Forthcoming. 2014 Aug 18.
21. Madise NJ, Ziraba AK, Inungu J, Khamadi SA, Ezeh A, Zulu EM, Kebaso J, Okoth V, Mwau M. Are slum dwellers at heightened risk of HIV infection than other urban residents? Evidence from population-based HIV prevalence surveys in Kenya. *Health Place* 2012 Sep 30;18(5):1144-1152.



## Main manuscript

- 1  
2  
3  
4  
5  
6  
7  
8  
9  
10  
11  
12  
13  
14  
15  
16  
17  
18  
19  
20  
21  
22  
23  
24  
25  
26  
27  
28  
29  
30  
31  
32  
33  
34  
35  
36  
37  
38  
39  
40  
41  
42  
43  
44  
45  
46  
47  
48  
49  
50  
51  
52  
53  
54  
55  
56  
57  
58  
59  
60
22. Nossiter A. Cholera Epidemic Envelops Coastal Slums in West Africa. *New York Times*. Aug 22, 2012.
23. Desai VK, Kapadia SJ, Kumar P, Nirupam S. Study of measles incidence and vaccination coverage in slums of Surat city. *Indian J Community Med* 2003 Jan 1; 28(10).
24. Xia H, Nagaraj K, Chen J, Marathe MV. Synthesis of a high resolution social contact network for Delhi with application to pandemic planning. *Artif Intell Med* 2015; 65(2): 113-130.
25. Barrett CL, Beckman RJ, Khan M, Anil Kumar VS, Marathe MV, Stretz PE, Dutta T, Lewis B. Generation and analysis of large synthetic social contact networks. In Winter Simulation Conference 2009 Dec 13 (pp. 1003-1014). Winter Simulation Conference.
26. Bissett K, Cadena J, Khan M, Kuhlman CJ, Lewis B, Telionis PA. An integrated agent-based approach for modeling disease spread in large populations to support health informatics. In 2016 IEEE-EMBS International Conference on Biomedical and Health Informatics (BHI) 2016 Feb 24 (pp. 629-632). IEEE.
27. Chen J, Chu S, Chungbaek Y, Khan M, Kuhlman C, Marathe A, Mortveit H, Vullikanti A, Xie D. Supplemental Information for Effect of Modelling Slum Populations on Influenza Spread in Delhi. *BMJ Open* 2016b Sep 1;6(9):e011699. Available at: <http://bmjopen.bmj.com/content/6/9/e011699/DC1/embed/inline-supplementary-material-1.pdf>
28. Koopman, J.S. (2004). Modeling infection transmission. Annual Review of Public Health 303-326.
29. Liao S, Ma Y, Chen J, Marathe A. Paid Sick-Leave: Is It a Good Way to Control Epidemics? International Conference on Complex Sciences: Theory and Applications, December 57, Santa Fe, New Mexico. Springer series Lecture Notes of the Institute for Computer Sciences, Social Informatics and Telecommunications Engineering. Edited by Glass, Kristin and Colbaugh, Richard and Ormerod, Paul and Tsao, Je\_rey. Complex Sciences: Springer, vol. 12 pp 213-227.
30. Marathe A, Lewis B, Chen J, Eubank S. Sensitivity of household transmission to household contact structure and size. *PLoS ONE* 2011 Aug 1;6(8):e22461.
31. Kaji M, Watanabe A, Aizawa H. Differences in clinical features between Influenza A H1N1, A H3N2, and B in adult patients. *Respirology* 2003;8:231–233.

## Main manuscript

- 1  
2  
3  
4  
5  
6  
7  
8  
9  
10  
11  
12  
13  
14  
15  
16  
17  
18  
19  
20  
21  
22  
23  
24  
25  
26  
27  
28  
29  
30  
31  
32  
33  
34  
35  
36  
37  
38  
39  
40  
41  
42  
43  
44  
45  
46  
47  
48  
49  
50  
51  
52  
53  
54  
55  
56  
57  
58  
59  
60
32. Meeyai A, Praditsitthikorn N, Kotirum S, Kulpeng W, Putthasri W, Cooper BS, Teerawattananon Y. Seasonal influenza vaccination for children in Thailand: a cost-effectiveness analysis. *PLoS Med* 2015 May 26;12(5):e1001829.
33. Longini IM, Nizam A, Xu S, Ungchusak K, Hanshaoworakul W, Cummings DA, Halloran ME. Containing pandemic influenza at the source. *Science* 2005 Aug 12;309(5737):1083-1087.
34. Choudhry A, Singh S, Khare S, Rai A, Rawat DS, Aggarwal RK, Chauhan LS. Emergence of pandemic 2009 influenza A H1N1, India. *Indian J Med Res* 2012 Apr 1;135(4):534-537.
35. Gurav YK, Pawar SD, Chadha MS, Potdar VA, Deshpande AS, Koratkar SS, Hosmani AH, Mishra AC. Pandemic influenza A(H1N1) 2009 outbreak in a residential school at Panchgani, Maharashtra, India. *Indian J Med Res* 2010;132:67-71.
36. Broor S, Gupta S, Mohapatra S, Kaushik S, Mir MA, Jain P, Dar L, Lal RB. Emergence of 2009A/H1N1 cases in a tertiary care hospital in New Delhi, India. *Influenza and other respiratory viruses* 2011 Nov 1;5(6):e552-557.
37. Ramamurthy N, Pillai LC, Gunasekaran P, Elango V. Influenza activity among the paediatric age group in Chennai. *Indian J Med Res* 2005 Jun 1;121(6):776-779.
38. Crocker-Buque T, Mindra G, Duncan R, Mounier-Jack S. Immunization, Urbanization and Slums—A Systematic Review of Factors and Interventions. *BMC Public Health* 2017; 17(556):1-16.
39. Vashishtha VM, Kalra A, Choudhury P. Influenza Vaccination in India: Position Paper of Indian Academy of Pediatrics. *Indian Pediatrics* 2013; 50: 867-874.
40. Koul PA, Bali NK, Ali S, Ahmad SJ, Bhat MA, Mir H, Akram S, Khan UH. Poor Uptake of Influenza Vaccination in Pregnancy in Northern India. *Journal of Gynecology and Obstetrics*. 2014; 127:234-237.
41. World Health Organization. Measures in School Settings. Pandemic (H1N1) 2009 Briefing note 10. 2009. ([http://www.who.int/csr/disease/swineflu/notes/h1n1\\_school\\_measures\\_20090911/en/](http://www.who.int/csr/disease/swineflu/notes/h1n1_school_measures_20090911/en/)).
42. Jackson C, Mangtani P, Hawker J, Olowokure B, Vynnycky E. The Effects of School Closures on Influenza Outbreaks and Pandemics: Systematic Review of Simulation Studies. *PLoS ONE* 2014; 9:e97297.

## Main manuscript

- 1  
2  
3  
4  
5  
6  
7  
8  
9  
10  
11  
12  
13  
14  
15  
16  
17  
18  
19  
20  
21  
22  
23  
24  
25  
26  
27  
28  
29  
30  
31  
32  
33  
34  
35  
36  
37  
38  
39  
40  
41  
42  
43  
44  
45  
46  
47  
48  
49  
50  
51  
52  
53  
54  
55  
56  
57  
58  
59  
60
43. Bonds MH, Keenan DC, Rohani P, Sachs JD. Poverty Trap Formed by the Ecology of Infectious Diseases. *Proceedings of the Royal Society B* 2010 Apr 22; 277(1685):1185-1192.
44. Un-Habitat. The challenge of slums: global report on human settlements 2003. *Management of Environmental Quality: An International Journal* 2004 Jun 1; 15(3): 337-338.
45. Letendre K, Fincher CL, Thornhill R. Does infectious disease cause global variation in the frequency of intrastate armed conflict and civil war? *Biological Reviews* 2010 Aug 1;85(3):669-683.
46. Björkstén B. Effects of intestinal microflora and the environment on the development of asthma and allergy. In *Springer seminars in immunopathology* 2004 February; 25(3-4): 257-270. Springer-Verlag.
47. Koul PA, Broor S, Saha S, Barnes J, Smith C, Shaw M, Chadha M, Lal RB. Differences in Influenza Seasonality by Latitude, Northern India. *Emerging Infectious Diseases* 2014 Oct;20(10): 1723-1726.
48. Hirve S, Newman LP, Paget J, Azziz-Baumgartner E, Fitzner J, Bhat N, Vandemaele K, Zhang W. Influenza Seasonality in the Tropics and Subtropics—When to Vaccinate? *PloS ONE* 2016 Apr 27;11(4):e0153003.

Main manuscript

**FIGURE 1:** Epidemic curves for base case and vaccination case. Each time point in the curve is an average over 25 replicates. The vaccines are given randomly to 30% of the entire population and the vaccine efficacy is 30%. For Network 2, epidemic curves are shown for total population and slum and non-slum subpopulations. 'Intervene Total' refers to the epidemic curve of the entire Delhi population when the vaccine intervention is applied. 'Intervene Slum' refers to the epidemic curve for just the slum population, and 'Intervene Non-slum' refers to the epidemic curve for just the non-slum population for the intervention case. Epidemic curves for a variety of compliances and efficacies are reported in Figures S1 and S2.

**FIGURE 2:** Mean cumulative infection rates for different subgroups in the two networks. Two vaccination rates ( $v = 30\%$ ,  $50\%$ ) and two vaccine efficacy rates ( $\alpha = 30\%$ ,  $70\%$ ) are considered. Individuals are chosen at random in the entire network for vaccination on day 0. Mean infection rates are calculated within each group. The last several lines in the plot for Network 1 are overlapping at the bottom because the mean infection rates are almost zero under those scenarios. 'Total' refers to the entire population of Delhi. 'Slum' and 'Non-slum' refer to slum and non-slum regions, respectively. 'Male' and 'Female' denote the total number of males and females in Delhi, respectively. Age groups are denoted by 'Preschool', 'School', 'Adult', and 'Senior'.

(a) Total Delhi Network 1      (b) Total Delhi Network 2

**Figure 3.** Mean cumulative infection rates under different interventions for Network 1 and Network 2. The larger font numbers are fractions of populations that are infected and the smaller font numbers are counts of infected individuals. Colors of the boxes correspond to the values of the large numbers (i.e., fractions of infected), and the same scheme is used for both plots for comparisons—and for all plots in this paper. Five different compliance rates are examined (10%, 30%, 50%, 70% and 90%), and 4 types of intervention strategies (vaccination (VAX), close-schools (CS), stay-home (SHO) and isolation (ISO)) are considered. For vaccines, three different trigger points are considered: when the cumulative infection rate reaches 0% (VAX0), 1% (VAX1) and 5% (VAX5) of the total population. The vaccine efficacy is set at 30%. For close-schools, two trigger points are used: when cumulative infection rate reaches 1% (CS1) and 5% (CS5). Compliant individuals are selected at random from the entire Delhi population, and the cumulative infection rates are calculated for each network.

(a) Slum      (b) Non-slum

**Figure 4.** Heat map of cumulative infection rates in slum and non-slum regions of Network 2 under different intervention strategies. The colors of boxes correspond to the larger numbers in the boxes—the cumulative infection rates—and the two plots use the same scheme for comparisons. Darker colors correspond to higher infection rates. The smaller font numbers are counts of infected individuals. The vaccination efficacy is fixed at 30%. Five different compliance rates (10%, 30%, 50%, 70% and 90%) and 4 types of

Main manuscript

1  
2  
3 intervention strategies (vaccination (VAX), close-schools (CS), stay-home (SHO) and  
4 isolation (ISO)) are considered. For vaccines, three different trigger points are  
5 considered: when cumulative infection rate reaches 0% (VAX0), 1% (VAX1) and 5%  
6 (VAX5). For close-schools, two trigger points are used: when the cumulative infection  
7 rate reaches 1% (CS1) and 5% (CS5). Compliant individuals are selected randomly  
8 from the entire Delhi population, and the mean infection rates are calculated separately  
9 for the slum and non-slum subpopulations. Although not reported here, qualitatively  
10 similar results are found for other transmission rates, as well as for higher vaccine  
11 efficacy (70%). Base is the baseline case with no interventions. The smaller-font  
12 numbers under the infection rate show the actual number of infected individuals.  
13  
14  
15

16 **FIGURE 5:** Mean cumulative infection rates for each category listed on the x-axis, for  
17 Network 2 and Network 1, under four different intervention scenarios. The color scheme  
18 of the boxes are based on the large values in the boxes—the cumulative infection rates.  
19 Darker colors correspond to higher infection rates. Smaller font values are the number  
20 of infected individuals. The vaccine efficacy is set at 30%. VsSs refers to the case when  
21 vaccines and social distancing are both applied to slum residents; VnSn refers to the  
22 case when vaccines and social distancing are applied to non-slum residents. Similarly,  
23 VsSn means vaccines are given to slums and stay home is applied to non-slums; and  
24 VnSs means vaccines are given to non-slums and stay home is applied to slums. Base  
25 refers to the case where no intervention is applied. The smaller-font numbers under the  
26 infection rates show the actual number of infected individuals in each category listed on  
27 the x-axis.  
28  
29  
30  
31  
32  
33  
34  
35  
36  
37  
38  
39  
40  
41  
42  
43  
44  
45  
46  
47  
48  
49  
50  
51  
52  
53  
54  
55  
56  
57  
58  
59  
60

1  
2  
3  
4  
5  
6  
7  
8  
9  
10  
11  
12  
13  
14  
15  
16  
17  
18  
19  
20  
21  
22  
23  
24  
25  
26  
27  
28  
29  
30  
31  
32  
33  
34  
35  
36  
37  
38  
39  
40  
41  
42  
43  
44  
45  
46  
47  
48  
49  
50  
51  
52  
53  
54  
55  
56  
57  
58  
59  
60



338x190mm (300 x 300 DPI)

review only

1  
2  
3  
4  
5  
6  
7  
8  
9  
10  
11  
12  
13  
14  
15  
16  
17  
18  
19  
20  
21  
22  
23  
24  
25  
26  
27  
28  
29  
30  
31  
32  
33  
34  
35  
36  
37  
38  
39  
40  
41  
42  
43  
44  
45  
46  
47  
48  
49  
50  
51  
52  
53  
54  
55  
56  
57  
58  
59  
60



338x190mm (300 x 300 DPI)

review only

1  
2  
3  
4  
5  
6  
7  
8  
9  
10  
11  
12  
13  
14  
15  
16  
17  
18  
19  
20  
21  
22  
23  
24  
25  
26  
27  
28  
29  
30  
31  
32  
33  
34  
35  
36  
37  
38  
39  
40  
41  
42  
43  
44  
45  
46  
47  
48  
49  
50  
51  
52  
53  
54  
55  
56  
57  
58  
59  
60

| Intervention   | Base    | C <sub>1</sub> | C <sub>2</sub> | S <sub>1</sub> | S <sub>2</sub> | I <sub>1</sub> | I <sub>2</sub> | V <sub>1</sub> | V <sub>2</sub> |
|----------------|---------|----------------|----------------|----------------|----------------|----------------|----------------|----------------|----------------|
| V <sub>1</sub> | 0.36    | 0.23           | 0              | 0              | 0              |                |                |                |                |
| V <sub>2</sub> | 5038837 | 3228985        | 20921          | 221            | 97             |                |                |                |                |
| I <sub>1</sub> | 0.37    | 0.25           | 0.11           | 0.04           | 0.02           |                |                |                |                |
| I <sub>2</sub> | 5061754 | 3405459        | 1549547        | 539181         | 322258         |                |                |                |                |
| S <sub>1</sub> | 0.37    | 0.27           | 0.19           | 0.13           | 0.1            |                |                |                |                |
| S <sub>2</sub> | 5146506 | 3802876        | 2618588        | 1781022        | 1318401        |                |                |                |                |
| C <sub>1</sub> | 0.3     | 0              | 0              | 0              | 0              |                |                |                |                |
| C <sub>2</sub> | 4158127 | 648            | 62             | 35             | 23             |                |                |                |                |
| S <sub>1</sub> | 0.36    | 0.12           | 0              | 0              | 0              |                |                |                |                |
| S <sub>2</sub> | 4939914 | 1659965        | 241            | 89             | 51             |                |                |                |                |
| I <sub>1</sub> | 0.36    | 0.24           | 0.14           | 0.08           | 0.06           |                |                |                |                |
| I <sub>2</sub> | 5017949 | 3367475        | 1880956        | 1121321        | 881914         |                |                |                |                |
| C <sub>1</sub> | 0.37    | 0.27           | 0.19           | 0.15           | 0.16           |                |                |                |                |
| C <sub>2</sub> | 5112280 | 3738161        | 2615064        | 2125815        | 2169135        |                |                |                |                |
| Base           | 0.42    | 0.42           | 0.42           | 0.42           | 0.42           |                |                |                |                |
|                | 5772516 | 5772516        | 5772516        | 5772516        | 5772516        |                |                |                |                |

| Intervention   | Base    | C <sub>1</sub> | C <sub>2</sub> | S <sub>1</sub> | S <sub>2</sub> | I <sub>1</sub> | I <sub>2</sub> | V <sub>1</sub> | V <sub>2</sub> |
|----------------|---------|----------------|----------------|----------------|----------------|----------------|----------------|----------------|----------------|
| V <sub>1</sub> | 0.44    | 0.33           | 0.19           | 0              | 0              |                |                |                |                |
| V <sub>2</sub> | 6070999 | 4584539        | 2669426        | 18530          | 206            |                |                |                |                |
| I <sub>1</sub> | 0.44    | 0.34           | 0.21           | 0.1            | 0.04           |                |                |                |                |
| I <sub>2</sub> | 6087287 | 4654816        | 2967789        | 1350667        | 554670         |                |                |                |                |
| S <sub>1</sub> | 0.44    | 0.35           | 0.26           | 0.17           | 0.13           |                |                |                |                |
| S <sub>2</sub> | 6146453 | 4898048        | 3594239        | 2329038        | 1818146        |                |                |                |                |
| C <sub>1</sub> | 0.39    | 0.03           | 0              | 0              | 0              |                |                |                |                |
| C <sub>2</sub> | 5465084 | 478780         | 85             | 37             | 23             |                |                |                |                |
| S <sub>1</sub> | 0.44    | 0.31           | 0.08           | 0              | 0              |                |                |                |                |
| S <sub>2</sub> | 6047827 | 4323509        | 1098024        | 543            | 83             |                |                |                |                |
| I <sub>1</sub> | 0.45    | 0.37           | 0.31           | 0.29           | 0.27           |                |                |                |                |
| I <sub>2</sub> | 6191602 | 5188739        | 4357831        | 4018271        | 3675802        |                |                |                |                |
| C <sub>1</sub> | 0.47    | 0.44           | 0.43           | 0.42           | 0.4            |                |                |                |                |
| C <sub>2</sub> | 6470698 | 6101056        | 5883830        | 5766943        | 5600599        |                |                |                |                |
| Base           | 0.48    | 0.48           | 0.48           | 0.48           | 0.48           |                |                |                |                |
|                | 6704038 | 6704038        | 6704038        | 6704038        | 6704038        |                |                |                |                |

338x190mm (300 x 300 DPI)

review only



1  
2  
3  
4  
5  
6  
7  
8  
9  
10  
11  
12  
13  
14  
15  
16  
17  
18  
19  
20  
21  
22  
23  
24  
25  
26  
27  
28  
29  
30  
31  
32  
33  
34  
35  
36  
37  
38  
39  
40  
41  
42  
43  
44  
45  
46  
47  
48  
49  
50  
51  
52  
53  
54  
55  
56  
57  
58  
59  
60

|  |                   |            |         |         |         |         |
|--|-------------------|------------|---------|---------|---------|---------|
|  |                   | 0.69       | 0.58    | 0.4     | 0       | 0       |
|  | V <sub>air0</sub> | 1263625    | 1041034 | 719517  | 7505    | 66      |
|  | V <sub>air1</sub> | 0.69       | 0.58    | 0.43    | 0.24    | 0.1     |
|  | V <sub>air5</sub> | 1296162    | 1052247 | 775240  | 426160  | 166606  |
|  | V <sub>air7</sub> | 0.7        | 0.6     | 0.49    | 0.36    | 0.29    |
|  | V <sub>air9</sub> | 1265497    | 1094158 | 890080  | 649544  | 525620  |
|  | ISO               | 0.65       | 0.08    | 0       | 0       | 0       |
|  | ISO               | 1168239    | 146106  | 20      | 7       | 3       |
|  | SHO               | 0.71       | 0.61    | 0.25    | 0       | 0       |
|  | SHO               | 1279142    | 1102671 | 460613  | 301     | 30      |
|  | CS <sub>1</sub>   | 0.72       | 0.7     | 0.67    | 0.66    | 0.65    |
|  | CS <sub>1</sub>   | 1311761    | 1260823 | 1215625 | 1194938 | 1171916 |
|  | CS <sub>3</sub>   | 0.73       | 0.72    | 0.72    | 0.71    | 0.71    |
|  | CS <sub>3</sub>   | 1326417    | 1309021 | 1298824 | 1292254 | 1283791 |
|  | Base              | 0.74       | 0.74    | 0.74    | 0.74    | 0.74    |
|  | Base              | 1337160    | 1337160 | 1337160 | 1337160 | 1337160 |
|  |                   | 10%        | 30%     | 50%     | 70%     | 90%     |
|  |                   | Compliance |         |         |         |         |

|  |                   |            |         |         |         |         |
|--|-------------------|------------|---------|---------|---------|---------|
|  |                   | 0.4        | 0.29    | 0.16    | 0       | 0       |
|  | V <sub>air0</sub> | 4817373    | 3542870 | 1921714 | 11025   | 139     |
|  | V <sub>air1</sub> | 0.4        | 0.3     | 0.18    | 0.08    | 0.03    |
|  | V <sub>air5</sub> | 4831106    | 3602969 | 2192949 | 924508  | 368084  |
|  | V <sub>air7</sub> | 0.41       | 0.32    | 0.22    | 0.14    | 0.11    |
|  | V <sub>air9</sub> | 4880956    | 3803892 | 2704160 | 1679494 | 1292525 |
|  | ISO               | 0.36       | 0.03    | 0       | 0       | 0       |
|  | ISO               | 4298845    | 332875  | 65      | 30      | 20      |
|  | SHO               | 0.4        | 0.27    | 0.05    | 0       | 0       |
|  | SHO               | 4768685    | 3220638 | 637412  | 242     | 53      |
|  | CS <sub>1</sub>   | 0.41       | 0.33    | 0.26    | 0.23    | 0.21    |
|  | CS <sub>1</sub>   | 4879841    | 3927917 | 3142206 | 2823334 | 2503886 |
|  | CS <sub>3</sub>   | 0.43       | 0.4     | 0.38    | 0.37    | 0.36    |
|  | CS <sub>3</sub>   | 5144281    | 4792032 | 4585006 | 4474690 | 4316809 |
|  | Base              | 0.45       | 0.45    | 0.45    | 0.45    | 0.45    |
|  | Base              | 5366878    | 5366878 | 5366878 | 5366878 | 5366878 |
|  |                   | 10%        | 30%     | 50%     | 70%     | 90%     |
|  |                   | Compliance |         |         |         |         |

338x190mm (300 x 300 DPI)

review only

1  
2  
3  
4  
5  
6  
7  
8  
9  
10  
11  
12  
13  
14  
15  
16  
17  
18  
19  
20  
21  
22  
23  
24  
25  
26  
27  
28  
29  
30  
31  
32  
33  
34  
35  
36  
37  
38  
39  
40  
41  
42  
43  
44  
45  
46  
47  
48  
49  
50  
51  
52  
53  
54  
55  
56  
57  
58  
59  
60

|           |                    |                   |                       |                    |
|-----------|--------------------|-------------------|-----------------------|--------------------|
| $V_{sSs}$ | 0.44<br>6043049    | 0.55<br>989079    | 0.42<br>5053971       | 0.37<br>5176345    |
| $V_{sSn}$ | 0.43<br>5938919    | 0.58<br>1042116   | 0.41<br>4896803       | 0.36<br>4995753    |
| $V_{nSs}$ | 0.44<br>6023678    | 0.67<br>1217415   | 0.40<br>4806263       | 0.36<br>4986302    |
| $V_{nSn}$ | 0.44<br>6104571    | 0.72<br>1309577   | 0.40<br>4794993       | 0.36<br>5016324    |
| Base      | 0.48<br>6704038    | 0.74<br>1337160   | 0.45<br>5366878       | 0.42<br>5772516    |
|           | Total<br>Network 2 | Slum<br>Network 2 | Non-slum<br>Network 2 | Total<br>Network 1 |

127x114mm (300 x 300 DPI)

only

Supplemental Information

**Disparities in Spread and Control of Influenza in Slums of Delhi:  
Findings From An Agent-Based Modeling Study**

A. Adiga, S. Chu, S. Eubank, C. J. Kuhlman, B. Lewis, A. Marathe, M. Marathe, E. K. Nordberg, S. Swarup, A. Vullikanti and M. L. Wilson

For peer review only

1  
2  
3  
4  
5  
6  
7  
8  
9  
10  
11  
12  
13  
14  
15  
16  
17  
18  
19  
20  
21  
22  
23  
24  
25  
26  
27  
28  
29  
30  
31  
32  
33  
34  
35  
36  
37  
38  
39  
40  
41  
42  
43  
44  
45  
46  
47  
48  
49  
50  
51  
52  
53  
54  
55  
56  
57  
58  
59  
60

## Supplemental Information

**Presentation of Results.**

For each set of input parameters, 25 replicates were run using agent-based simulation and the results presented are the average values over the 25 replicates. Also, 95% confidence intervals (CIs) are given when appropriate.

**Comparisons Between Network 1 and Network 2.**

Table S1 shows some differences between network1 and network 2 due to their different ways of modeling slum population. Note that these two networks are the same ones as those used in Chen et al.[1]. Further comparisons between the two networks are found in Chen et al.[2].

**Table S1.** Comparison of two networks as well as data sources for slum and non-slum Delhi, India.

|                                       | Network 1      |              | Network 2                                          |            |
|---------------------------------------|----------------|--------------|----------------------------------------------------|------------|
|                                       | Slum           | Non-slum     | Slum                                               | Non-slum   |
| Population Size                       | 0              | 13.8 million | 1.8 million                                        | 12 million |
| Average Household Size of Slum Region | 5.2            |              | 15.5                                               |            |
| Daily Activities                      | 33,890,156     |              | 39,077,861                                         |            |
| Number of Edges                       | 210,428,521    |              | 231,258,772                                        |            |
| Average Degree                        | 30.4           |              | 33.4                                               |            |
| Maximum Degree                        | 170            |              | 180                                                |            |
| Data Sources                          | MapMyIndia.com |              | MapMyIndia.com<br>Indiamart.com<br>MapMechanic.com |            |

Network 2 contains 298 slum zones, while network 1 models the whole population as non-slum. For network 1, the non-slum demographics and activities data is collected by survey through MapMyIndia.com. While for slum population, we collected additional data by Indiamart.com and MapMechanic.com for slum demographics and activities as well as slum polygons. More detailed demographic and activity differences can be found in the Chen et al.[1]

**Terminology and Abbreviations for Interventions.**

Table S2 contains abbreviations for different interventions and their meanings. Stay-at-home (SHO) and social isolation (ISO) interventions are applied to a person immediately after they become infected, while close-schools (CS) and vaccinations (VAX) may be applied after a specified fraction of the total population has been infected.

**Table S2:** Summary of abbreviations for interventions and their meanings.

## Supplemental Information

| Abbreviation | Definition                                                                                                                                                                                         |
|--------------|----------------------------------------------------------------------------------------------------------------------------------------------------------------------------------------------------|
| CS           | Close-schools: School-related interactions are eliminated.                                                                                                                                         |
| CSx          | Close-schools is implemented after the total fraction of the population that has been infected reaches x.                                                                                          |
| ISO          | Social isolation: a person who is socially isolated does not interact with any other person, even people in their home. Isolation is triggered only after a person becomes infectious.             |
| SHO          | Stay at home: All out-of-the-home activities for this person are eliminated, and this person only interacts with others at home. Stay at home is triggered only after a person becomes infectious. |
| VAX          | Vaccination: a person who is vaccinated has a reduced probability of contracting the virus.                                                                                                        |
| VAXx         | Vaccination of an individual occurs after the total fraction of the population that has been infected reaches x.                                                                                   |

Table S3 contains the variables used in simulations. The transmissibility corresponds to strong flu in Chen et al.[1] For vaccination, efficacy is either 30% or 70%. That is, for 30% efficacy, a person who gets vaccinated has reduced their susceptibility to infection by 30%.

**Table S3:** Summary of parameters and values used in simulations.

| Category                              | Values                                                                                                |
|---------------------------------------|-------------------------------------------------------------------------------------------------------|
| Networks of Delhi                     | Network 1 (does not model slums); Network 2 (models slums).                                           |
| Seeding                               | 20 people selected randomly over the entire population at time 0 as index cases.                      |
| Transmissibility                      | 0.000027.                                                                                             |
| Intervention approaches.              | Base case (no intervention); close-schools (CS); stay-home (SHO); isolation (ISO); vaccination (VAX). |
| Intervention/compliance rates.        | 10%, 30%, 50%, 70%, 90%.                                                                              |
| Efficacy of vaccination intervention. | 30%, 70%.                                                                                             |
| Intervention trigger time             | Cumulative infection rate reaches 0%, 1% and 5%.                                                      |
| Simulation replicates                 | 25                                                                                                    |

### The Agent Epidemic States and Disease Model.

An SEIR, Susceptible (S), Exposed (E), Infectious (I) and Removed or Recovered (R) model is considered within each individual. An infectious person spreads the disease to each susceptible neighbor independently with a probability referred to as the transmission probability, given by

$$p = \lambda (1 - (1 - \tau)^{\Delta t}),$$

## Supplemental Information

where  $\lambda$  is a scaling factor to lower the probability (e.g., in the case of vaccination),  $\tau$  is the transmissibility and  $\Delta t$  is the duration of interaction in minutes. Durations of contact are labels on the network edges. A susceptible person undergoes independent trials from all of its neighbors that are infectious. The transmission probability is a function of the number and duration of contacts.[3] This is selected to simulate an Influenza model resulting in a  $R_0=1.26$  (cumulative attack rate 42%, corresponding to a transmissibility of 0.000027 per minute of contact time) for Network 1, and  $R_0=1.39$  (cumulative attack rate 48%) for Network 2.[4] This transmissibility value is used uniformly throughout this study and corresponds to the probability at which an infectious node infects a susceptible node per minute of contact.

At each time (day), if an infectious person infects a susceptible person, the susceptible person transitions to the exposed (or incubating) state. The exposed person has contracted Influenza but cannot yet spread it to others. The incubation period is assigned per person, according to the following distribution: 1 day (30%); 2 days (50%); 3 days (20%). At the end of the exposed or incubation period, the person switches to an infected state. The duration of infectiousness is assigned per person, according to the distribution: 3 days (30%); 4 days (40%); 5 days (20%); 6 days (10%). After the infectious period, the person recovers and stays healthy for the simulation period. This sequence of state transitions is irreversible and is the only possible disease progression.

## Epidemic Curves for Other Interventions, for Varying Efficacy and Compliances.



**Figure S1:** Epidemic curves for the base case and the vaccination case. The vaccines are given randomly to 50% of the entire population, and the vaccine efficacy is assumed to be 30%. The transmissibility is 0.000027.

Supplemental Information

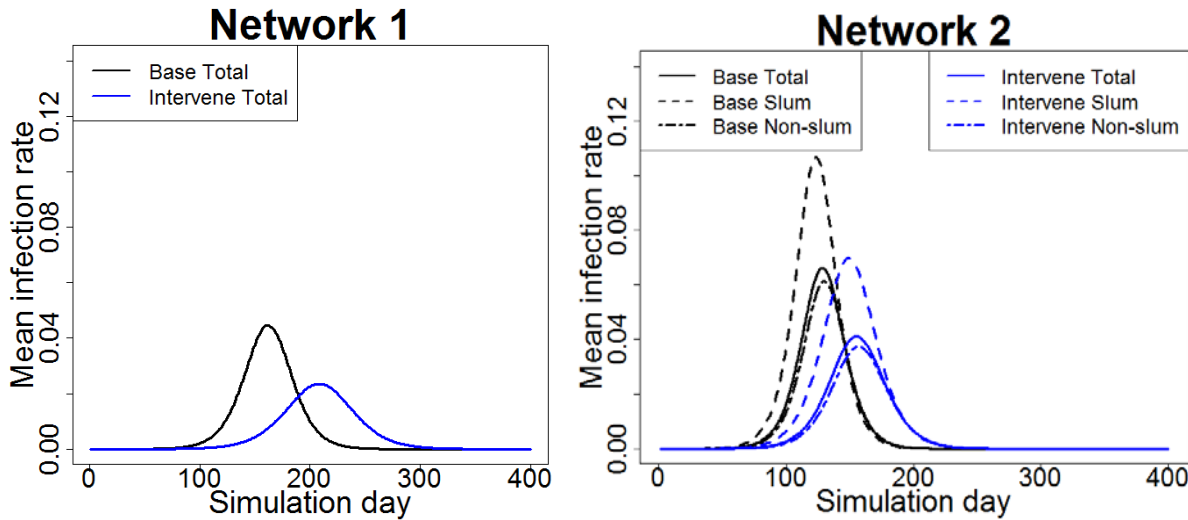

**Figure S2:** Epidemic curves for the base case and vaccination case. The vaccines are given randomly to 10% of the entire population and the vaccine efficacy is 70%. The transmissibility is 0.000027.

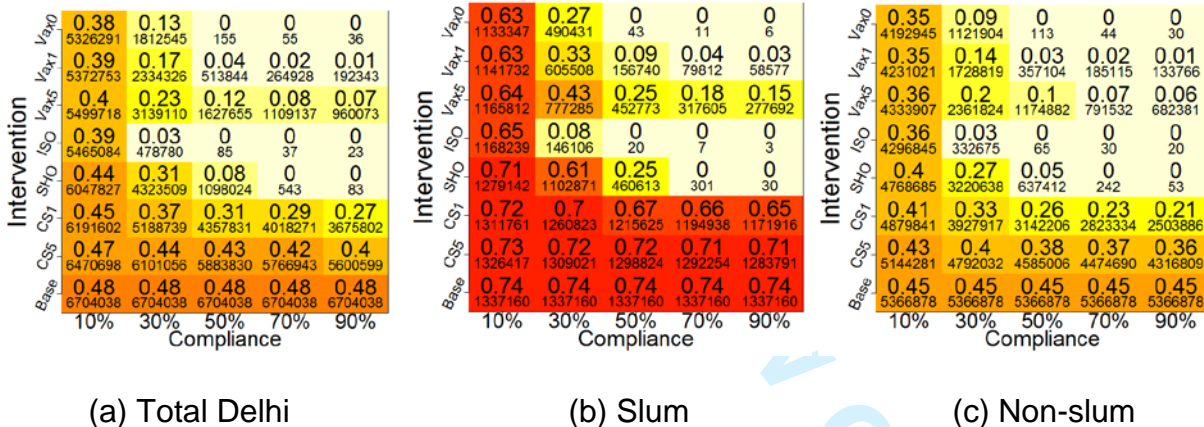

**Figure S3.** Heat map of mean cumulative infection rates in Delhi, and slum and non-slum regions under different intervention strategies for Network 2. The vaccination efficacy is fixed at 70%. Five different compliance rates, i.e., 10%, 30%, 50%, 70% and 90% and 4 types of intervention strategies, i.e. vaccination (VAX), close-schools (CS), stay-home (SHO) and isolation (ISO), are considered. For vaccines, three different trigger points are considered: when cumulative infection rate reaches 0% (VAX0), 1% (VAX1) and 5% (VAX5). For close-schools, two trigger points are used i.e. when cumulative infection rate reaches 1% (CS1) and 5% (CS5). Compliant individuals are selected randomly from the entire Delhi population and the mean cumulative infection rates are calculated separately for the total population, and slum and non-slum subpopulations. Base is the baseline case with no interventions. The smaller-font numbers under the infection rate show the actual number of infected individuals. Darker colors correspond to higher infection rates.

## Supplemental Information

### Tabulations of Basic Results: Comparisons between Networks 1 and 2 for Compliance of 30% and Efficacy of 30%.

Table S4 shows results when 30% of the population that is selected uniformly at random is vaccinated with a vaccine that is 30% effective. The contrast between the two populations is even greater when considering interventions. The peak infection rate of the entire population increases by 123.2% (95% CI: 122.7%-123.7%) in Network 2 compared to Network 1 for the intervention, versus 47.6% difference between the networks in Table S8. The time to peak decreases by 35.7% (95% CI: 32.9%-38.8%) in Network 2 compared to that in Network 1, for the intervention case, compared to only 20.84% percentage change between the two Networks for the base case in Table S8. The cumulative infection rate (or attack rate) is also underestimated, which is 42.2% (95% CI: 41.5%-42.8%) greater on average in Network 2 compared to Network 1 for the intervention case. Hence, the differences between key epidemic results for Networks 1 and 2 that are generated for the intervention case are even more pronounced than they are for the base case. These values are all statistically significant.

**Table S4:** Comparisons of key epidemic parameters for Networks 1 and 2 for a vaccination intervention before the epidemic starts (VAX0), where the vaccine efficacy is 30% and the compliance rate is 30%.

| Vaccination               | Network 1 | Network 2 | Compare-absolute               | Compare-relative                     |
|---------------------------|-----------|-----------|--------------------------------|--------------------------------------|
| Time to Peak              | 286       | 184       | 102<br>(95% CI: 94-111)        | 35.7%<br>(95% CI: 32.9%-38.8%)       |
| Peak Infection Rate       | 1.34%     | 2.99%     | 1.65%<br>(95% CI: 1.64%-1.66%) | 123.19%<br>(95% CI: 122.69%-123.65%) |
| Cumulative Infection Rate | 23.3%     | 33.1%     | 9.82%<br>(95% CI: 9.67%-9.96%) | 42.17%<br>(95% CI: 41.51%-42.77%)    |

Table S5 shows the effect of delay in applying interventions. The numbers show the percentage difference in cumulative infection rate in slums and non-slums of Network 2 for the specified interventions and compliance rates at different trigger levels. For example, the value 30.55% at 0.1% compliance means that for intervention close-schools, where this intervention is implemented after 5% of the total population is infected, the fraction of people in slums that get infected is 30.55% greater than the fraction of non-slum residents who get infected.

**Table S5.** Differences of epidemic size between slum and non-slum regions for Network 2 for base case (no intervention); close-schools (CS) after 1% total outbreak fraction (CS1) and after 5% total outbreak fraction (CS5); stay at home (SHO); social isolation (ISO); vaccination (VAX) after 1% total outbreak fraction (VAX1) and after 5% total outbreak fraction (VAX5), under various compliance rates. The vaccination efficacy is 30%.

| Compliance | Base   | CS5    | CS1    | SHO    | ISO    | VAX5   | VAX1   |
|------------|--------|--------|--------|--------|--------|--------|--------|
| 0.1        | 29.30% | 30.55% | 31.94% | 31.06% | 28.85% | 29.37% | 29.27% |
| 0.3        | 29.30% | 32.52% | 37.03% | 34.18% | 5.31%  | 28.85% | 28.21% |



## Supplemental Information

|     |        |        |        |        |       |        |        |
|-----|--------|--------|--------|--------|-------|--------|--------|
| 0.5 | 29.30% | 33.67% | 41.07% | 20.16% | 0.00% | 26.72% | 24.62% |
| 0.7 | 29.30% | 34.23% | 42.57% | 0.01%  | 0.00% | 21.94% | 15.87% |
| 0.9 | 29.30% | 35.07% | 43.95% | 0.00%  | 0.00% | 18.31% | 7.25%  |

Table S6 examines the difference in effects of interventions on the cumulative infection rate in Network 2. These data use both the stay home (SHO) and the isolation (ISO) interventions as base cases. Each entry represents the difference between the cumulative infection rates for the specified pharmaceutical interventions and SHO or ISO. For example, 18.03% means that the cumulative infection rate for vaccinating after 5% of the population is infected, is 18.03% greater than that for the intervention of SHO; 31.92% means that the cumulative infection rate for vaccinating after 5% of the population is infected is 31.92% greater than that for the intervention of ISO. Thus, the larger the magnitude of a positive number, the greater the effectiveness of SHO or ISO compared to the specified pharmaceutical intervention.

**Table S6.** Differences in epidemic size between stay at home (SHO) interventions, social isolation (ISO) interventions and pharmaceutical interventions (VAX0, VAX1, VAX5), under various compliance rates. The compliance rate and efficacy for vaccination is 30% and 30%, respectively.

| Compliance | Vax5-SHO | Vax1-SHO | Vax0-SHO | VAX5-ISO | VAX1-ISO | VAX0-ISO |
|------------|----------|----------|----------|----------|----------|----------|
| 0.1        | 0.71%    | 0.29%    | 0.17%    | 4.92%    | 4.49%    | 4.38%    |
| 0.3        | 4.15%    | 2.39%    | 1.89%    | 31.92%   | 30.17%   | 29.66%   |
| 0.5        | 18.03%   | 13.51%   | 11.35%   | 25.96%   | 21.44%   | 19.28%   |
| 0.7        | 16.82%   | 9.75%    | 0.13%    | 16.82%   | 9.76%    | 0.13%    |
| 0.9        | 13.13%   | 4.01%    | 0.00%    | 13.13%   | 4.01%    | 0.00%    |

### Effect of intervention on Network 2, With and Without Interventions.

The comparison between vaccination intervention and the base case in Network 2 is detailed in Table S7 below.

In Network 2, for the total population, vaccination delays the time to peak infection by 43.27% (95% CI: 40.14%-46.41%) relatively, from 128 to 184 days on average, while the peak infection rate is reduced by about 3.88% from 2.99% to 6.87% on average (56.47% relatively with 95% CI: 56.35%-56.56%). The total infection rate is reduced by 15.31% from 33.12% to 48.43% (31.62% relatively with 95% CI: 31.57%-31.67%).

In slum regions in Network 2, vaccination delays the time to peak infection by 43.09% (95% CI: 39.78%-46.4%) relatively, from 123 to 176 days on average, while the peak infection rate is reduced by about 5.70% from 5.42% to 11.12% on average (51.26% relatively with 95% CI: 50.88%-51.64%). The total infection rate in slums is reduced by 16.35% from 57.53% to 73.88% (22.13% relatively with 95% CI: 22.07% to 22.19%).

## Supplemental Information

In non-slum regions in Network 2, the time to peak is delayed by 43.44% (95% CI: 40.32%-46.56%) relatively, from 130 to 186 days on average, while the peak infection rate is reduced by about 3.68% from 2.69% to 6.36% on average (57.79% relatively with 95% CI: 57.64%-57.94%). The total infection rate in non-slums is reduced by 15.16% from 44.60% to 29.45% (33.98% relatively with 95% CI: 33.93% -34.03%).

**Table S7:** Comparisons between the base and vaccination cases for Network 2. The three parameters (time to peak, peak infection rate and cumulative infection rate) are broken out, and for each, values for the total population, and slum and non-slum subpopulations are given. The vaccination rate is 30% and efficacy is 30% for those receiving the vaccine.

| Network 2,<br>Time to Peak | Base | Vaccination | Compare-absolute   | Compare-Relative                       |
|----------------------------|------|-------------|--------------------|----------------------------------------|
| Total                      | 128  | 184         | 55 (95% CI: 51-59) | 43.27%<br>(95% CI: 40.14%-46.41%)      |
| Slum                       | 123  | 176         | 53 (95% CI: 49-57) | 43.09%<br>(95% CI: 39.78%-46.4%)       |
| Non-Slum                   | 130  | 186         | 56 (95% CI: 52-60) | 43.44%<br>(95% CI: 40.32% -<br>46.56%) |

| Network 2,<br>Peak Infection<br>Rate | Base   | Vaccination | Compare-absolute                    | Compare-Relative                     |
|--------------------------------------|--------|-------------|-------------------------------------|--------------------------------------|
| Total                                | 6.87%  | 2.99%       | -3.88%<br>(95% CI: -3.870% -3.884%) | -56.46%<br>(95% CI: -56.35% -56.56%) |
| Slum                                 | 11.12% | 5.42%       | -5.70%<br>(95% CI: -5.66% -5.74%)   | -51.26%<br>(95% CI: -50.88% -51.64%) |
| Non-Slum                             | 6.36%  | 2.69%       | -3.68%<br>(95% CI: -3.67% -3.69%)   | -57.79%<br>(95% CI: -57.64% -57.94%) |

| Network 2,<br>Cumulative<br>Infection Rate | Base   | Vaccination | Compare-absolute                     | Compare-Relative                     |
|--------------------------------------------|--------|-------------|--------------------------------------|--------------------------------------|
| Total                                      | 48.43% | 33.12%      | -15.31%<br>(95% CI: -15.29% -15.34%) | -31.62%<br>(95% CI: -31.57% -31.67%) |
| Slum                                       | 73.88% | 57.53%      | -16.35%<br>(95% CI: -16.30% -16.39%) | -22.13%<br>(95% CI: -22.07% -22.19%) |
| Non-Slum                                   | 44.60% | 29.45%      | -15.16%<br>95% CI: (-15.14% -15.18%) | -33.98%<br>(95% CI: -33.93% -34.03%) |

## Supplemental Information

Table S8 summarizes differences in key epidemic parameters for Networks 1 and 2 for the base case with no interventions. The peak infection rate is the maximum fraction of individuals who are infected on any day, the time to peak is the day on which the peak infection rate occurs, and cumulative infection rate is the cumulative fraction of individuals who get infected in the epidemic. Under the base case, the peak infection rate in Network 2 is 47.6% (95% CI: 47.4%-47.8%) greater compared to that in Network 1 ( $47.6\% = (6.87\% - 4.65\%) / 4.65\%$ ). The time to peak infection for Network 2 is decreased by 20.8% (95% CI: 19.2%-22.7%) compared to that in Network 1. The cumulative infection rate (or attack rate) is also underestimated under Network 1 by 16.1% (95% CI: 16.1%-16.2%) compared to Network 2. These results, presented in the main paper, are tabulated here in Table S8 for convenience and comparison.

**Table S8:** Comparisons of key epidemic parameters for Networks 1 and 2 for the base case.

| Base                      | Network 1 | Network 2 | Compare-absolute                  | Compare-relative                  |
|---------------------------|-----------|-----------|-----------------------------------|-----------------------------------|
| Time to Peak              | 162       | 128       | 34<br>(95% CI: 31-37)             | 20.84%<br>(95% CI: 19.19%-22.71%) |
| Peak Infection Rate       | 4.65%     | 6.87%     | 2.215%<br>(95% CI: 2.206%-2.224%) | 47.6%<br>(95% CI: 47.4%-47.8%)    |
| Cumulative Infection Rate | 41.70%    | 48.43%    | 6.73%<br>(95% CI: 6.71%-6.75%)    | 16.1%<br>(95% CI: 16.1%-16.2%)    |

### Effect of intervention on Network 1, With and Without Interventions.

In Network 1, vaccination delays the time to peak infection by 76.41%, from 162 to 286 days on average, with 95% CI: 71.53%-81.28%. The peak infection rate is reduced by 3.3121 percentage points, from 1.34% to 4.65%, which is a relative percentage difference (RPD) of -71.20%, with 95% CI: -71.02% to -71.38%. These and cumulative infection rate data are given in Table S9.

**Table S9:** Comparisons of a vaccination intervention (30% vaccination rate, 30% efficacy of a vaccination) with the base case in Network 1 Delhi.

| Network 1, Total          | Base  | Vaccination | Compare-absolute                  | Compare-relative                  |
|---------------------------|-------|-------------|-----------------------------------|-----------------------------------|
| Time to Peak              | 162   | 286         | 124<br>(95% CI: 116-132)          | 76.41%<br>(95% CI: 71.53%-81.28%) |
| Peak Infection Rate       | 4.65% | 1.34%       | 3.31%<br>(95% CI: 3.30%-3.32%)    | 71.20%<br>(95% CI: 71.02%-71.38)  |
| Cumulative Infection Rate | 41.7% | 23.3%       | 18.40%<br>(95% CI: 18.25%-18.55%) | 44.13%<br>(95% CI: 43.77%-44.48%) |

Tables S7 and S9 show that, generally, Network 1 is more responsive to intervention than Network 2. In Network 1, the percentage changes in time-to-peak, peak infection rate, and cumulative infection rate, due to intervention, are 76.4%, -71.2%, and -44.1%,

## Supplemental Information

respectively. For Network 2, these values are 43.3%, -56.5%, and -31.6%, respectively. The reason for lower impact in Network 2 is the greater connectivity of households in slums, which helps drive the contagion.

### Effect of interventions on slum and non-slum subpopulations of Network 2, compared to the base case.

The data used in comparing key outbreak parameters in slum and non-slum regions are taken from Table S7, and the corresponding epidemic curves are in Figure 1. The percentage change in peak infection rate due to intervention in slum (-51.3%) and non-slum (-57.8%) regions in Network 2, are comparable, although the magnitudes of the peak infections in slums are about twice those in the non-slum regions. For the cumulative infection rates, the relative drop from the intervention is greater for the non-slum (-34.0% vs. -22.1%) population than it is for the slum population, but the absolute drop is about the same (-16.3% vs. -15.1%).

**Table S10:** Comparison of results between slum and non-slum in Network 2. The input data is the same as in Table S7.

| Network 2, Base           | Slum   | Nonslum | Compare-absolute                    | Compare-relative                  |
|---------------------------|--------|---------|-------------------------------------|-----------------------------------|
| Time to Peak              | 123    | 130     | 7(95% CI: 4-9)                      | 5.26%<br>(95% CI: 3.37%-7.16%)    |
| Peak Infection Rate       | 1.12%  | 6.36%   | 4.76%<br>(95% CI: 4.72%-4.80%)      | 42.79%<br>(95% CI: 42.46%-43.14%) |
| Cumulative infection rate | 73.88% | 44.60%  | 29.25%<br>(95% CI: 29.25% - 29.31%) | 39.63%<br>(95% CI: 39.59%-39.67%) |

| Network 2, Vaccination    | Slum   | Nonslum | Compare-absolute                  | Compare-relative                  |
|---------------------------|--------|---------|-----------------------------------|-----------------------------------|
| Time to Peak              | 176    | 186     | 10(95% CI: 5-15)                  | 5.23%<br>(95% CI: 2.58%-8.46%)    |
| Peak Infection Rate       | 5.42%  | 2.69%   | 2.74%<br>(95% CI: 2.71% - 2.76%)  | 50.46%<br>(95% CI: 50.06%-50.86%) |
| Cumulative infection rate | 57.53% | 29.45%  | 28.08%<br>(95% CI: 28.04%-28.12%) | 48.82%<br>(95% CI: 48.74%-48.89%) |

Figure S4 contains the percentage changes between the base case and intervention case for Networks 1 and 2 for the three parameters in the legend, and further breaks down Network 2 into slum and non-slum subpopulations. This plot provides a summary of differences between the base and intervention cases. For all four conditions considered, the intervention reduces the severity of an epidemic. It delays the time when the infection peaks, and reduces the peak infection and the cumulative infection rates. Note that the intervention has a larger effect on the epidemics when applied to Network 1, as consistent with Figure 1.

## Supplemental Information

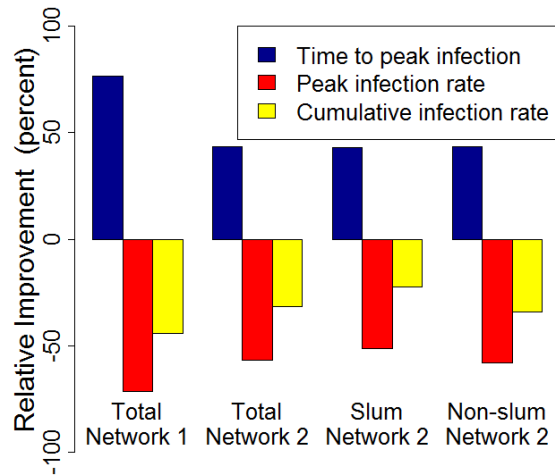

**Figure S4:** Effects of vaccination on time to peak infection, peak infection rate, and cumulative infection rate. The intervention is 30% vaccination rate and 30% vaccine efficacy. Each bar refers to the average value of the relative difference over 25 runs. Vaccination is more effective for Network 1 than Network 2, while, for Network 2, it is slightly more effective for the non-slum population than slum. Details of the data associated with this plot are provided in Tables S7 and S9.

Figure S5 provides the same data as in Figure S7, but now the data are provided as absolute differences, rather than as percentage changes. (There are three separate plots owing to the different ranges in absolute differences. Qualitatively, the time to peak infection (blue bars) does not change between the two networks and the two subpopulations of Network 2 (Figure S4 versus Figure S5(a)). However, the red bars in Figure S4 are qualitatively different from those in Figure S5(b), when considering absolute changes. That is, the magnitude of the percentage change in peak infection rate between the base and intervention cases is greatest in Network 1 (Figure S4, red bars), while in Figure S5(b), it is least on an absolute change basis. Similarly, the slum population in Network 2 shows the least percentage change in Figure S4, but the greatest absolute change in Figure S5(b). Rankings of the subpopulations in Network 2 is also reversed for cumulative infection rate: the percentage change is greatest in the non-slum region, while it is greatest for the slum regions in absolute terms.

Supplemental Information



**Figure S5:** Comparison of absolute difference in improvement; the relative differences are shown in Figure S7. Absolute differences vary across the three parameters, so each is given on a separate scale. Data are summarized in Tables S7 and S9.

**Evaluation of Network 2 Home and School Contacts.**



## Supplemental Information

**Figure S6:** Comparison of average contacts per person in slum and non-slum regions for home and school activity types in Network 2.

### Evaluation of Network 2 Edges Transmitting Infection.

Figure S7 provides counts of edges used to transmit infection for a base case simulation in Network 2 of Figure 1 of the main text. Edges are broken down by activity types of people who are interacting during transmission. Data are also broken down by the classifications of individuals interacting (e.g., slum and nonslum, see legend).

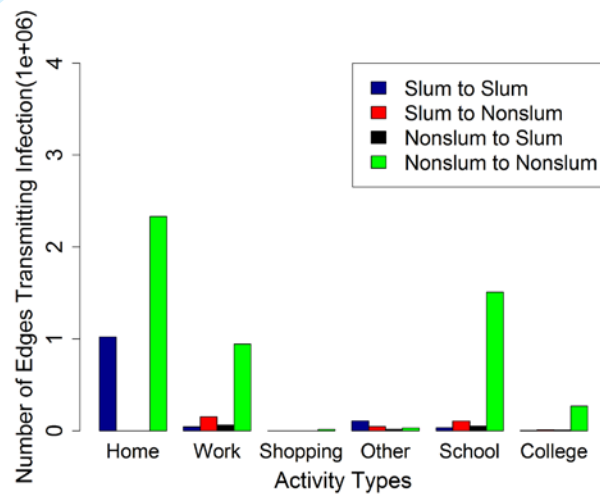

**Figure S7.** Data for Network 2. Number of edges transmitting infection (in millions) for each of the four types of interactions between slum and nonslum individuals (see legend) and for each activity type. The number of slum-to-nonslum edges is greater than nonslum-to-slum ones because once infection gets into a slum household, it may spread within the household more (because there are more people and connections). Thus, a slum household carries more infection to its interactions with nonslum people. The “Other” activity category, like home activity, shows more edges carrying infection for slum-to-slum interactions than slum-to-nonslum, which is consistent with Figures S4 and S6 of Chen et al.[2], where further network characteristics are given.

## Supplemental Information

## References

1. Chen J, Chu S, Chungbaek Y, Khan M, Kuhlman C, Marathe A, Mortveit H, Vullikanti A and Xie D. Effect of Modeling Slum Populations on Influenza Spread in Delhi. *BMJ Open*, Vol. 6, Issue 9, 2016a.
2. Chen J, Chu S, Chungbaek Y, Khan M, Kuhlman C, Marathe A, Mortveit H, Vullikanti A, Xie D. Supplemental Information for Effect of Modelling Slum Populations on Influenza Spread in Delhi. *BMJ Open*, 2016b, Sep 1;6(9):e011699.  
Available at: <http://bmjopen.bmj.com/content/6/9/e011699/DC1/embed/inline-supplementary-material-1.pdf>
3. Yang Y, Sugimoto JD, Halloran ME, Basta NE, Chao DL, Matrajt L, Potter G, Kenah E, Longini IM. The transmissibility and control of pandemic influenza A (H1N1) virus. *Science* 2009 Oct 30;326(5953):729-733.
4. Jesan T, Menon G, Sinha S. Epidemiological dynamics of the 2009 influenza A(H1N1) v outbreak in India. *Current Science* (00113891) 2011; 100(7): 1051.
